# Supplementary material for: Enantioselective synthesis of tetrahydroisoquinoline derivatives via chiral-at-metal rhodium complex catalyzed [3+2] cycloaddition
Source: Royal Society of Chemistry journal article supplement (doi:10.1039/c8cc08275h), 2018-12-01
Supplement: c8cc08275h1.pdf [file c8cc08275h1.pdf]

Supporting Information for

**Enantioselective Synthesis of Tetrahydroisoquinoline Derivatives via  
Chiral-at-Metal Rhodium Complex Catalyzed [3+2] Cycloaddition**

Saira Qurban,<sup>‡</sup> Yu Du,<sup>‡</sup> Jun Gong, Shao-Xia Lin, and Qiang Kang\*

Key Laboratory of Coal to Ethylene Glycol and Its Related Technology, Center for Excellence in Molecular Synthesis, Fujian Institute of Research on the Structure of Matter, University of Chinese Academy of Sciences, Chinese Academy of Sciences, 155 Yangqiao Road West, Fuzhou, 350002, China

**Table of contents**

|                                                                          |     |
|--------------------------------------------------------------------------|-----|
| General Information.....                                                 | S2  |
| Synthesis of Substrates .....                                            | S3  |
| General Procedure for the Catalytic Reactions.....                       | S5  |
| Synthetic Transformations.....                                           | S6  |
| Characterization of Products.....                                        | S8  |
| NMR Spectra .....                                                        | S33 |
| HPLC Spectra .....                                                       | S57 |
| Stereochemistry Determination via Single Crystal X-Ray Diffraction ..... | S81 |
| References.....                                                          | S83 |

## General Information

All non-aqueous reactions were performed in oven-dried glassware and standard Schlenk tubes under an atmosphere of nitrogen. 1,2-Dichloroethane (DCE) and dichloromethane (DCM) were distilled from CaH<sub>2</sub> under inert atmosphere. Tetrahydrofuran (THF) and toluene (PhMe) were distilled from sodium and benzophenone under inert atmosphere. Rhodium catalysts *rac*-RhO,  $\Delta$ -Rh1<sup>1</sup>,  $\Delta$ -Rh2<sup>2</sup>, and  $\Delta$ -Rh3<sup>3</sup> were prepared according to the reported procedures. All other solvents and reagents were used as received unless otherwise noted. Thin layer chromatography was performed using silica gel 60 F-254 precoated plates (0.2~0.3 mm) and visualized by short-wave UV (254 nm) irradiation, potassium permanganate, or iodine stain. Column chromatography was performed with silica gel (200-300 mesh, Yantai Jiangyou Silica Gel Development Co., Ltd). The NMR spectra were obtained in CDCl<sub>3</sub> using a Bruker Avance III spectrometer at 400 and 100 MHz for <sup>1</sup>H and <sup>13</sup>C NMR, respectively. Chemical shifts ( $\delta$ ) for <sup>1</sup>H NMR spectra are recorded in parts per million from tetramethylsilane with the resonance of methyl group as the internal standard ( $\delta$  0.00 ppm). Data are reported as follows: chemical shift, multiplicity (s = singlet, d = doublet, t = triplet, q = quartet, qn = quintet, m = multiplet and br = broad, dd = double doublet, hept = heptet), coupling constant in Hz, and integration. Chemical shifts for <sup>13</sup>C NMR spectra are recorded in parts per million from tetramethylsilane using the central peak of deuteriochloroform ( $\delta$  77.0 ppm) as the internal standard. The infrared spectra were recorded on a VERTEX 70 IR spectrometer as KBr pellets, with absorption reported in cm<sup>-1</sup>. HRMS data were obtained on a Thermo Fisher Scientific LTQ FT Ultrasystem. Optical rotation was recorded on INESA SGW-1 polarimeter at concentrations of 0.5g/100mL or 1.0g/100mL. Enantiomeric excess was determined by HPLC analysis on Chiralpak IA column and IC column (Daicel Chemical Industries, LTD) on Shimadzu LC-20AD. The crystallographic measurement was made on an Agilent SuperNova (Dual, Cu at zero, Atlas) diffractometer. The structure was solved by direct method and refined to convergence by least squares method on F2 using the SHELXTL-2014 software suit.

## Synthesis of Substrates

### Preparation of $\alpha,\beta$ -Unsaturated 2-acylimidazoles (1)

$\alpha,\beta$ -Unsaturated 2-acylimidazoles **1a-1s** were prepared according to reported procedures.<sup>4-6</sup> Substrate **1p** was prepared according to reported procedure.<sup>7</sup>

### Preparation of C,N-Cyclic Azomethine Imines (2)

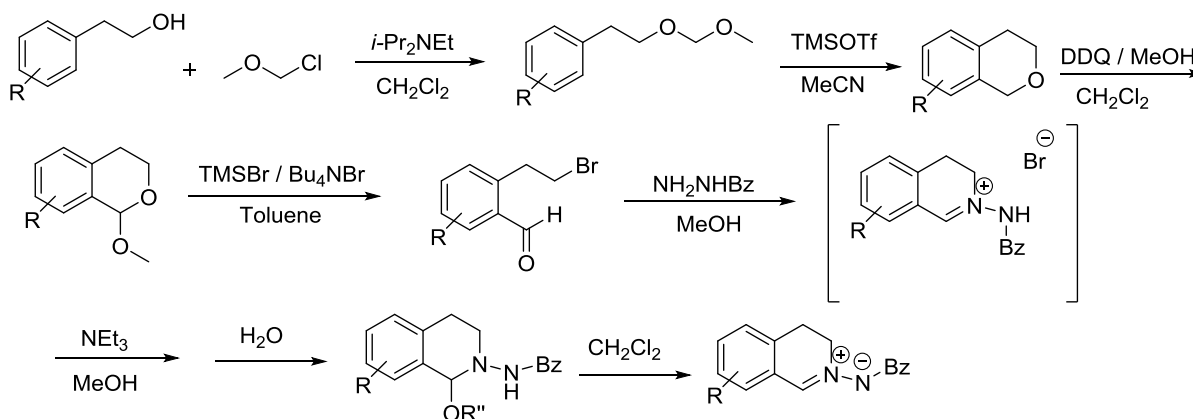

C,N-cyclic azomethine imines were prepared according to a general procedure.<sup>8,9</sup> To a stirred solution of phenethylol (20 mmol) in CH<sub>2</sub>Cl<sub>2</sub> (20 mL), *i*-Pr<sub>2</sub>NEt (6.97 mL, 40 mmol) and MOMCl (2.28 mL, 30 mmol) were added to this solution at 0 °C. The reaction solution was then allowed to warm to room temperature and stirred for 12 h. The mixture was poured into 1 N HCl and extracted with ethyl acetate. The combined organic layers were dried over Na<sub>2</sub>SO<sub>4</sub> and concentrated in vacuo to give phenylethyl methoxymethyl ether.

This crude material was diluted in CH<sub>3</sub>CN (20 mL), and TMSOTf (3.62 mL, 20 mmol) then added to this mixture at 0 °C. The reaction solution was then allowed to warm to room temperature and stirred for 24 h. The mixture was then treated with aq. NaHCO<sub>3</sub> and evaporated in vacuo to remove CH<sub>3</sub>CN. The residue was extracted with ethyl acetate, dried over Na<sub>2</sub>SO<sub>4</sub> and concentrated in vacuo. The residue was purified by column chromatography on silica gel.

To a solution of thus-obtained isochroman (9.18 mmol) in CH<sub>2</sub>Cl<sub>2</sub> were added methanol (447  $\mu$ L, 11.0 mmol) and DDQ (2.08 g, 9.18 mmol) at room temperature. After stirring for 48 h at room temperature, the suspension was filtered off to remove the insoluble waste. The filtrate was washed with saturated aqueous NaHCO<sub>3</sub>, extracted with CH<sub>2</sub>Cl<sub>2</sub>, dried over Na<sub>2</sub>SO<sub>4</sub> and concentrated in vacuo. The residue was purified by column chromatography on silica gel.

To a solution of the resulting 1-methoxyisochroman (6.48 mmol) in toluene (6.5 mL) were added Bu<sub>4</sub>NBr (2.09 g, 6.48 mmol) and TMSBr (1.71 mL, 13.0 mmol). The reaction solution was then allowed to warm to 80 °C and stirred for 4 h, then treated with saturated aqueous NaHCO<sub>3</sub>, extracted with ethyl acetate. The combined organic layers were dried over Na<sub>2</sub>SO<sub>4</sub> and concentrated in vacuo. The residue was purified by column chromatography on silica gel to give 2-(2-bromoethyl)-benzaldehyde.

To a 0.5 M solution of the corresponding 2-(2-bromoethyl)-benzaldehyde (1.05 equiv) in MeOH was added benzoylhydrazine or sulfonylhydrazine (1 equiv) at room temperature. After the immediate formation of the insoluble material, this white suspension was heated to reflux and stirred for additional 1 h to give a clear solution. After cooling to room temperature, the reaction solution was treated with Et<sub>3</sub>N (1.5 equiv), poured into water and stirred for 30 min to give a white precipitate (tentatively assigned as a methanol and/or water adduct of the corresponding betaine). This solid material was washed with cold ether and then dissolved in CH<sub>2</sub>Cl<sub>2</sub> to give a yellow solution. This colored solution was dried over Na<sub>2</sub>SO<sub>4</sub> and evaporated in vacuo to give N-benzoylimino-3,4-dihydroisoquinolium betaine as a yellow solid **2a**. By the above procedure all the substituted C,N-cyclic azomethine imines were prepared without any further purification.

## General Procedure for the Catalytic Reactions

### Synthesis of racemic products as HPLC references

**General Procedure:** A dried 25 mL Schlenk tube was charged with  $\alpha,\beta$ -unsaturated 2-acylimidazoles **1** (0.1 mmol), C,N-cyclic azomethine imines **2** (0.12 mmol) and racemic catalyst *rac*-**RhO** (1.6 mg, 2.0 mol%). The tube was purged with argon and anhydrous DCE (0.2 mL) was added. The reaction mixture was stirred at room temperature for indicated time (monitored by TLC) under argon. The mixture was purified by flash column chromatography on silica gel (petroleum ether/EtOAc = 5:1 to 1:1) to afford racemic products as HPLC reference for determination of enantiomeric excess.

### Substrate Scope

#### General Procedure for chiral product

A dried 25 mL Schlenk tube was charged with  $\alpha,\beta$ -unsaturated 2-acylimidazoles **1** (0.1 mmol), C,N-cyclic azomethine imines **2** (0.12 mmol) and chiral catalyst  $\Delta$ -**Rh2** (2.1 mg, 2.0 mol%). The tube was purged with argon and anhydrous DCE (0.2 mL) was added. The reaction mixture was stirred at room temperature for indicated time (monitored by TLC) under argon. The mixture was purified by flash column chromatography on silica gel (petroleum ether/EtOAc = 5:1 to 1:1) to afford chiral products.

## Synthetic Transformations

### Into aldehyde

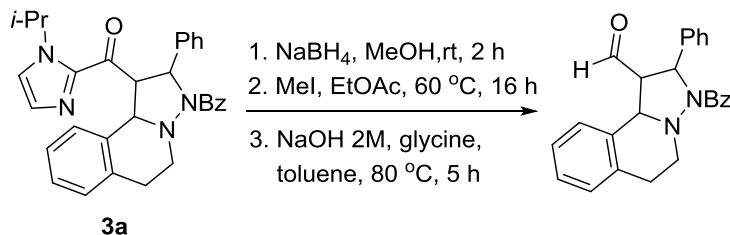

In a round bottom flask, sodium borohydride (0.16 mmol) was added portionwise to a solution of the substrate **3a** (0.06 mmol in methanol,  $c = 0.125$  M). The reaction was stirred at room temperature for 2 h and monitored by TLC. After completion, water was added and the mixture was extracted with ethyl acetate. The organic layer was further washed with brine, dried over magnesium sulfate and concentrated under vacuum. The intermediate so obtained was dissolved with ethyl acetate ( $c = 0.05$  M) and treated with methyl iodide (0.45 mmol). The mixture was heated at 60 °C for 16 h, cooled down to room temperature and concentrated to dryness. The crude residue was taken up in toluene ( $c = 0.17$  M), glycine (0.26 mmol) and 2 M NaOH solution (0.58 mmol) were added. The mixture was heated at 80 °C for 5 h. At 80 °C, 1 M HCl solution (0.58 mmol) was added and the mixture was stirred until lightening of the aqueous phase (from cloudy to clear). Then the mixture was cooled down to room temperature and ethyl acetate was added. The organic layer was washed with an aqueous solution of 1 M HCl and brine, dried over magnesium sulfate and concentrated under vacuum. The residue was purified by column chromatography to afford the desired product.

## Into amine

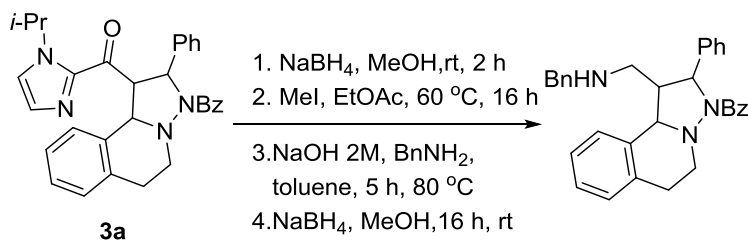

In a round bottom flask, sodium borohydride (0.18 mmol) was added portionwise to a solution of the substrate **3a** (0.07 mmol) in methanol (0.36 mL). The mixture was stirred at room temperature for 2 h and monitored by TLC. Water was added, the mixture was extracted with ethyl acetate. The organic layer was washed with brine, dried over magnesium sulfate and concentrated under vacuum. Ethyl acetate (0.56 mL) was added to the intermediate followed by methyl iodide (0.51 mmol). The mixture was heated at 60 °C for 16 h, cooled down to room temperature and concentrated to dryness. The residue was taken up in toluene (0.36 mL), benzylamine (0.29 mmol) and 2 M NaOH solution (0.36 mmol) were then added. The mixture was heated at 80 °C for 5 h and cooled down to room temperature. The organic layer was diluted with ethyl acetate, dried with brine and concentrated under vacuum. The residue was taken up in MeOH (0.36 mL) and sodium borohydride (0.73 mmol) was added at room temperature. The mixture was stirred at room temperature for 16 h. Water was added and the mixture was extracted with ethyl acetate. The combined organic layers were washed with brine, dried over magnesium sulfate and concentrated under vacuum. The residue was purified by column chromatography (petroleum ether/EtOAc = 5:1 to 1:1) to afford desired product.

## Characterization of Products

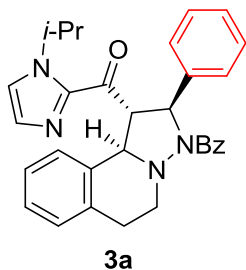

A dried 25 mL Schlenk tube was charged with  $\alpha,\beta$ -unsaturated 2-acylimidazole **1a** (12.0 mg, 0.05 mmol), C,N-cyclic azomethine imine **2a** (15 mg, 0.06 mmol) and chiral catalyst **A-Rh2** (1.03 mg, 2.0 mol%). The tube was purged with argon and anhydrous DCE (0.1 mL) was added. The reaction mixture was stirred at room temperature for 3 h (monitored by TLC) under argon. The mixture was purified by flash column chromatography on silica gel (petroleum ether/ EtOAc = 5:1 to 1:1) to afford chiral product **3a** as white solid (24.3 mg, yield: 99%). Enantiomeric excess was determined by HPLC analysis, ee = 98% (Chiralpak column IA,  $\lambda$  = 254 nm, *n*-hexane/*i*-PrOH = 70:30, flow rate: 1.0 mL/min, 30 °C, tr(minor) = 10.446 min, tr(major) = 11.599 min).  $[\alpha]_D^{25}$  (c 0.5, CHCl<sub>3</sub>) = -32.061. Mp 185–188 °C.

<sup>1</sup>H NMR (400 MHz, CDCl<sub>3</sub>)  $\delta$  7.89 (d, *J* = 6.8 Hz, 2H), 7.50-7.15 (m, 9H), 7.04 (brs, 3H), 6.84 (m, 1H), 6.51 (d, *J* = 7.7 Hz, 1H), 6.08 (d, *J* = 7.8 Hz, 1H), 5.73 (hept, 1H), 5.32 (dd, *J* = 7.8, 10.0 Hz, 1H), 4.83 (d, *J* = 10.0 Hz, 1H), 3.30 (m, 1H), 3.20 (m, 1H), 3.02 (m, 1H), 2.71 (d, *J* = 16.0 Hz, 1H), 1.54 (t, *J* = 7.3 Hz, 6H).

<sup>13</sup>C NMR (100 MHz, CDCl<sub>3</sub>)  $\delta$  191.0, 170.9, 142.9, 141.3, 135.6, 133.3, 132.9, 130.6, 130.2, 128.6, 128.5 (2C), 128.4 (2C), 127.6 (2C), 127.2, 127.0, 126.3, 126.1 (2C), 125.7, 122.5, 68.9, 68.0, 61.2, 49.9, 49.6, 29.5, 23.8, 23.7.

IR (KBr):  $\nu$  (cm<sup>-1</sup>) 2965, 1664, 1394, 989, 696.

HRMS (ESI, *m/z*) calcd for C<sub>31</sub>H<sub>30</sub>N<sub>4</sub>O<sub>2</sub>Na<sup>+</sup> [M+Na]<sup>+</sup>: 513.2261, found: 513.2261.



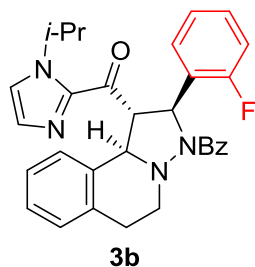

A dried 25 mL Schlenk tube was charged with  $\alpha,\beta$ -unsaturated 2-acylimidazole **1b** (12.9 mg, 0.05 mmol), C,N-cyclic azomethine imine **2a** (15 mg, 0.06 mmol) and chiral catalyst  **$\Delta$ -Rh2** (1.03 mg, 2.0 mol%). The tube was purged with argon and anhydrous DCE (0.1 mL) was added. The reaction mixture was stirred at room temperature for 4 h (monitored by TLC) under argon. The mixture was purified by flash column chromatography on silica gel (petroleum ether/ EtOAc = 5:1 to 1:1) to afford chiral product **3b** as white solid (22.8 mg, yield: 90%). Enantiomeric excess was determined by HPLC analysis, ee = 94% (Chiralpak column IC,  $\lambda$  = 254 nm, *n*-hexane/*i*-PrOH = 80:20, flow rate: 0.6 mL/min, 30 °C, tr(major) = 36.491 min, tr(minor) = 45.281 min).  $[\alpha]_D^{25}$  (c 0.5, CHCl<sub>3</sub>) = -11.832. Mp 173–176 °C.

<sup>1</sup>H NMR (400 MHz, CDCl<sub>3</sub>)  $\delta$  7.94 (d,  $J$  = 7.1 Hz, 2H), 7.47-7.36 (m, 4H), 7.30 (s, 1H), 7.20-7.00 (m, 4H), 6.93 (s, 1H), 6.88-6.80 (m, 2H), 6.54 (d,  $J$  = 7.8 Hz, 1H), 6.13 (d,  $J$  = 8.5 Hz, 1H), 5.75 (hept, 1H), 5.09 (dd,  $J$  = 8.5, 10.4 Hz, 1H), 4.88 (d,  $J$  = 10.4 Hz, 1H), 3.40 (m, 1H), 3.30 (m, 1H), 3.07 (m, 1H), 2.75 (d,  $J$  = 16.1 Hz, 1H), 1.56 (d,  $J$  = 8.8 Hz, 3H), 1.52 (d,  $J$  = 8.8 Hz, 3H).

<sup>13</sup>C NMR (100 MHz, CDCl<sub>3</sub>)  $\delta$  190.0 (d,  $J$  = 2.4 Hz), 169.6, 159.8 (d,  $J$  = 244 Hz), 143.1, 135.2, 132.6 (d,  $J$  = 3.5 Hz), 130.3, 130.0, 128.7 (d,  $J$  = 8.1 Hz), 128.5 (2C), 128.42, 128.35, 128.2, 127.6 (2C), 127.2, 126.5, 126.2 (d,  $J$  = 3.9 Hz), 125.6, 124.0 (d,  $J$  = 3.3 Hz), 122.0, 115.2 (d,  $J$  = 21.2 Hz), 68.2, 63.7, 60.4, 50.0, 49.5, 29.4, 23.7, 23.4.

IR (KBr):  $\nu$  (cm<sup>-1</sup>) 2952, 1664, 1488, 1396, 1255, 991, 757, 696.

HRMS (ESI,  $m/z$ ) calcd for C<sub>31</sub>H<sub>29</sub>FN<sub>4</sub>O<sub>2</sub>Na<sup>+</sup> [M+Na]<sup>+</sup>: 531.2167, found: 531.2166.

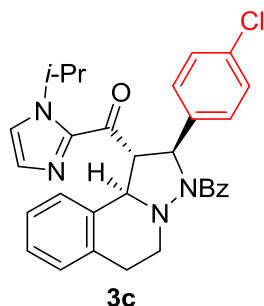

A dried 25 mL Schlenk tube was charged with  $\alpha,\beta$ -unsaturated 2-acylimidazole **1c** (13.7 mg, 0.05 mmol), C,N-cyclic azomethine imine **2a** (15 mg, 0.06 mmol) and chiral catalyst **A-Rh2** (1.03 mg, 2.0 mol%). The tube was purged with argon and anhydrous DCE (0.1 mL) was added. The reaction mixture was stirred at room temperature for 4 h (monitored by TLC) under argon. The mixture was purified by flash column chromatography on silica gel (petroleum ether/ EtOAc = 5:1 to 1:1) to afford chiral product **3c** as white solid (24.7 mg, yield: 95%). Enantiomeric excess was determined by HPLC analysis, ee = 96% (Chiralpak column IA,  $\lambda$  = 254 nm, *n*-hexane/*i*-PrOH = 80:20, flow rate: 0.6 mL/min, 30 °C, tr(minor) = 31.593 min, tr(major) = 42.447 min).  $[\alpha]_D^{25}$  (c 0.5, CHCl<sub>3</sub>) = -28.305. Mp 169–172 °C.

<sup>1</sup>H NMR (400 MHz, CDCl<sub>3</sub>)  $\delta$  7.89 (d,  $J$  = 7.2 Hz, 2H), 7.47-7.32 (m, 6H), 7.28-7.20 (m, 2H), 7.06 (m, 3H), 6.85 (m, 1H), 6.51 (d,  $J$  = 7.8 Hz, 1H), 6.00 (d,  $J$  = 8.0 Hz, 1H), 5.71 (hept, 1H), 5.29 (dd,  $J$  = 10.0, 8.0 Hz, 1H), 4.83 (d,  $J$  = 10.0 Hz, 1H), 3.29 (dd,  $J$  = 5.0, 10.6 Hz, 1H), 3.17 (ddd,  $J$  = 2.6, 10.6, 12.5 Hz, 1H), 3.03 (ddd,  $J$  = 5.0, 12.5, 16.0 Hz, 1H), 2.72 (d,  $J$  = 16.0 Hz, 1H), 1.55 (t,  $J$  = 6.8 Hz, 6H).

<sup>13</sup>C NMR (100 MHz, CDCl<sub>3</sub>)  $\delta$  190.6, 170.8, 142.8, 139.9, 135.3, 133.1, 132.9, 132.8, 130.6, 130.4, 128.6, 128.5 (2C), 127.7 (4C), 127.3, 126.2, 125.8, 122.6, 68.8, 67.6, 60.9, 50.0, 49.7, 29.4, 23.8, 23.7.

IR (KBr):  $\nu$  (cm<sup>-1</sup>) 2927, 1662, 1545, 1491, 1395, 1254, 1013, 990, 764, 737.

HRMS (ESI,  $m/z$ ) calcd for C<sub>31</sub>H<sub>29</sub>ClN<sub>4</sub>O<sub>2</sub>Na<sup>+</sup> [M+Na]<sup>+</sup>: 547.1871, found: 547.1870.

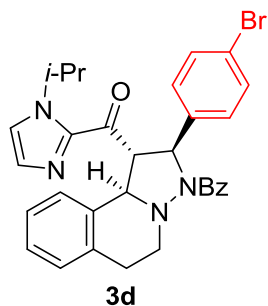

A dried 25 mL Schlenk tube was charged with  $\alpha,\beta$ -unsaturated 2-acylimidazole **1d** (15.96 mg, 0.05 mmol), C,N-cyclic azomethine imine **2a** (15 mg, 0.06 mmol) and chiral catalyst  $\Delta$ -**Rh2** (1.03 mg, 2.0 mol%). The tube was purged with argon and anhydrous DCE (0.1 mL) was added. The reaction mixture was stirred at room temperature for 5 h (monitored by TLC) under argon. The mixture was purified by flash column chromatography on silica gel (petroleum ether/ EtOAc = 5:1 to 1:1) to afford chiral product **3d** as off white solid (26.9 mg, yield: 95%). Enantiomeric excess was determined by HPLC analysis, ee = 92% (Chiralpak column IC,  $\lambda$  = 254 nm, *n*-hexane/*i*-PrOH = 80:20, flow rate: 1.0 mL/min, 30 °C, tr(major) = 14.522 min, tr(minor) = 17.334 min).  $[\alpha]_D^{25}$  (c 0.5, CHCl<sub>3</sub>) = +25.733. Mp 170–172 °C.

<sup>1</sup>H NMR (400 MHz, CDCl<sub>3</sub>)  $\delta$  7.89 (d, *J* = 7.1 Hz, 2H), 7.47-7.27 (m, 8H), 7.05 (m, 3H), 6.85 (m, 1H), 6.51 (d, *J* = 7.7 Hz, 1H), 5.98 (d, *J* = 8.0 Hz, 1H), 5.71 (hept, 1H), 5.29 (dd, *J* = 10.0, 8.0 Hz, 1H), 4.83 (d, *J* = 10.0 Hz, 1H), 3.29 (m, 1H), 3.17 (ddd, *J* = 3.0, 10.4, 12.0 Hz, 1H), 3.03 (ddd, *J* = 5.2, 12.0, 16.0 Hz, 1H), 2.72 (d, *J* = 16.0 Hz, 1H), 1.54 (t, *J* = 6.8 Hz, 6H).

<sup>13</sup>C NMR (100 MHz, CDCl<sub>3</sub>)  $\delta$  190.6, 170.8, 142.8, 140.4, 135.3, 133.1, 132.8, 131.5 (2C), 130.7, 130.4, 128.6, 128.55 (2C), 128.0 (2C), 127.7 (2C), 127.3, 126.2, 125.8, 122.7, 121.0, 68.8, 67.6, 60.8, 50.0, 49.7, 29.4, 23.8, 23.7.

IR (KBr):  $\nu$  (cm<sup>-1</sup>) 2931, 1663, 1489, 1447, 1395, 1255, 1163, 1074, 1010, 990, 766, 670.

HRMS (ESI, *m/z*) calcd for C<sub>31</sub>H<sub>29</sub>BrN<sub>4</sub>O<sub>2</sub>Na<sup>+</sup> [M+Na]<sup>+</sup>: 591.1366, found: 591.1364.

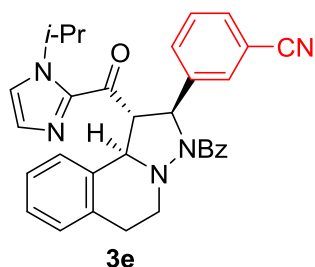

A dried 25 mL Schlenk tube was charged with  $\alpha,\beta$ -unsaturated 2-acylimidazole **1e** (13.2 mg, 0.05 mmol), C,N-cyclic azomethine imine **2a** (15 mg, 0.06 mmol) and chiral catalyst  **$\Delta$ -Rh2** (1.03 mg, 2.0 mol%). The tube was purged with argon and anhydrous DCE (0.1 mL) was added. The reaction mixture was stirred at room temperature for 4 h (monitored by TLC) under argon. The mixture was purified by flash column chromatography on silica gel (petroleum ether/ EtOAc = 5:1 to 1:1) to afford chiral product **3e** as colorless oil (24.5 mg, yield: 96%). Enantiomeric excess was determined by HPLC analysis, ee = 93% (Chiralpak column IC,  $\lambda$  = 254 nm, *n*-hexane/*i*-PrOH = 70:30, flow rate: 1.0 mL/min, 30 °C, tr(major) = 16.823 min, tr(minor) = 28.729 min).  $[\alpha]_D^{25}$  (c 0.5, CHCl<sub>3</sub>) = -11.193.

<sup>1</sup>H NMR (400 MHz, CDCl<sub>3</sub>)  $\delta$  7.91 (d, *J* = 7.1 Hz, 2H), 7.72 (s, 1H), 7.64 (d, *J* = 8.0 Hz, 1H), 7.54-7.34 (m, 6H), 7.07 (m, 3H), 6.86 (m, 1H), 6.53 (d, *J* = 7.7 Hz, 1H), 6.02 (d, *J* = 8.1 Hz, 1H), 5.72 (hept, 1H), 5.28 (dd, *J* = 10.0, 8.1 Hz, 1H), 4.87 (d, *J* = 10.0 Hz, 1H), 3.33 (m, 1H), 3.19-2.99 (m, 2H), 2.75 (d, *J* = 15.5 Hz, 1H), 1.57 (d, *J* = 6.6 Hz, 6H).

<sup>13</sup>C NMR (100 MHz, CDCl<sub>3</sub>)  $\delta$  190.1, 170.9, 143.0, 142.7, 134.8, 132.8, 132.7, 130.9, 130.8, 130.7, 129.9, 129.3, 128.7 (2C), 127.7 (2C), 127.4, 126.2, 125.9, 123.0, 118.9, 112.5, 68.6, 67.4, 60.7, 50.2, 49.8, 29.4, 23.9, 23.6.

IR (KBr):  $\nu$  (cm<sup>-1</sup>) 2979, 2932, 1662, 1601, 1395, 1349, 1255, 1194, 1088, 991, 732.

HRMS (ESI, *m/z*) calcd for C<sub>32</sub>H<sub>29</sub>N<sub>5</sub>O<sub>2</sub>Na<sup>+</sup> [M+Na]<sup>+</sup>: 538.2213, found: 538.2213.

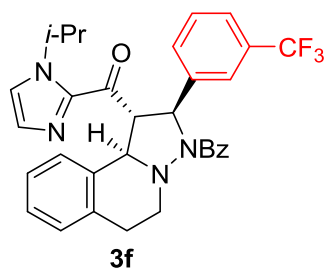

A dried 25 mL Schlenk tube was charged with  $\alpha,\beta$ -unsaturated 2-acylimidazole **1f** (15.4 mg, 0.05 mmol), C,N-cyclic azomethine imine **2a** (15 mg, 0.06 mmol) and chiral catalyst  $\Delta$ -**Rh2** (1.03 mg, 2.0 mol%). The tube was purged with argon and anhydrous DCE (0.1 mL) was added. The reaction mixture was stirred at room temperature for 4 h (monitored by TLC) under argon. The mixture was purified by flash column chromatography on silica gel (petroleum ether/ EtOAc = 5:1 to 1:1) to afford chiral product **3f** as white solid (27.5 mg, yield: 99%). Enantiomeric excess was determined by HPLC analysis, ee = 99% (Chiralpak column IC,  $\lambda$  = 254 nm, *n*-hexane/*i*-PrOH = 80:20, flow rate: 1.0 mL/min, 30 °C, tr(major) = 7.534 min, tr(minor) = 9.089 min).  $[\alpha]_D^{25}$  (*c* 0.5, CHCl<sub>3</sub>) = -22.6. Mp 130–133 °C.

<sup>1</sup>H NMR (400 MHz, CDCl<sub>3</sub>)  $\delta$  7.92 (d, *J* = 7.2 Hz, 2H), 7.66 (s, 1H), 7.60 (d, *J* = 7.6 Hz, 1H), 7.50–7.32 (m, 6H), 7.05 (m, 3H), 6.87 (m, 1H), 6.57 (d, *J* = 7.8 Hz, 1H), 6.05 (d, *J* = 8.1 Hz, 1H), 5.72 (hept, 1H), 5.32 (dd, *J* = 10.0, 8.1 Hz, 1H), 4.89 (d, *J* = 10.0 Hz, 1H), 3.33 (m, 1H), 3.16 (ddd, *J* = 2.4, 10.2, 12.2 Hz, 1H), 3.04 (ddd, *J* = 5.0, 12.2, 16.0 Hz, 1H), 2.73 (d, *J* = 16.0 Hz, 1H), 1.54 (t, *J* = 6.8 Hz, 6H).

<sup>13</sup>C NMR (100 MHz, CDCl<sub>3</sub>)  $\delta$  190.4, 170.9, 142.6, 142.2, 135.0, 132.9, 132.7, 130.6, 130.48 (q, *J* = 32 Hz), 130.46, 129.3, 128.9, 128.53, 128.51 (2C), 127.6 (2C), 127.2, 126.1, 125.8, 124.0 (q, *J* = 271 Hz), 123.9 (q, *J* = 3.6 Hz), 123.0 (q, *J* = 3.8 Hz), 122.8, 68.3, 67.8, 60.7, 49.9, 49.6, 29.3, 23.7, 23.5.

IR (KBr):  $\nu$  (cm<sup>-1</sup>) 2985, 1656, 1397, 1325, 1165, 113, 1068, 768.

HRMS (ESI, *m/z*) calcd for C<sub>32</sub>H<sub>29</sub>F<sub>3</sub>N<sub>4</sub>O<sub>2</sub>Na<sup>+</sup> [M+Na]<sup>+</sup>: 581.2135, found: 581.2134.

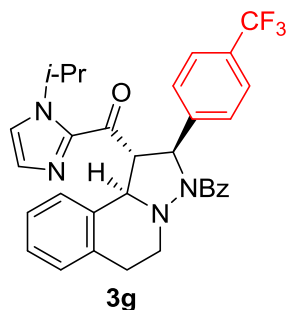

A dried 25 mL Schlenk tube was charged with  $\alpha,\beta$ -unsaturated 2-acylimidazole **1g** (15.4 mg, 0.05 mmol), C,N-cyclic azomethine imine **2a** (15 mg, 0.06 mmol) and chiral catalyst **A-Rh2** (1.03 mg, 2.0 mol%). The tube was purged with argon and anhydrous DCE (0.1 mL) was added. The reaction mixture was stirred at room temperature for 5 h (monitored by TLC) under argon. The mixture was purified by flash column chromatography on silica gel (petroleum ether/ EtOAc = 5:1 to 1:1) to afford chiral product **3g** as colorless oil (26.9 mg, yield: 97%). Enantiomeric excess was determined by HPLC analysis, ee = 99% (Chiralpak column IC,  $\lambda$  = 254 nm, *n*-hexane/*i*-PrOH = 80:20, flow rate: 1.0 mL/min, 30 °C, tr(major) = 8.987 min, tr(minor) = 10.657 min).  $[\alpha]_D^{25}$  (c 0.5, CHCl<sub>3</sub>) = -22.786.

<sup>1</sup>H NMR (400 MHz, CDCl<sub>3</sub>)  $\delta$  7.91 (d, *J* = 7.2 Hz, 2H), 7.58-7.35 (m, 8H), 7.05 (m, 3H), 6.85 (m, 1H), 6.51 (d, *J* = 7.8 Hz, 1H), 6.10 (d, *J* = 8.0 Hz, 1H), 5.72 (hept, 1H), 5.32 (dd, *J* = 10.0, 8.0 Hz, 1H), 4.85 (d, *J* = 10.0 Hz, 1H), 3.32 (dd, *J* = 3.5, 10.2 Hz, 1H), 3.15 (ddd, *J* = 2.6, 10.2, 12.2 Hz, 1H), 3.04 (ddd, *J* = 4.8, 12.2, 16.0 Hz, 1H), 2.73 (d, *J* = 16.0 Hz, 1H), 1.56 (d, *J* = 6.4 Hz, 3H), 1.54 (d, *J* = 6.4 Hz, 3H).

<sup>13</sup>C NMR (100 MHz, CDCl<sub>3</sub>)  $\delta$  190.4, 170.8, 145.3, 142.7, 135.1, 132.9, 132.7, 130.7, 130.5, 129.3 (q, *J* = 32 Hz), 128.6 (2C), 127.7 (2C), 127.3, 126.5 (2C), 126.2, 125.8, 125.4 (q, *J* = 3.7 Hz), 124.1 (q, *J* = 270 Hz), 122.7, 68.8, 67.6, 60.8, 50.0, 49.7, 29.4, 23.8, 23.6.

IR (KBr):  $\nu$  (cm<sup>-1</sup>) 2980, 1751, 1395, 1324, 1258, 1068, 764.

HRMS (ESI, *m/z*) calcd for C<sub>32</sub>H<sub>29</sub>F<sub>3</sub>N<sub>4</sub>O<sub>2</sub>Na<sup>+</sup> [M+Na]<sup>+</sup>: 581.2135, found: 581.2134.

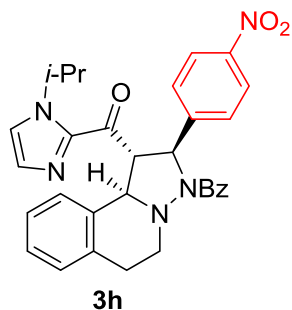

A dried 25 mL Schlenk tube was charged with  $\alpha,\beta$ -unsaturated 2-acylimidazole **1h** (14.2 mg, 0.05 mmol), C,N-cyclic azomethine imine **2a** (15 mg, 0.06 mmol) and chiral catalyst **A-Rh2** (1.03 mg, 2.0 mol%). The tube was purged with argon and anhydrous DCE (0.1 mL) was added. The reaction mixture was stirred at room temperature for 4 h (monitored by TLC) under argon. The mixture was purified by flash column chromatography on silica gel (petroleum ether/ EtOAc = 5:1 to 1:1) to afford chiral product **3h** as yellow oil (25.0 mg, yield: 94%). Enantiomeric excess was determined by HPLC analysis, ee = 93% (Chiralpak column IC,  $\lambda$  = 254 nm, *n*-hexane/*i*-PrOH = 70:30, flow rate: 1.0 mL/min, 30 °C, tr(major) = 24.444 min, tr(minor) = 27.461 min).  $[\alpha]_D^{25}$  (*c* 0.5, CHCl<sub>3</sub>) = +22.307.

<sup>1</sup>H NMR (400 MHz, CDCl<sub>3</sub>)  $\delta$  8.14 (d, *J* = 8.8 Hz, 2H), 7.93 (d, *J* = 7.1 Hz, 2H), 7.58 (d, *J* = 8.6 Hz, 2H), 7.49-7.35 (m, 4H), 7.12-7.02 (m, 3H), 6.86 (m, 1H), 6.53 (d, *J* = 7.8 Hz, 1H), 6.08 (d, *J* = 8.2 Hz, 1H), 5.72 (hept, 1H), 5.31 (dd, *J* = 10.0, 8.2 Hz, 1H), 4.88 (d, *J* = 10.0 Hz, 1H), 3.33 (m, 1H), 3.20-3.00 (m, 2H), 2.75 (m, 1H), 1.57 (d, *J* = 6.6 Hz, 3H), 1.56 (d, *J* = 6.6 Hz, 3H).

<sup>13</sup>C NMR (100 MHz, CDCl<sub>3</sub>)  $\delta$  190.0, 170.8, 148.8, 147.1, 142.7, 134.8, 132.7, 130.8, 130.7, 128.7 (2C), 127.8 (2C), 127.5, 127.2 (2C), 126.2, 125.9, 123.8 (2C), 123.0, 68.7, 67.7, 60.5, 50.2, 49.8, 29.4, 23.8, 23.7.

IR (KBr):  $\nu$  (cm<sup>-1</sup>) 2932, 1663, 1601, 1520, 1493, 1396, 1345, 1254, 1109, 990, 816, 748, 736, 696.

HRMS (ESI, *m/z*) calcd for C<sub>31</sub>H<sub>29</sub>N<sub>5</sub>O<sub>4</sub>Na<sup>+</sup> [M+Na]<sup>+</sup>: 558.2112, found: 558.2112.

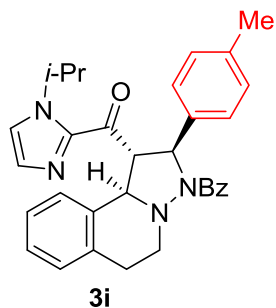

A dried 25 mL Schlenk tube was charged with  $\alpha,\beta$ -unsaturated 2-acylimidazole **1i** (12.7 mg, 0.05 mmol), C,N-cyclic azomethine imine **2a** (15 mg, 0.06 mmol) and chiral catalyst  **$\Delta$ -Rh2** (1.03 mg, 2.0 mol%). The tube was purged with argon and anhydrous DCE (0.1 mL) was added. The reaction mixture was stirred at room temperature for 4 h (monitored by TLC) under argon. The mixture was purified by flash column chromatography on silica gel (petroleum ether/ EtOAc = 5:1 to 1:1) to afford chiral product **3i** as white solid (24.6 mg, yield: 98%). Enantiomeric excess was determined by HPLC analysis, ee = 97% (Chiralpak column IC,  $\lambda$  = 254 nm, *n*-hexane/*i*-PrOH = 80:20, flow rate: 0.8 mL/min, 30 °C, tr(minor) = 27.737 min, tr(major) = 35.721 min).  $[\alpha]_D^{25}$  (*c* 0.5, CHCl<sub>3</sub>) = -28.152. Mp 166–168 °C.

<sup>1</sup>H NMR (400 MHz, CDCl<sub>3</sub>)  $\delta$  7.87 (d, *J* = 7.1 Hz, 2H), 7.45-7.25 (m, 6H), 7.10-7.02 (m, 5H), 6.84 (m, 1H), 6.51 (d, *J* = 7.8 Hz, 1H), 6.02 (d, *J* = 8.0 Hz, 1H), 5.72 (hept, 1H), 5.32 (dd, *J* = 10.0, 8.0 Hz, 1H), 4.82 (d, *J* = 10.0 Hz, 1H), 3.34-3.18 (m, 2H), 3.01 (ddd, *J* = 5.5, 12.2, 16.0 Hz, 1H), 2.71 (d, *J* = 16.0 Hz, 1H), 2.28 (s, 3H), 1.55 (d, *J* = 6.7 Hz, 3H), 1.53 (d, *J* = 6.7 Hz, 3H).

<sup>13</sup>C NMR (100 MHz, CDCl<sub>3</sub>)  $\delta$  191.1, 170.8, 142.9, 138.3, 136.6, 135.7, 133.3, 132.9, 130.5, 130.2, 129.1 (2C), 128.6, 128.5 (2C), 127.6 (2C), 127.2, 126.3, 126.1 (2C), 125.7, 122.4, 68.8, 67.9, 61.1, 49.9, 49.6, 29.5, 23.8, 23.7, 21.0.

IR (KBr):  $\nu$  (cm<sup>-1</sup>) 2948, 1661, 1395, 1254, 990, 766.

HRMS (ESI, *m/z*) calcd for C<sub>32</sub>H<sub>32</sub>N<sub>4</sub>O<sub>2</sub>Na<sup>+</sup> [M+Na]<sup>+</sup>: 527.2417, found: 527.2417.



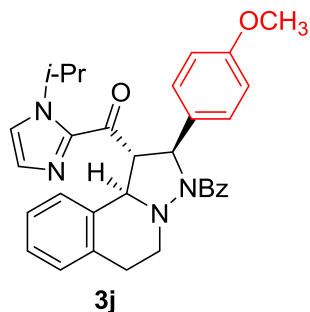

A dried 25 mL Schlenk tube was charged with  $\alpha,\beta$ -unsaturated 2-acylimidazole **1j** (13.5 mg, 0.05 mmol), C,N-cyclic azomethine imine **2a** (15 mg, 0.06 mmol) and chiral catalyst **A-Rh2** (1.03 mg, 2.0 mol%). The tube was purged with argon and anhydrous DCE (0.1 mL) was added. The reaction mixture was stirred at room temperature for 4 h (monitored by TLC) under argon. The mixture was purified by flash column chromatography on silica gel (petroleum ether/ EtOAc = 5:1 to 1:1) to afford chiral product **3j** as off white solid (25.4 mg, yield: 98%). Enantiomeric excess was determined by HPLC analysis, ee = 96% (Chiralpak column IC,  $\lambda$  = 254 nm, *n*-hexane/*i*-PrOH = 80:20, flow rate: 1.0 mL/min, 30 °C,  $t_r$ (major) = 28.347 min,  $t_r$ (minor) = 32.594 min).  $[\alpha]_D^{25}$  (*c* 0.5, CHCl<sub>3</sub>) = -9.034. Mp 173–175 °C.

<sup>1</sup>H NMR (400 MHz, CDCl<sub>3</sub>)  $\delta$  7.87 (d, *J* = 7.1 Hz, 2H), 7.45-7.30 (m, 6H), 7.05 (m, 3H), 6.88-6.77 (m, 3H), 6.52 (d, *J* = 7.8 Hz, 1H), 5.99 (d, *J* = 8.0 Hz, 1H), 5.71 (hept, 1H), 5.33 (dd, *J* = 10.0, 8.0 Hz, 1H), 4.83 (d, *J* = 10.0 Hz, 1H), 3.75 (s, 3H), 3.36-3.18 (m, 2H), 3.02 (ddd, *J* = 5.7, 12.0, 16.2 Hz, 1H), 2.71 (d, *J* = 16.2 Hz, 1H), 1.55 (d, *J* = 6.6 Hz, 3H), 1.52 (d, *J* = 6.6 Hz, 3H).

<sup>13</sup>C NMR (100 MHz, CDCl<sub>3</sub>)  $\delta$  191.1, 170.8, 158.6, 142.9, 135.7, 133.4, 133.3, 132.9, 130.5, 130.2, 128.6, 128.5 (2C), 127.6 (2C), 127.5 (2C), 127.2, 126.3, 125.7, 122.4, 113.8 (2C), 68.7, 67.8, 61.1, 55.3, 49.95, 49.6, 29.5, 23.8, 23.7.

IR (KBr):  $\nu$  (cm<sup>-1</sup>) 2932, 1662, 1512, 1394, 1250, 1032, 669.

HRMS (ESI, *m/z*) calcd for C<sub>32</sub>H<sub>32</sub>N<sub>4</sub>O<sub>3</sub>Na<sup>+</sup> [M+Na]<sup>+</sup>: 543.2367, found: 543.2364.

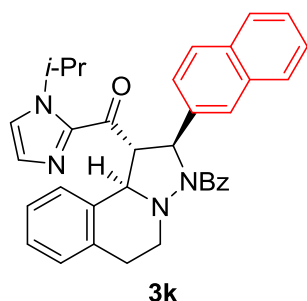

A dried 25 mL Schlenk tube was charged with  $\alpha,\beta$ -unsaturated 2-acylimidazole **1k** (14.5 mg, 0.05 mmol), C,N-cyclic azomethine imine **2a** (15 mg, 0.06 mmol) and chiral catalyst  **$\Delta$ -Rh2** (1.03 mg, 2.0 mol%). The tube was purged with argon and anhydrous DCE (0.1 mL) was added. The reaction mixture was stirred at room temperature for 5 h (monitored by TLC) under argon. The mixture was purified by flash column chromatography on silica gel (petroleum ether/ EtOAc = 5:1 to 1:1) to afford chiral product **3k** as yellow solid (25 mg, yield: 93%). Enantiomeric excess was determined by HPLC analysis, ee = 95% (Chiralpak column IC,  $\lambda$  = 254 nm, *n*-hexane/*i*-PrOH = 80:20, flow rate: 0.8 mL/min, 30 °C, tr(major) = 25.076 min, tr(minor) = 32.961 min).  $[\alpha]_D^{25}$  (*c* 0.5, CHCl<sub>3</sub>) = +38.135. Mp 180–183 °C.

<sup>1</sup>H NMR (400 MHz, CDCl<sub>3</sub>)  $\delta$  7.92 (m, 3H), 7.76 (m, 3H), 7.52 (d, *J* = 8.5 Hz, 1H), 7.48-7.35 (m, 5H), 7.33 (s, 1H), 7.05 (m, 3H), 6.86 (m, 1H), 6.55 (d, *J* = 7.8 Hz, 1H), 6.23 (d, *J* = 8.0 Hz, 1H), 5.74 (hept, 1H), 5.47 (dd, *J* = 10.0, 8.0 Hz, 1H), 4.89 (d, *J* = 10.0 Hz, 1H), 3.42-3.22 (m, 2H), 3.04 (ddd, *J* = 5.3, 12.2, 16.2 Hz, 1H), 2.71 (d, *J* = 16.2 Hz, 1H), 1.57 (d, *J* = 6.8 Hz, 3H), 1.54 (d, *J* = 6.8 Hz, 3H).

<sup>13</sup>C NMR (101 MHz, CDCl<sub>3</sub>)  $\delta$  191.0, 171.1, 142.9, 138.8, 135.6, 133.3, 132.9, 132.7, 130.6, 130.3, 128.6, 128.57 (2C), 128.2, 128.1, 127.6 (2C), 127.5, 127.2, 126.3, 126.0, 125.8, 125.7, 124.8 (2C), 122.5, 68.9, 68.3, 61.0, 50.0, 49.7, 29.5, 23.8, 23.7.

IR (KBr):  $\nu$  (cm<sup>-1</sup>) 2931, 1660, 1493, 1448, 1395, 1255, 1163, 1075, 991, 916, 838, 766, 697, 667, 477.

HRMS (ESI, *m/z*) calcd for C<sub>35</sub>H<sub>32</sub>N<sub>4</sub>O<sub>2</sub>Na<sup>+</sup> [M+Na]<sup>+</sup>: 563.2417, found: 563.2416.

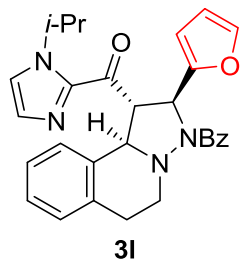

A dried 25 mL Schlenk tube was charged with  $\alpha,\beta$ -unsaturated 2-acylimidazole **11** (11.5 mg, 0.05 mmol), C,N-cyclic azomethine imine **2a** (15 mg, 0.06 mmol) and chiral catalyst  **$\Delta$ -Rh2** (1.03 mg, 2.0 mol%). The tube was purged with argon and anhydrous DCE (0.1 mL) was added. The reaction mixture was stirred at room temperature for 5 h (monitored by TLC) under argon. The mixture was purified by flash column chromatography on silica gel (petroleum ether/ EtOAc = 5:1 to 1:1) to afford chiral product **31** as light brown solid (22.9 mg, yield: 96%). Enantiomeric excess was determined by HPLC analysis, ee = 96% (Chiralpak column IC,  $\lambda$  = 254 nm, *n*-hexane/*i*-PrOH = 60:40, flow rate: 1.0 mL/min, 30 °C, tr(major) = 7.842 min, tr(minor) = 12.669 min).  $[\alpha]_D^{25}$  (c 0.5, CHCl<sub>3</sub>) = -31.422. Mp 195–198 °C.

<sup>1</sup>H NMR (400 MHz, CDCl<sub>3</sub>)  $\delta$  7.84 (d, *J* = 6.9 Hz, 2H), 7.48-7.26 (m, 5H), 7.08 (brs, 2H), 7.01 (s, 1H), 6.88 (m, 1H), 6.59 (d, *J* = 7.7 Hz, 1H), 6.39 (s, 1H), 6.27 (s, 1H), 5.92 (d, *J* = 8.1 Hz, 1H), 5.66 (hept, 1H), 5.50 (dd, *J* = 8.1, 10.2 Hz, 1H), 4.84 (d, *J* = 10.2 Hz, 1H), 3.61 (m, 1H), 3.25 (m, 1H), 3.03 (m, 1H), 2.78 (d, *J* = 16.1 Hz, 1H), 1.53 (d, *J* = 6.6 Hz, 3H), 1.49 (d, *J* = 6.6 Hz, 3H).

<sup>13</sup>C NMR (100 MHz, CDCl<sub>3</sub>)  $\delta$  190.2, 170.0, 152.3, 142.8, 142.1, 135.3, 133.3, 133.0, 130.5, 130.3, 128.6, 128.5 (2C), 127.6 (2C), 127.2, 126.4, 125.8, 122.4, 110.5, 108.4, 67.6, 61.5, 58.4, 49.6, 49.3, 29.4, 23.80, 23.6.

IR (KBr):  $\nu$  (cm<sup>-1</sup>) 2968, 1662, 1448, 1396, 1255, 1011, 768.

HRMS (ESI, *m/z*) calcd for C<sub>29</sub>H<sub>28</sub>N<sub>4</sub>O<sub>3</sub>Na<sup>+</sup> [M+Na]<sup>+</sup>: 503.2054, found: 503.2054.

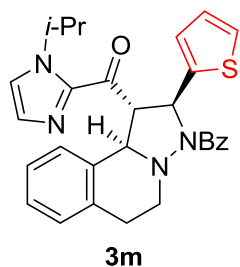

A dried 25 mL Schlenk tube was charged with  $\alpha,\beta$ -unsaturated 2-acylimidazole **1m** (12.3 mg, 0.05 mmol), C,N-cyclic azomethine imine **2a** (15 mg, 0.06 mmol) and chiral catalyst  **$\Delta$ -Rh2** (1.03 mg, 2.0 mol%). The tube was purged with argon and anhydrous DCE (0.1 mL) was added. The reaction mixture was stirred at room temperature for 5 h (monitored by TLC) under argon. The mixture was purified by flash column chromatography on silica gel (petroleum ether/ EtOAc = 5:1 to 1:1) to afford chiral product **3m** as white solid (23.2 mg, yield: 94%). Enantiomeric excess was determined by HPLC analysis, ee = 95% (Chiralpak column IC,  $\lambda$  = 254 nm, *n*-hexane/*i*-PrOH = 80:20, flow rate: 0.8 mL/min, 30 °C, tr(major) = 21.846 min, tr(minor) = 26.315 min).  $[\alpha]_D^{25}$  (c 0.5, CHCl<sub>3</sub>) = -31.661. Mp 200–202 °C.

<sup>1</sup>H NMR (400 MHz, CDCl<sub>3</sub>)  $\delta$  7.86 (d, *J* = 6.9 Hz, 2H), 7.45-7.32 (m, 4H), 7.24-7.16 (m, 2H), 7.12-7.04 (m, 3H), 6.92-6.83 (m, 2H), 6.54 (d, *J* = 7.7 Hz, 1H), 6.17 (d, *J* = 8.0 Hz, 1H), 5.68 (hept, 1H), 5.56 (dd, *J* = 10.1, 8.0 Hz, 1H), 4.82 (d, *J* = 10.1 Hz, 1H), 3.41 (ddd, *J* = 3.3, 10.8, 12.5 Hz, 1H), 3.31 (ddd, *J* = 1.8, 5.4, 10.8 Hz, 1H), 3.02 (ddd, *J* = 5.4, 12.5, 16.0 Hz, 1H), 2.75 (d, *J* = 16.0 Hz, 1H), 1.55 (d, *J* = 6.6 Hz, 3H), 1.51 (d, *J* = 6.6 Hz, 3H).

<sup>13</sup>C NMR (100 MHz, CDCl<sub>3</sub>)  $\delta$  190.3, 170.5, 145.6, 142.9, 135.3, 133.2, 132.9, 130.6, 130.3, 128.7, 128.5 (2C), 127.6 (2C), 127.3, 126.6, 126.3, 125.8, 125.0, 124.9, 122.6, 68.6, 64.0, 60.9, 50.0, 49.6, 29.5, 23.8, 23.6.

IR (KBr):  $\nu$  (cm<sup>-1</sup>) 2932, 1661, 1493, 1447, 1396, 1164, 988, 917, 847, 767, 698.

HRMS (ESI, *m/z*) calcd for C<sub>29</sub>H<sub>28</sub>N<sub>4</sub>O<sub>2</sub>SN<sup>+</sup> [M+Na]<sup>+</sup>: 519.1825, found: 519.1822.

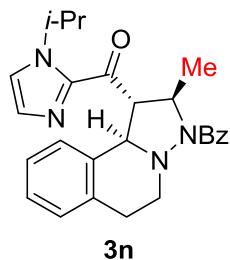

A dried 25 mL Schlenk tube was charged with  $\alpha,\beta$ -unsaturated 2-acylimidazole **1n** (8.9 mg, 0.05 mmol), C,N-cyclic azomethine imine **2a** (15.0 mg, 0.06 mmol) and chiral catalyst  **$\Delta$ -Rh2** (1.03 mg, 2.0 mol%). The tube was purged with argon and anhydrous DCE (0.1 mL) was added. The reaction mixture was stirred at room temperature for 5 h (monitored by TLC) under argon. The mixture was purified by flash column chromatography on silica gel (petroleum ether/ EtOAc = 5:1 to 1:1) to afford chiral product **3n** as colorless oil (19.6 mg, yield: 95%). Enantiomeric excess was determined by HPLC analysis, ee = 99.6% (Chiralpak column IC,  $\lambda$  = 254 nm, *n*-hexane/*i*-PrOH = 80:20, flow rate: 1.0 mL/min, 30 °C, tr(major) = 15.490 min, tr(minor) = 21.922 min).  $[\alpha]_D^{25}$  (*c* 0.5, CHCl<sub>3</sub>) = -25.836.

<sup>1</sup>H NMR (400 MHz, CDCl<sub>3</sub>)  $\delta$  7.83 (d, *J* = 6.7 Hz, 2H), 7.43-7.32 (m, 4H), 7.16-7.04 (m, 3H), 6.95 (m, 1H), 6.78 (d, *J* = 7.8 Hz, 1H), 5.67 (hept, 1H), 4.96 (d, *J* = 10.4 Hz, 1H), 4.90 (dd, *J* = 7.7, 10.4 Hz, 1H), 4.62 (dq, *J* = 7.7, 6.5 Hz, 1H), 3.34 (m, 1H), 3.20 (m, 1H), 2.95 (ddd, *J* = 5.2, 12.4, 16.0 Hz, 1H), 2.70 (d, *J* = 16.0 Hz, 1H), 1.73 (d, *J* = 6.5 Hz, 3H), 1.54 (d, *J* = 6.7 Hz, 3H), 1.52 (d, *J* = 6.7 Hz, 3H).

<sup>13</sup>C NMR (100 MHz, CDCl<sub>3</sub>)  $\delta$  190.8, 168.9, 143.0, 135.7, 134.3, 133.0, 130.4, 130.0, 128.5, 128.4 (2C), 127.6 (2C), 127.1, 126.2, 126.1, 122.4, 65.4, 61.6, 60.8, 50.3, 49.6, 29.6, 23.8, 23.6, 22.7.

IR (KBr):  $\nu$  (cm<sup>-1</sup>) 2974, 2931, 1665, 1573, 1449, 1395, 1255, 1127, 1019, 916, 829, 766, 712, 669.

HRMS (ESI, *m/z*) calcd for C<sub>26</sub>H<sub>28</sub>N<sub>4</sub>O<sub>2</sub>Na<sup>+</sup> [M+Na]<sup>+</sup>: 451.2104, found: 451.2104.

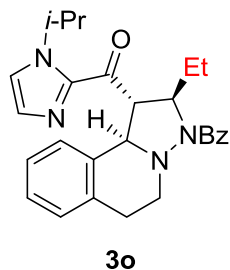

A dried 25 mL Schlenk tube was charged with  $\alpha,\beta$ -unsaturated 2-acylimidazole **1o** (9.6 mg, 0.05 mmol), C,N-cyclic azomethine imine **2a** (15.0 mg, 0.06 mmol) and chiral catalyst  **$\Delta$ -Rh2** (1.03 mg, 2.0 mol%). The tube was purged with argon and anhydrous DCE (0.1 mL) was added. The reaction mixture was stirred at room temperature for 5 h (monitored by TLC) under argon. The mixture was purified by flash column chromatography on silica gel (petroleum ether/ EtOAc = 5:1 to 1:1) to afford chiral product **3o** as colorless oil (19.8 mg, yield: 90%). Enantiomeric excess was determined by HPLC analysis, ee = 99% (Chiralpak column IC,  $\lambda$  = 254 nm, *n*-hexane/*i*-PrOH = 80:20, flow rate: 1.0 mL/min, 30 °C, tr(major) = 12.521 min, tr(minor) = 13.649 min).  $[\alpha]_D^{25}$  (*c* 0.5, CHCl<sub>3</sub>) = -50.371.

<sup>1</sup>H NMR (400 MHz, CDCl<sub>3</sub>)  $\delta$  7.79 (d, *J* = 6.6 Hz, 2H), 7.43-7.30 (m, 4H), 7.13-7.03 (m, 3H), 6.87 (m, 1H), 6.57 (d, *J* = 7.7 Hz, 1H), 5.68 (hept, 1H), 4.97 (dd, *J* = 8.0, 10.2 Hz, 1H), 4.75 (d, *J* = 10.2 Hz, 1H), 4.70 (dt, *J* = 5.6, 8.2 Hz, 1H), 3.34 (m, 1H), 3.22 (m, 1H), 2.95 (ddd, *J* = 5.1, 12.3, 16.1 Hz, 1H), 2.71 (d, *J* = 16.1 Hz, 1H), 2.22 (m, 1H), 1.91 (m, 1H), 1.54 (d, *J* = 6.7 Hz, 3H), 1.51 (d, *J* = 6.7 Hz, 3H), 0.93 (t, *J* = 7.4 Hz, 3H).

<sup>13</sup>C NMR (100 MHz, CDCl<sub>3</sub>)  $\delta$  191.4, 170.5, 142.9, 136.1, 133.8, 133.0, 130.3, 129.9, 128.5, 128.2 (2C), 127.5 (2C), 127.1, 126.3, 125.8, 122.3, 67.6, 67.5, 59.5, 49.9, 49.6, 30.9, 30.3, 29.6, 23.7, 11.3.

IR (KBr):  $\nu$  (cm<sup>-1</sup>) 2963, 1678, 1550, 1396, 1092, 850, 730.

HRMS (ESI, *m/z*) calcd for C<sub>27</sub>H<sub>30</sub>N<sub>4</sub>O<sub>2</sub>Na<sup>+</sup> [M+Na]<sup>+</sup>: 465.2261, found: 465.2260.

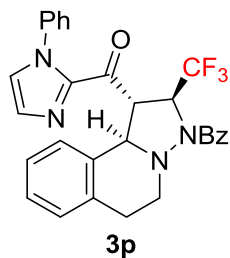

A dried 25 mL Schlenk tube was charged with  $\alpha,\beta$ -unsaturated 2-acylimidazole **1p** (13.3 mg, 0.05 mmol), C,N-cyclic azomethine imine **2a** (15 mg, 0.06 mmol) and chiral catalyst  $\Delta$ -**Rh2** (1.03 mg, 2.0 mol%). The tube was purged with argon and anhydrous DCE (0.1 mL) was added. The reaction mixture was stirred at room temperature for 5 h (monitored by TLC) under argon. The mixture was purified by flash column chromatography on silica gel (petroleum ether/ EtOAc = 5:1 to 1:1) to afford chiral product **3p** as white solid (25.4 mg, yield: 99%). Enantiomeric excess was determined by HPLC analysis, ee = 97% (Chiralpak column IC,  $\lambda$  = 254 nm, *n*-hexane/*i*-PrOH = 80:20, flow rate: 1.0 mL/min, 30 °C, tr(major) = 8.206 min, tr(minor) = 9.840 min).  $[\alpha]_D^{25}$  (c 0.5, CHCl<sub>3</sub>) = -203.00. Mp 165–167 °C.

<sup>1</sup>H NMR (400 MHz, CDCl<sub>3</sub>)  $\delta$  7.70 (m, 2H), 7.54 (m, 3H), 7.46-7.32 (m, 5H), 7.26 (d, *J* = 0.8 Hz, 1H), 7.21 (d, *J* = 0.8 Hz, 1H), 7.10 (m, 2H), 6.90 (m, 1H), 6.47 (d, *J* = 7.8 Hz, 1H), 5.56 (qn, 1H), 5.38 (dd, *J* = 10.2, 8.7 Hz, 1H), 4.46 (d, *J* = 10.2 Hz, 1H), 3.48-3.35 (m, 2H), 2.98 (ddd, *J* = 7.5, 10.6, 16.2 Hz, 1H), 2.81 (dt, *J* = 16.2, 2.5 Hz, 1H).

<sup>13</sup>C NMR (100 MHz, CDCl<sub>3</sub>)  $\delta$  187.3, 173.9, 143.0, 138.0, 134.7, 133.2, 131.9, 130.87, 130.85, 129.3 (2C), 128.8, 128.6, 128.3 (2C), 127.7 (2C), 127.6, 126.3, 126.0 (2C), 125.8, 124.7 (q, *J* = 278 Hz), 68.6, 64.7 (q, *J* = 33.5 Hz), 53.8, 48.9, 29.5.

IR (KBr):  $\nu$  (cm<sup>-1</sup>) 2958, 1680, 1597, 1491, 1446, 1411, 1391, 1328, 1283, 1257, 1170, 1126, 976, 802, 739, 692.

HRMS (ESI, *m/z*) calcd for C<sub>29</sub>H<sub>23</sub>F<sub>3</sub>N<sub>4</sub>O<sub>2</sub>Na<sup>+</sup> [M+Na]<sup>+</sup>: 539.1665, found: 539.1664.

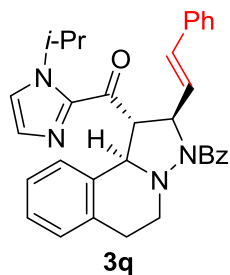

A dried 25 mL Schlenk tube was charged with styryl-substituted  $\alpha,\beta$ -unsaturated 2-acyl imidazole **1q** (13.3 mg, 0.05 mmol), C,N-cyclic azomethine imine **2a** (15.0 mg, 0.06 mmol) and chiral catalyst **A-Rh2** (1.03 mg, 2.0 mol%). The tube was purged with argon and anhydrous DCE (0.1 mL) was added. The reaction mixture was stirred at room temperature for 4 h (monitored by TLC) under argon. The mixture was purified by flash column chromatography on silica gel (petroleum ether/ EtOAc = 5:1 to 1:1) to afford chiral product **3q** as yellow oil (25.0 mg, yield: 97%). Enantiomeric excess was determined by HPLC analysis, ee = 98% (Chiralpak column IC,  $\lambda$  = 254 nm, *n*-hexane/*i*-PrOH = 80:20, flow rate: 1.0 mL/min, 30 °C, tr(major) = 14.530 min, tr(minor) = 15.653 min).  $[\alpha]_D^{25}$  (*c* 0.5, CHCl<sub>3</sub>) = +26.225.

<sup>1</sup>H NMR (400 MHz, CDCl<sub>3</sub>)  $\delta$  7.86 (d, *J* = 7.0 Hz, 2H), 7.45-7.04 (m, 12H), 6.92 (m, 1H), 6.80-6.50 (m, 3H), 5.67 (hept, 1H), 5.42 (t, *J* = 6.0 Hz, 1H), 5.16 (dd, *J* = 10.1, 8.0 Hz, 1H), 4.90 (d, *J* = 10.1 Hz, 1H), 3.42-3.24 (m, 2H), 3.02 (ddd, *J* = 5.4, 12.2, 16.2 Hz, 1H), 2.74 (d, *J* = 16.2 Hz, 1H), 1.53 (d, *J* = 6.7 Hz, 3H), 1.50 (d, *J* = 6.7 Hz, 3H).

<sup>13</sup>C NMR (100 MHz, CDCl<sub>3</sub>)  $\delta$  190.5, 169.9, 142.9, 136.8, 135.5, 133.8, 132.9, 131.4, 130.5, 130.2, 129.5, 128.6, 128.5 (2C), 128.4 (2C), 127.6 (2C), 127.55, 127.2, 126.7 (2C), 126.3, 126.0, 122.5, 66.5, 66.2, 59.4, 50.2, 49.6, 29.5, 23.8, 23.6.

IR (KBr):  $\nu$  (cm<sup>-1</sup>) 2975, 1751, 1505, 1436, 1259, 749.

HRMS (ESI, *m/z*) calcd for C<sub>33</sub>H<sub>32</sub>N<sub>4</sub>O<sub>2</sub>Na<sup>+</sup> [M+Na]<sup>+</sup>: 539.2417, found: 539.2416.



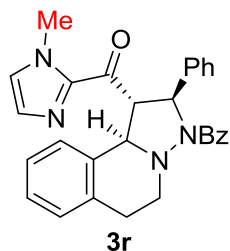

A dried 25 mL Schlenk tube was charged with  $\alpha,\beta$ -unsaturated 2-acylimidazole **1r** (10.6 mg, 0.05 mmol), C,N-cyclic azomethine imine **2a** (15 mg, 0.06 mmol) and chiral catalyst  **$\Delta$ -Rh2** (1.03 mg, 2.0 mol%). The tube was purged with argon and anhydrous DCE (0.1 mL) was added. The reaction mixture was stirred at room temperature for 3 h (monitored by TLC) under argon. The mixture was purified by flash column chromatography on silica gel (petroleum ether/ EtOAc = 5:1 to 1:1) to afford chiral product **3r** as white solid (22.8 mg, yield: 99%). Enantiomeric excess was determined by HPLC analysis, ee = 97% (Chiralpak column IC,  $\lambda$  = 254 nm, *n*-hexane/*i*-PrOH = 70:30, flow rate: 1.0 mL/min, 30 °C, tr(major) = 14.863 min, tr(minor) = 27.742 min).  $[\alpha]_D^{25}$  (*c* 0.5, CHCl<sub>3</sub>) = -8.074. Mp 235–238 °C.

<sup>1</sup>H NMR (400 MHz, CDCl<sub>3</sub>)  $\delta$  7.89 (d, *J* = 7.1 Hz, 2H), 7.45-7.35 (m, 5H), 7.30-7.15 (m, 3H), 7.13-7.00 (m, 4H), 6.86 (m, 1H), 6.51 (d, *J* = 7.7 Hz, 1H), 6.08 (d, *J* = 7.9 Hz, 1H), 5.27 (dd, *J* = 10.0, 7.9 Hz, 1H), 4.84 (d, *J* = 10.0 Hz, 1H), 4.15 (s, 3H), 3.31 (m, 1H), 3.20 (ddd, *J* = 3.2, 10.6, 12.2 Hz, 1H), 3.02 (ddd, *J* = 5.2, 12.2, 16.0 Hz, 1H), 2.71 (d, *J* = 16.0 Hz, 1H).

<sup>13</sup>C NMR (100 MHz, CDCl<sub>3</sub>)  $\delta$  191.0, 170.9, 143.5, 141.2, 135.6, 133.2, 132.9, 130.3, 130.1, 128.6, 128.5 (2C), 128.4 (2C), 128.2, 127.6 (2C), 127.2, 127.1, 126.3, 126.1 (2C), 125.8, 68.8, 68.0, 60.7, 49.9, 36.6, 29.4.

IR (KBr):  $\nu$  (cm<sup>-1</sup>) 2923, 1662, 1404, 991, 669.

HRMS (ESI, *m/z*) calcd for C<sub>29</sub>H<sub>26</sub>N<sub>4</sub>O<sub>2</sub>Na<sup>+</sup> [M+Na]<sup>+</sup>: 485.1948, found: 485.1948.

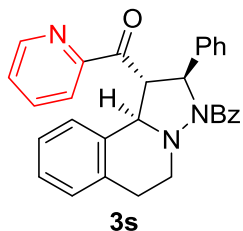

A dried 25 mL Schlenk tube was charged with  $\alpha,\beta$ -unsaturated 2-acylpyridine **1s** (10.4 mg, 0.05 mmol), C,N-cyclic azomethine imine **2a** (15.0 mg, 0.06 mmol) and chiral catalyst  **$\Delta$ -Rh2** (1.03 mg, 2.0 mol%). The tube was purged with argon and anhydrous DCE (0.1 mL) was added. The reaction mixture was stirred at room temperature for 5 h (monitored by TLC) under argon. The mixture was purified by flash column chromatography on silica gel (petroleum ether/ EtOAc = 5:1 to 1:1) to afford chiral product **3s** as white solid (21.6 mg, yield: 95%). Enantiomeric excess was determined by HPLC analysis, ee = 94% (Chiralpak column IC,  $\lambda$  = 254 nm, *n*-hexane/*i*-PrOH = 80:20, flow rate: 1.0 mL/min, 30 °C, tr(major) = 26.625 min, tr(minor) = 48.838 min).  $[\alpha]_D^{25}$  (*c* 0.5, CHCl<sub>3</sub>) = -13.192. Mp 210–213 °C.

<sup>1</sup>H NMR (400 MHz, CDCl<sub>3</sub>)  $\delta$  8.41 (d, *J* = 4.2 Hz, 1H), 8.22 (d, *J* = 7.8 Hz, 1H), 8.00-7.80 (m, 3H), 7.50-7.12 (m, 9H), 7.04 (m, 2H), 6.76 (m, 1H), 6.50 (d, *J* = 7.8 Hz, 1H), 6.11 (d, *J* = 8.1 Hz, 1H), 5.53 (dd, *J* = 10.1, 8.1 Hz, 1H), 4.94 (d, *J* = 10.1 Hz, 1H), 3.40-3.23 (m, 2H), 3.04 (ddd, *J* = 5.5, 12.3, 16.0 Hz, 1H), 2.74 (d, *J* = 16.0 Hz, 1H).

<sup>13</sup>C NMR (101 MHz, CDCl<sub>3</sub>)  $\delta$  200.9, 170.6, 152.9, 149.0, 141.3, 137.1, 135.6, 133.3, 132.9, 130.3, 128.5 (2C), 128.48, 128.4 (2C), 127.7 (2C), 127.6, 127.2, 127.0, 126.5, 126.0 (2C), 125.8, 122.9, 68.9, 68.4, 58.8, 50.0, 29.5.

IR (KBr):  $\nu$  (cm<sup>-1</sup>) 3057, 3027, 2930, 1687, 1648, 1601, 1579, 1494, 1446, 1381, 1348, 1279, 1250, 995, 937, 868, 769, 748, 695, 669, 618, 550.

HRMS (ESI, *m/z*) calcd for C<sub>30</sub>H<sub>25</sub>N<sub>3</sub>O<sub>2</sub>Na<sup>+</sup> [M+Na]<sup>+</sup>: 482.1839, found: 482.1836.

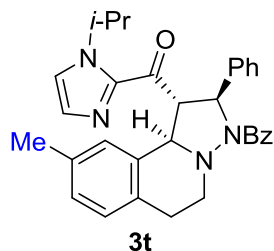

A dried 25 mL Schlenk tube was charged with  $\alpha,\beta$ -unsaturated 2-acylimidazole **1a** (12.0 mg, 0.05 mmol), C,N-cyclic azomethine imine **2t** (15.8 mg, 0.06 mmol) and chiral catalyst  **$\Delta$ -Rh2** (1.03 mg, 2.0 mol%). The tube was purged with argon and anhydrous DCE (0.1 mL) was added. The reaction mixture was stirred at room temperature for 4 h (monitored by TLC) under argon. The mixture was purified by flash column chromatography on silica gel (petroleum ether/ EtOAc = 5:1 to 1:1) to afford chiral product **3t** as white solid (24.4 mg, yield: 97%). Enantiomeric excess was determined by HPLC analysis, ee = 91% (Chiralpak column IC,  $\lambda$  = 254 nm, *n*-hexane/*i*-PrOH = 80:20, flow rate: 1.0 mL/min, 30 °C, tr(major) = 18.996 min, tr(minor) = 29.639 min).  $[\alpha]_D^{25}$  (*c* 0.5, CHCl<sub>3</sub>) = -13.352. Mp 160–162 °C.

<sup>1</sup>H NMR (400 MHz, CDCl<sub>3</sub>)  $\delta$  7.88 (d, *J* = 7.1 Hz, 2H), 7.45–7.15 (m, 9H), 7.04 (s, 1H), 6.88 (m, 2H), 6.24 (s, 1H), 6.10 (d, *J* = 8.0 Hz, 1H), 5.77 (hept, 1H), 5.31 (dd, *J* = 10.0, 8.0 Hz, 1H), 4.72 (d, *J* = 10.0 Hz, 1H), 3.29 (m, 1H), 3.18 (m, 1H), 2.96 (ddd, *J* = 5.1, 12.0, 16.0 Hz, 1H), 2.66 (d, *J* = 16.0 Hz, 1H), 1.96 (s, 3H), 1.57 (d, *J* = 6.5 Hz, 3H), 1.55 (d, *J* = 6.5 Hz, 3H).

<sup>13</sup>C NMR (100 MHz, CDCl<sub>3</sub>)  $\delta$  191.0, 170.8, 142.9, 141.3, 135.6, 135.0, 132.9, 130.6, 130.2, 129.7, 128.5 (2C), 128.4 (2C), 128.3, 128.0, 127.6 (2C), 127.1, 127.0, 126.1 (2C), 122.3, 69.2, 67.8, 61.3, 50.1, 49.6, 29.0, 24.0, 23.6, 20.8.

IR (KBr):  $\nu$  (cm<sup>-1</sup>) 2951, 1751, 1664, 1563, 1395, 1215, 988, 758.

HRMS (ESI, *m/z*) calcd for C<sub>32</sub>H<sub>32</sub>N<sub>4</sub>O<sub>2</sub>Na<sup>+</sup> [M+Na]<sup>+</sup>: 527.2417, found: 527.2417.

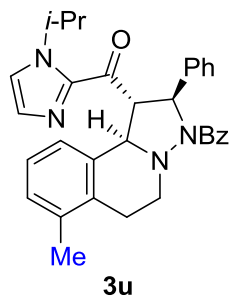

A dried 25 mL Schlenk tube was charged with  $\alpha,\beta$ -unsaturated 2-acylimidazole **1a** (12.0 mg, 0.05 mmol), C,N-cyclic azomethine imine **2u** (15.8 mg, 0.06 mmol) and chiral catalyst  **$\Delta$ -Rh2** (1.03 mg, 2.0 mol%). The tube was purged with argon and anhydrous DCE (0.1 mL) was added. The reaction mixture was stirred at room temperature for 5 h (monitored by TLC) under argon. The mixture was purified by flash column chromatography on silica gel (petroleum ether/ EtOAc = 5:1 to 1:1) to afford chiral product **3u** as white solid (24.1 mg, yield: 96%). Enantiomeric excess was determined by HPLC analysis, ee = 99% (Chiralpak column IC,  $\lambda$  = 254 nm, *n*-hexane/*i*-PrOH = 80:20, flow rate: 1.0 mL/min, 30 °C, tr(major) = 19.252 min, tr(minor) = 28.024 min).  $[\alpha]_D^{25}$  (c 0.5, CHCl<sub>3</sub>) = -21.504. Mp 160–163 °C.

<sup>1</sup>H NMR (400 MHz, CDCl<sub>3</sub>)  $\delta$  7.89 (d, *J* = 7.0 Hz, 2H), 7.45-7.15 (m, 9H), 7.04 (s, 1H), 6.91 (d, *J* = 7.5 Hz, 1H), 6.76 (t, *J* = 7.5 Hz, 1H), 6.36 (d, *J* = 7.7 Hz, 1H), 6.10 (d, *J* = 8.0 Hz, 1H), 5.72 (hept, 1H), 5.37 (dd, *J* = 10.0, 8.0 Hz, 1H), 4.79 (d, *J* = 10.0 Hz, 1H), 3.35 (m, 1H), 3.18 (m, 1H), 2.84-2.64 (m, 2H), 2.14 (s, 3H), 1.53 (t, *J* = 6.8 Hz, 6H).

<sup>13</sup>C NMR (100 MHz, CDCl<sub>3</sub>)  $\delta$  191.0, 170.8, 142.8, 141.3, 136.0, 135.6, 132.9, 131.4, 130.4, 130.1, 128.5, 128.4 (2C), 128.3 (2C), 127.5 (2C), 126.9, 126.0 (2C), 125.5, 124.0, 122.4, 69.2, 67.8, 61.0, 49.7, 49.5, 26.9, 23.7, 23.6, 19.3.

IR (KBr):  $\nu$  (cm<sup>-1</sup>) 2929, 1663, 1576, 1495, 1448, 1396, 1351, 1255, 1163, 1076, 990, 917, 779, 696, 670, 552.

HRMS (ESI, *m/z*) calcd for C<sub>32</sub>H<sub>32</sub>N<sub>4</sub>O<sub>2</sub>Na<sup>+</sup> [M+Na]<sup>+</sup>: 527.2417, found: 527.2417.

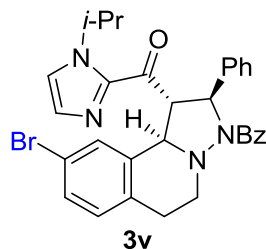

A dried 25 mL Schlenk tube was charged with  $\alpha,\beta$ -unsaturated 2-acylimidazole **1a** (12.0 mg, 0.05 mmol), C,N-cyclic azomethine imine **2v** (19.75 mg, 0.06 mmol) and chiral catalyst  **$\Delta$ -Rh2** (1.03 mg, 2.0 mol%). The tube was purged with argon and anhydrous DCE (0.1 mL) was added. The reaction mixture was stirred at room temperature for 5 h (monitored by TLC) under argon. The mixture was purified by flash column chromatography on silica gel (petroleum ether/ EtOAc = 5:1 to 1:1) to afford chiral product **3v** as white solid (26.6 mg, yield: 94%). Enantiomeric excess was determined by HPLC analysis, ee = 91% (Chiralpak column IC,  $\lambda$  = 254 nm, *n*-hexane/*i*-PrOH = 80:20, flow rate: 1.0 mL/min, 30 °C, tr(major) = 17.280 min, tr(minor) = 24.890 min).  $[\alpha]_D^{25}$  (c 0.5, CHCl<sub>3</sub>) = -18.229. Mp 130–133 °C.

<sup>1</sup>H NMR (400 MHz, CDCl<sub>3</sub>)  $\delta$  7.85 (d, *J* = 7.1 Hz, 2H), 7.46-7.13 (m, 10H), 7.06 (s, 1H), 6.91 (d, *J* = 8.2 Hz, 1H), 6.55 (d, *J* = 1.8 Hz, 1H), 6.12 (d, *J* = 8.1 Hz, 1H), 5.74 (hept, 1H), 5.33 (dd, *J* = 10.1, 8.1 Hz, 1H), 4.66 (d, *J* = 10.1 Hz, 1H), 3.33 (m, 1H), 3.20 (m, 1H), 2.94 (ddd, *J* = 5.2, 12.2, 16.2 Hz, 1H), 2.68 (d, *J* = 16.2 Hz, 1H), 1.59 (d, *J* = 6.7 Hz, 3H), 1.56 (d, *J* = 6.7 Hz, 3H).

<sup>13</sup>C NMR (100 MHz, CDCl<sub>3</sub>)  $\delta$  190.2, 170.9, 142.8, 141.1, 135.5, 135.2, 131.9, 130.8, 130.3, 130.2, 130.1, 129.6, 128.5 (2C), 128.4 (2C), 127.7 (2C), 127.1, 126.0 (2C), 122.8, 119.1, 68.5, 67.5, 61.1, 49.7, 49.6, 29.0, 23.9, 23.7.

IR (KBr):  $\nu$  (cm<sup>-1</sup>) 2929, 1664, 1576, 1486, 1449, 1396, 1351, 1255, 1192, 1165, 1078, 990, 935, 844, 760, 698, 669, 517.

HRMS (ESI, *m/z*) calcd for C<sub>31</sub>H<sub>29</sub>BrN<sub>4</sub>O<sub>2</sub>Na<sup>+</sup> [M+Na]<sup>+</sup>: 591.1366, found: 591.1365.

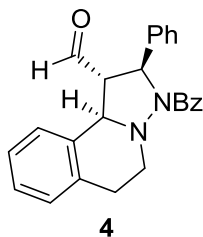

In a round bottom flask, sodium borohydride (6.15 mg, 0.16 mmol) was added portionwise to a solution of the substrate **3a** (32.2mg, 0.06 mmol in methanol,  $c = 0.125$  M). The reaction was stirred at room temperature for 2 h and monitored by TLC. After completion, water was added and the mixture was extracted with ethyl acetate. The organic layer was further washed with brine, dried over magnesium sulfate and concentrated under vacuum. The intermediate so obtained was dissolved with ethyl acetate ( $c = 0.05$  M) and treated with methyl iodide (28  $\mu$ L, 0.45 mmol). The mixture was heated at 60  $^{\circ}$ C for 16 h, cooled down to room temperature and concentrated to dryness. The crude residue was taken up in toluene ( $c = 0.17$  M), glycine (19.51 mg, 0.26 mmol) and 2 M NaOH solution (0.29 mL, 0.58 mmol) were added. The mixture was heated at 80  $^{\circ}$ C for 5 h. At 80  $^{\circ}$ C, 1 M HCl solution (0.6 mL, 0.58 mmol) was added and the mixture was stirred until lightening of the aqueous phase (from cloudy to clear). Then the mixture was cooled down to room temperature and ethyl acetate was added. The organic layer was washed with an aqueous solution of 1M HCl and brine, dried over magnesium sulfate and concentrated under vacuum. The residue was purified by column chromatography (petroleum ether/ EtOAc = 7:1 to 3:1) to afford the chiral product **4** as white solid (15.5 mg, yield: 62%). Enantiomeric excess was determined by HPLC analysis, ee = 97% (Chiralpak column IC,  $\lambda = 254$  nm,  $n$ -hexane/ $i$ -PrOH = 70:30, flow rate: 1.0 mL/min, 30  $^{\circ}$ C,  $t_r$ (major) = 13.258 min,  $t_r$ (minor) = 22.896 min).  $[\alpha]_D^{25}$  ( $c$  0.5,  $\text{CHCl}_3$ ) = +44.853. Mp 155–158  $^{\circ}$ C.

$^1\text{H}$  NMR (400 MHz,  $\text{CDCl}_3$ )  $\delta$  10.16 (d,  $J = 3.3$  Hz, 1H), 7.88 (d,  $J = 7.1$  Hz, 2H), 7.48-7.07 (m, 11H), 6.96 (m, 1H), 6.11 (d,  $J = 8.1$  Hz, 1H), 4.67 (d,  $J = 10.2$  Hz, 1H), 3.73 (ddd,  $J = 10.2, 8.1, 3.3$  Hz, 1H), 3.37 (m, 1H), 3.06 (m, 2H), 2.74 (m, 1H).

$^{13}\text{C}$  NMR (100 MHz,  $\text{CDCl}_3$ )  $\delta$  199.3, 170.8, 140.6, 134.9, 133.0, 132.6, 130.7, 128.8 (2C), 128.6 (2C), 127.8 (2C), 127.7, 127.5, 126.9, 126.6, 125.5 (2C), 66.8, 64.9, 63.0, 50.1, 29.3.

IR (KBr):  $\nu$  ( $\text{cm}^{-1}$ ) 2985, 1720, 1394, 1028, 749.

HRMS (ESI,  $m/z$ ) calcd for  $C_{25}H_{22}N_2O_2Na^+$   $[M+Na]^+$ : 405.1573, found: 405.1573.

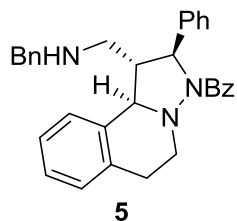

In a round bottom flask, sodium borohydride (6.9 mg, 0.18 mmol) was added portionwise to a solution of the substrate **3a** (36.0 mg, 0.07 mmol) in methanol (0.36 mL). The mixture was stirred at room temperature for 2 h and monitored by TLC. Water was added, the mixture was extracted with ethyl acetate. The organic layer was washed with brine, dried over magnesium sulfate and concentrated under vacuum. Ethyl acetate (0.56 mL) was added to the intermediate followed by methyl iodide (31.8  $\mu$ L, 0.51 mmol). The mixture was heated at 60  $^{\circ}$ C for 16 h, cooled down to room temperature and concentrated to dryness. The residue was taken up in toluene (0.36 mL), benzylamine (31.8  $\mu$ L, 0.29 mmol) and 2 M NaOH solution (0.18 mL, 0.36 mmol) were then added. The mixture was heated at 80  $^{\circ}$ C for 5 h and cooled down to room temperature. The organic layer was diluted with ethyl acetate, dried with brine and concentrated under vacuum. The residue was taken up in MeOH (0.36 mL) and sodium borohydride (27.6 mg, 0.73 mmol) was added at room temperature. The mixture was stirred at room temperature for 16 h. Water was added and the mixture was extracted with ethyl acetate. The combined organic layers were washed with brine, dried over magnesium sulfate and concentrated under vacuum. The residue was purified by column chromatography (petroleum ether/ EtOAc = 6:1 to 1:1) to afford chiral product **5** as white solid (13.5 mg, yield: 39%). Enantiomeric excess was determined by HPLC analysis, ee = 97% (Chiralpak column IA,  $\lambda$  = 254 nm, *n*-hexane/*i*-PrOH = 70:30, flow rate: 1.0 mL/min, 30  $^{\circ}$ C,  $t_r$ (minor) = 10.805 min,  $t_r$ (major) = 18.467 min).  $[\alpha]_D^{25}$  ( $c$  0.5,  $CHCl_3$ ) = -25.549. Mp 110–113  $^{\circ}$ C.

$^1H$  NMR (400 MHz,  $CDCl_3$ )  $\delta$  7.84 (d,  $J$  = 6.7 Hz, 2H), 7.45-7.20 (m, 13H), 7.15 (dt,  $J$  = 1.2, 7.3 Hz, 1H), 7.09 (t,  $J$  = 7.3 Hz, 2H), 6.98 (d,  $J$  = 7.6 Hz, 1H), 5.45 (d,  $J$  = 8.6 Hz, 1H), 4.34 (d,  $J$  = 10.6 Hz, 1H), 3.88 (AB,  $J$  = 13.2 Hz, 2H), 3.32-3.14 (m, 3H), 3.07-2.96 (m, 2H), 2.82-2.67 (m, 2H).

$^{13}\text{C}$  NMR (100 MHz,  $\text{CDCl}_3$ )  $\delta$  170.4, 142.0, 140.1, 135.5, 134.2, 133.2, 130.1, 128.6 (2C), 128.5 (2C), 128.47 (2C), 128.44 (2C), 127.6 (2C), 127.2, 127.17, 127.05, 127.03, 126.4 (2C), 126.1, 66.0, 64.1, 54.3, 53.7, 49.9, 47.4, 29.6.

IR (KBr):  $\nu$  ( $\text{cm}^{-1}$ ) 3026, 2964, 1639, 1493, 1451, 1397, 1028, 744, 697.

HRMS (ESI,  $m/z$ ) calcd for  $\text{C}_{32}\text{H}_{31}\text{N}_3\text{ONa}^+$   $[\text{M}+\text{Na}]^+$ : 496.2359, found: 496.2356.



# NMR Spectra

## Compound 3a:

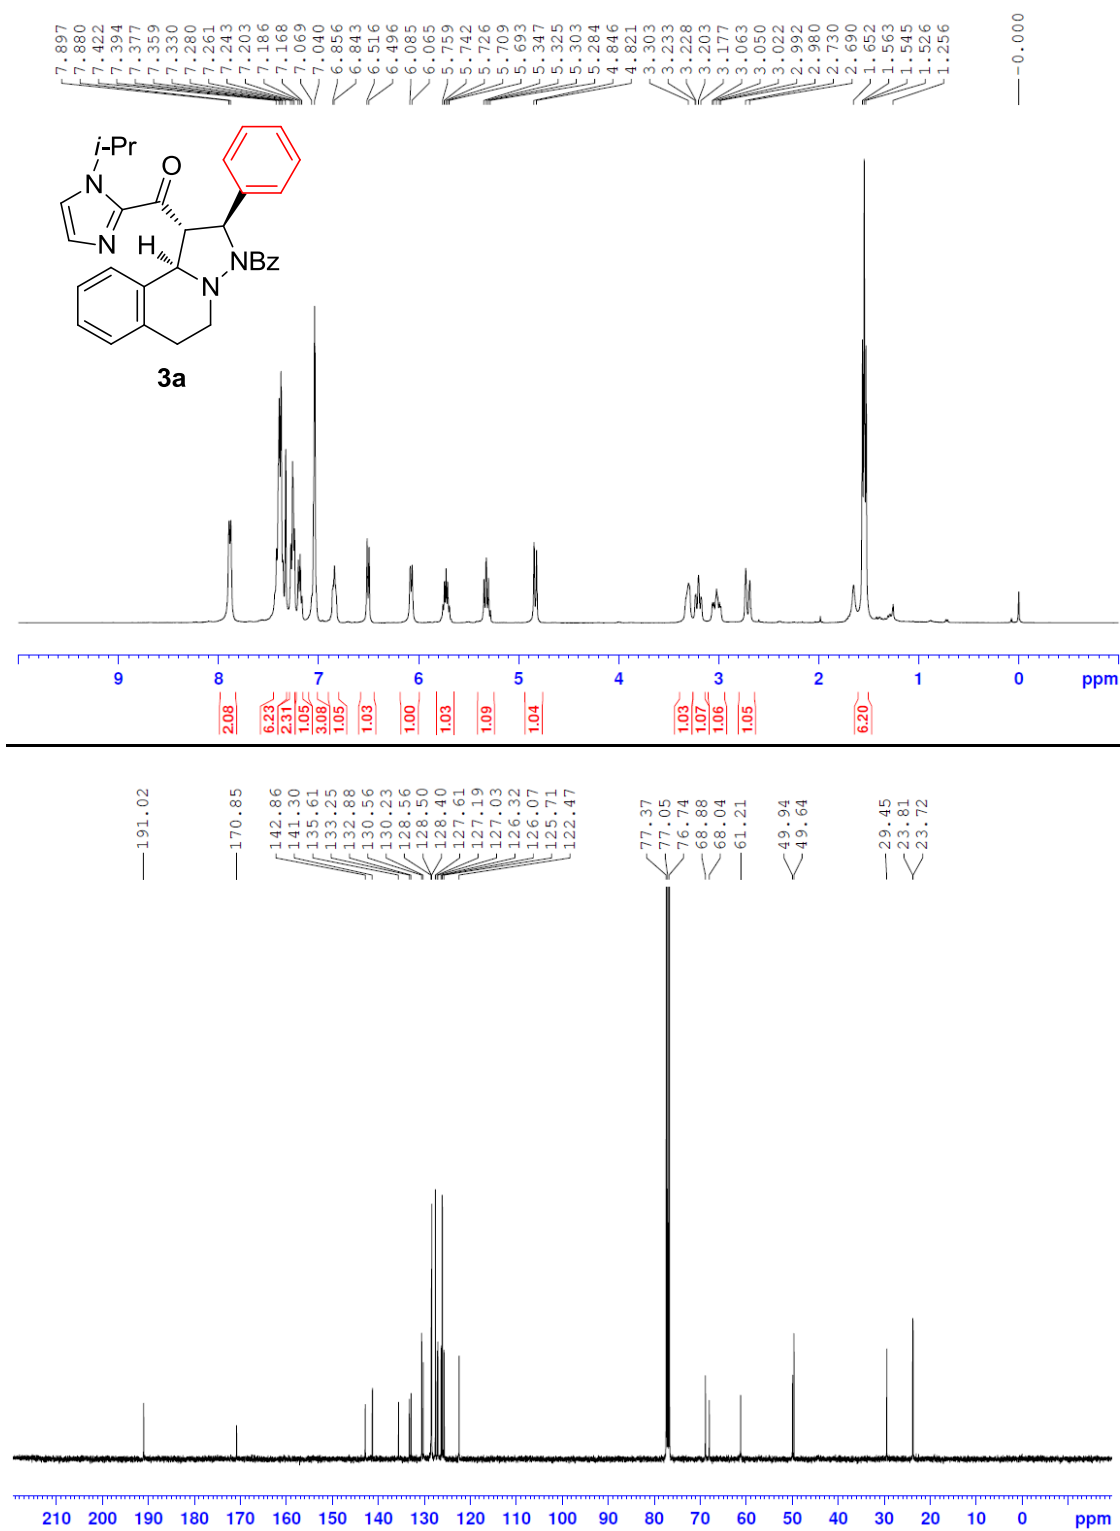

**Compound 3b:**

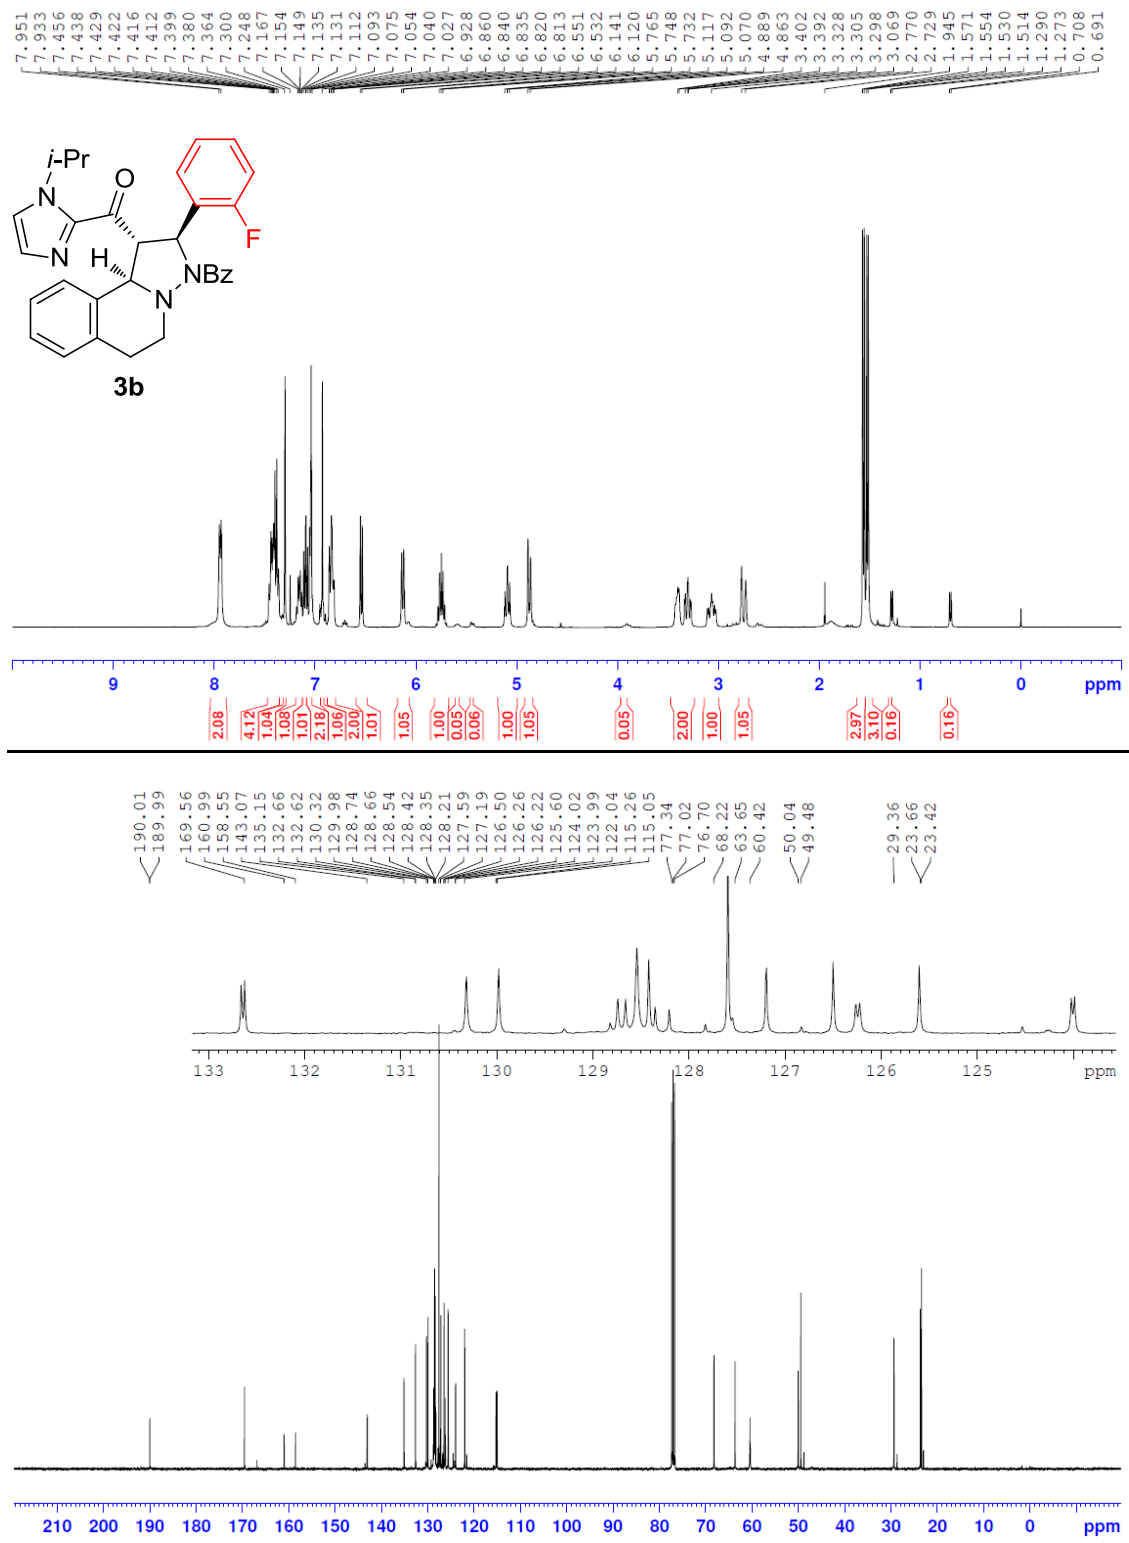

**Compound 3c:**

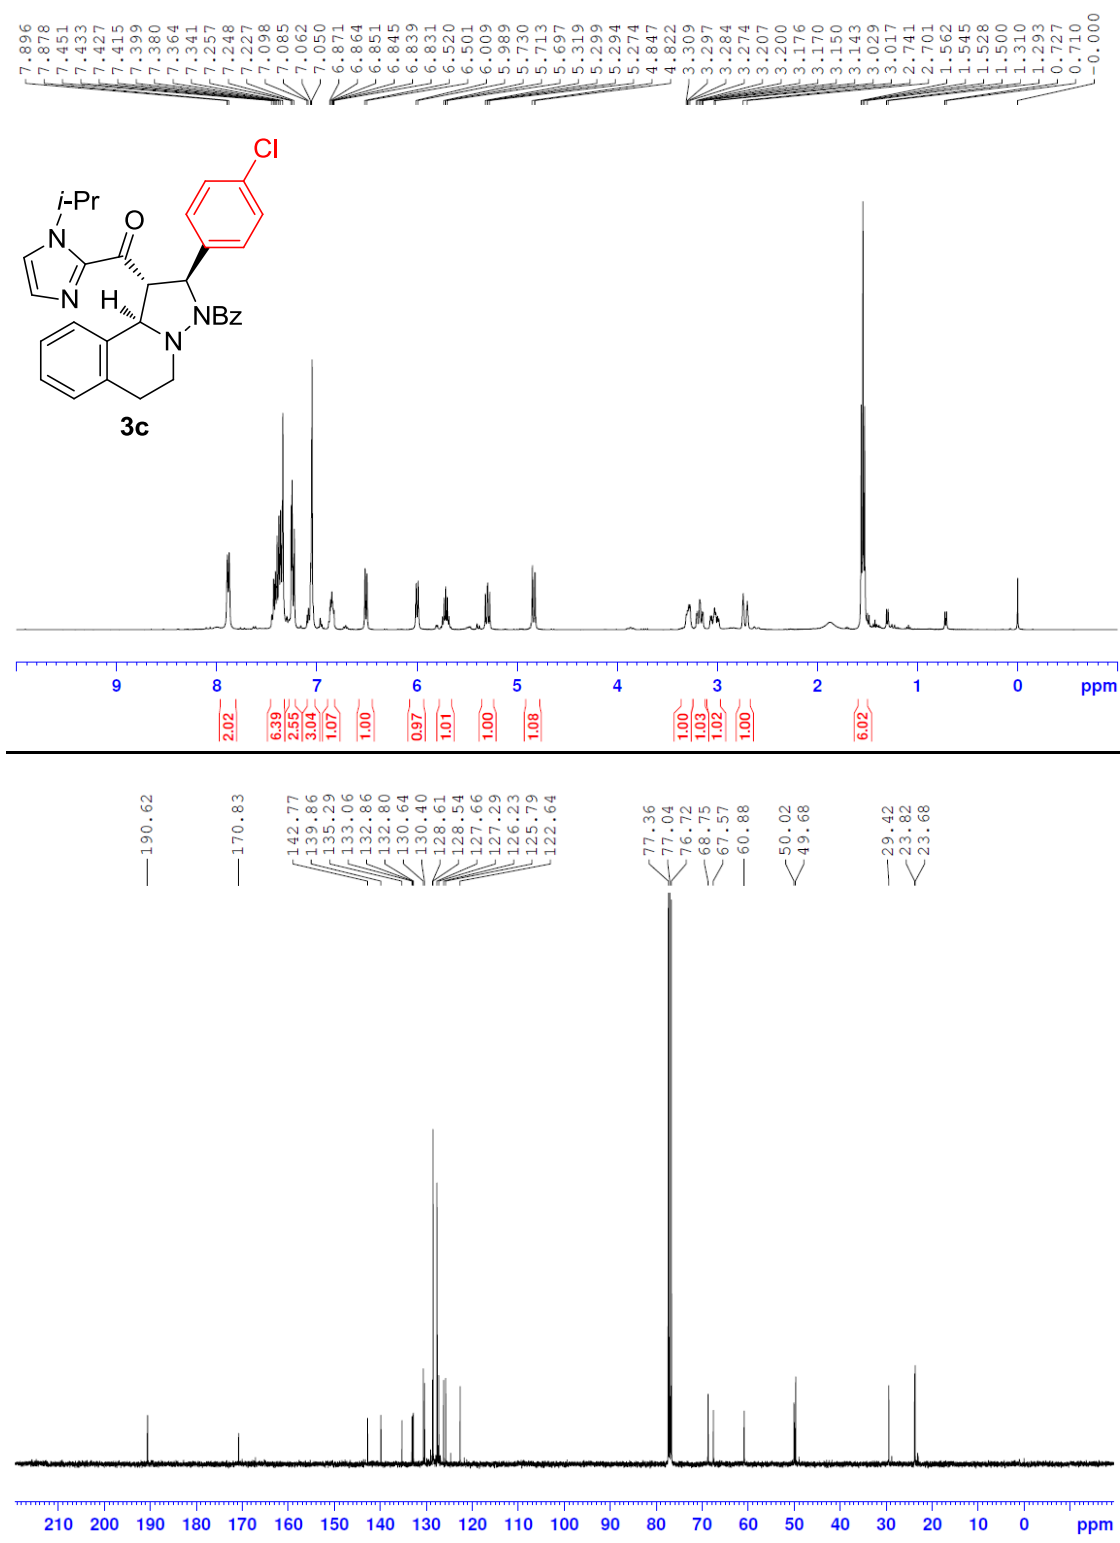

**Compound 3d:**

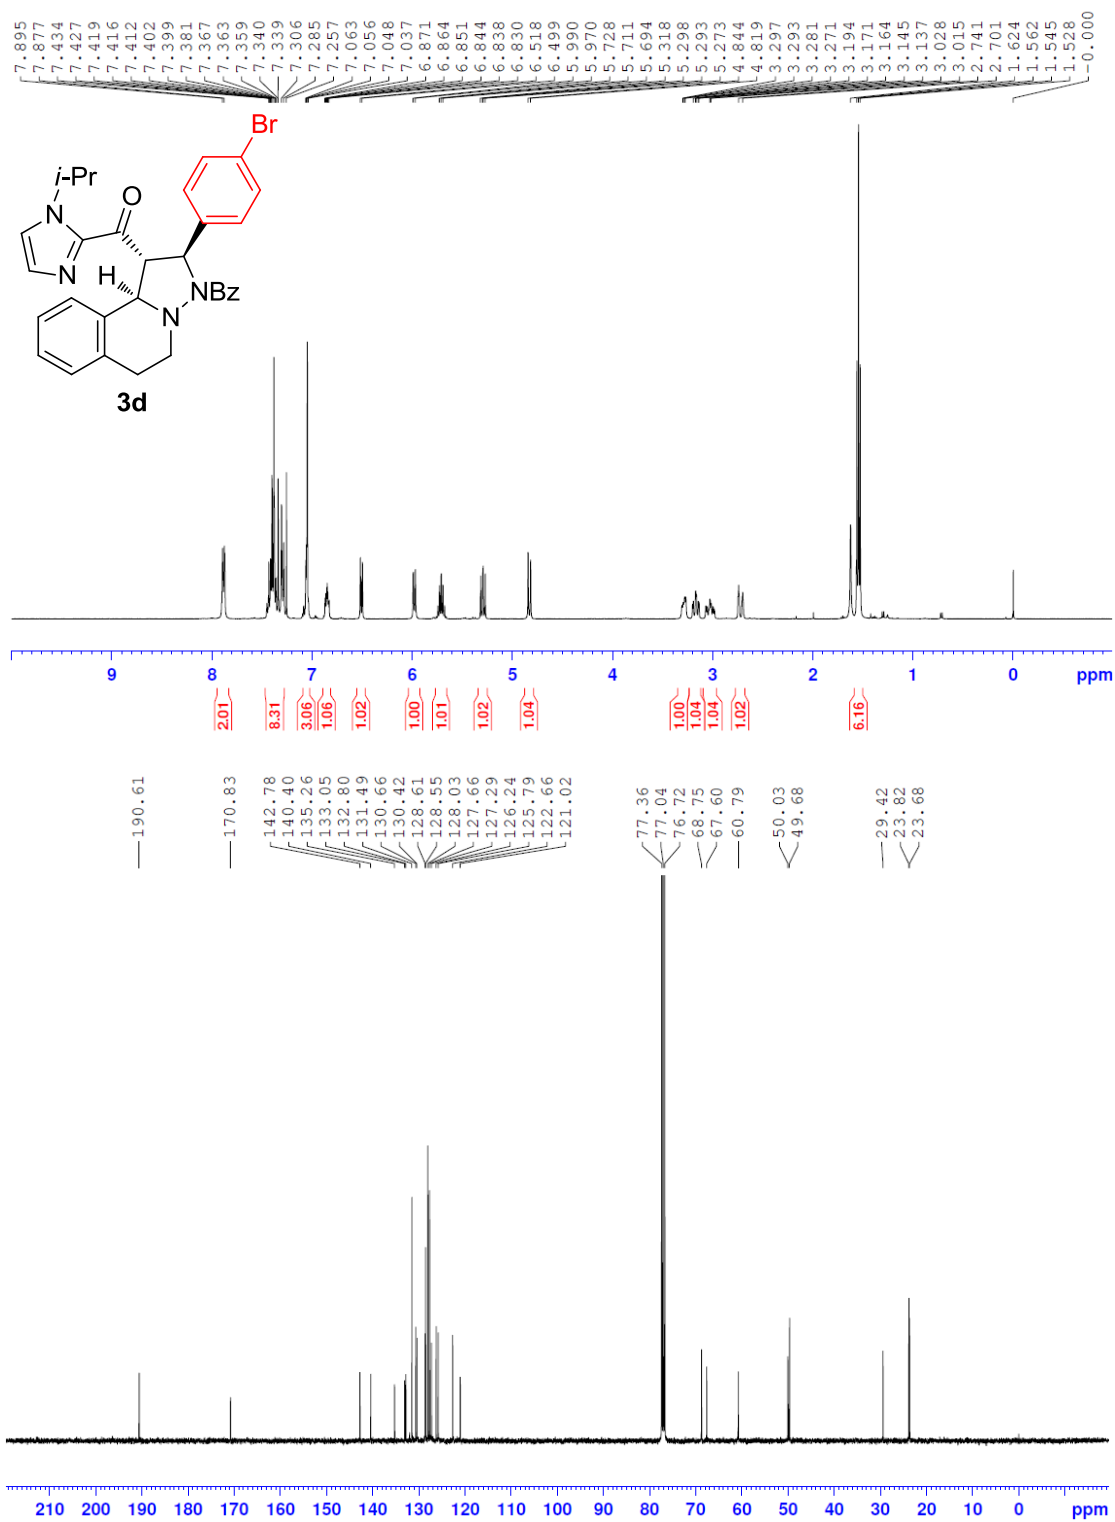

**Compound 3e:**

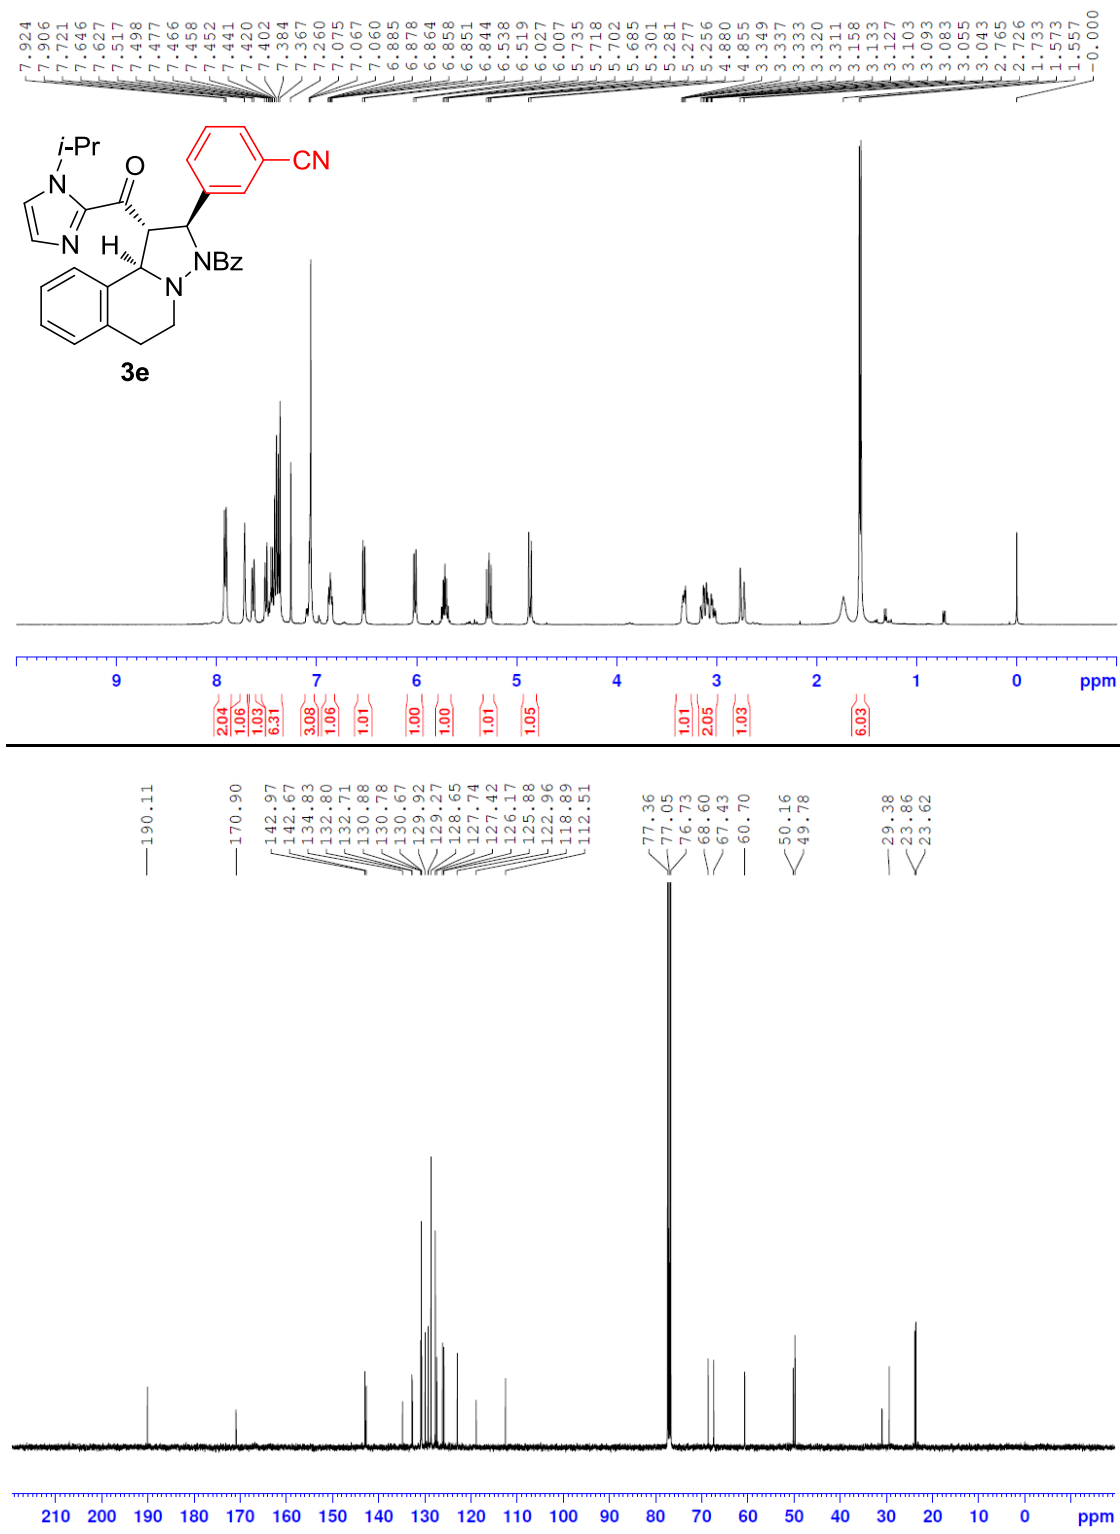

### Compound 3f:

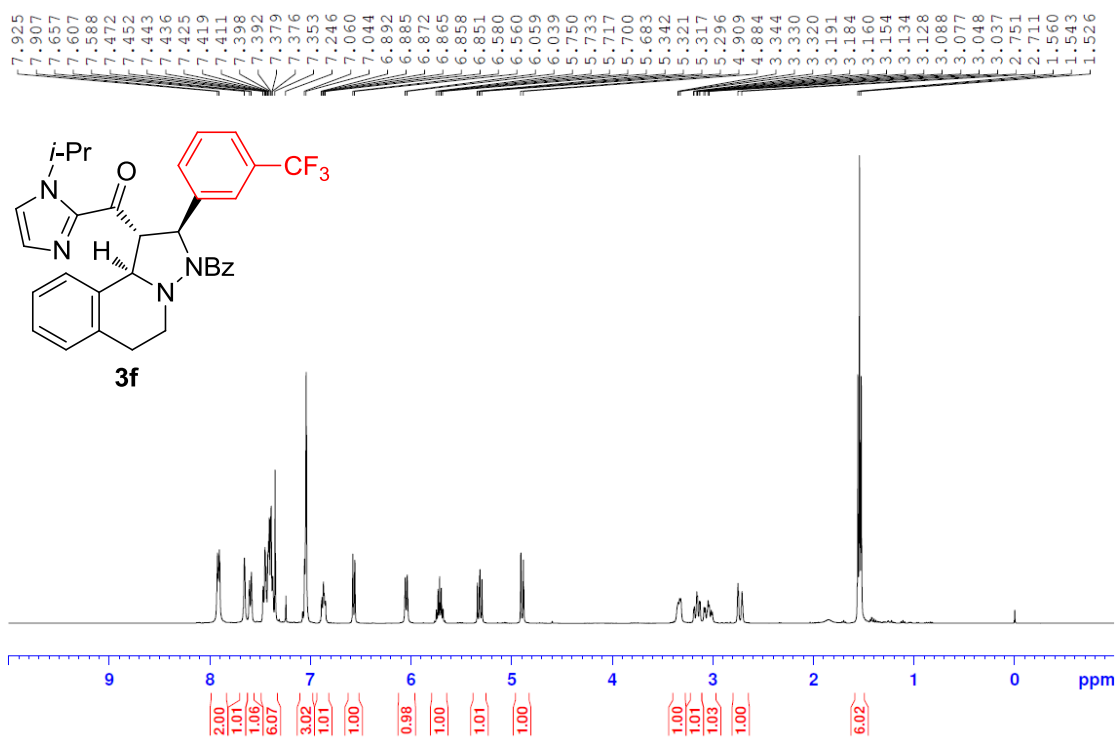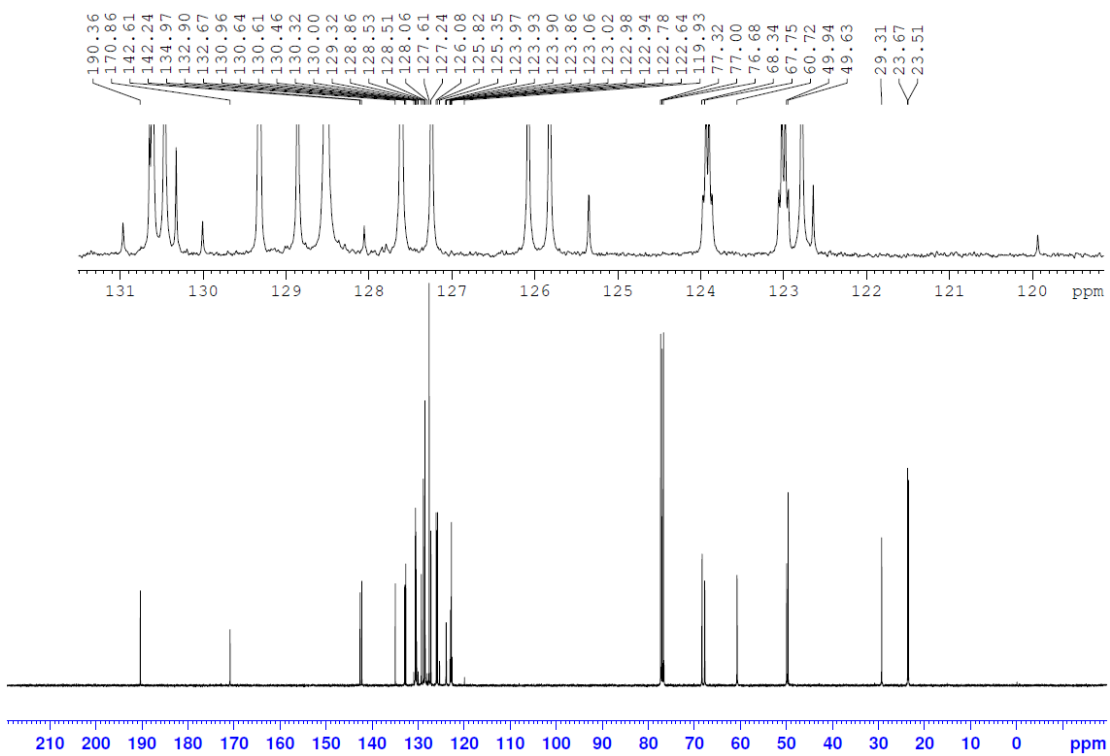

**Compound 3g:**

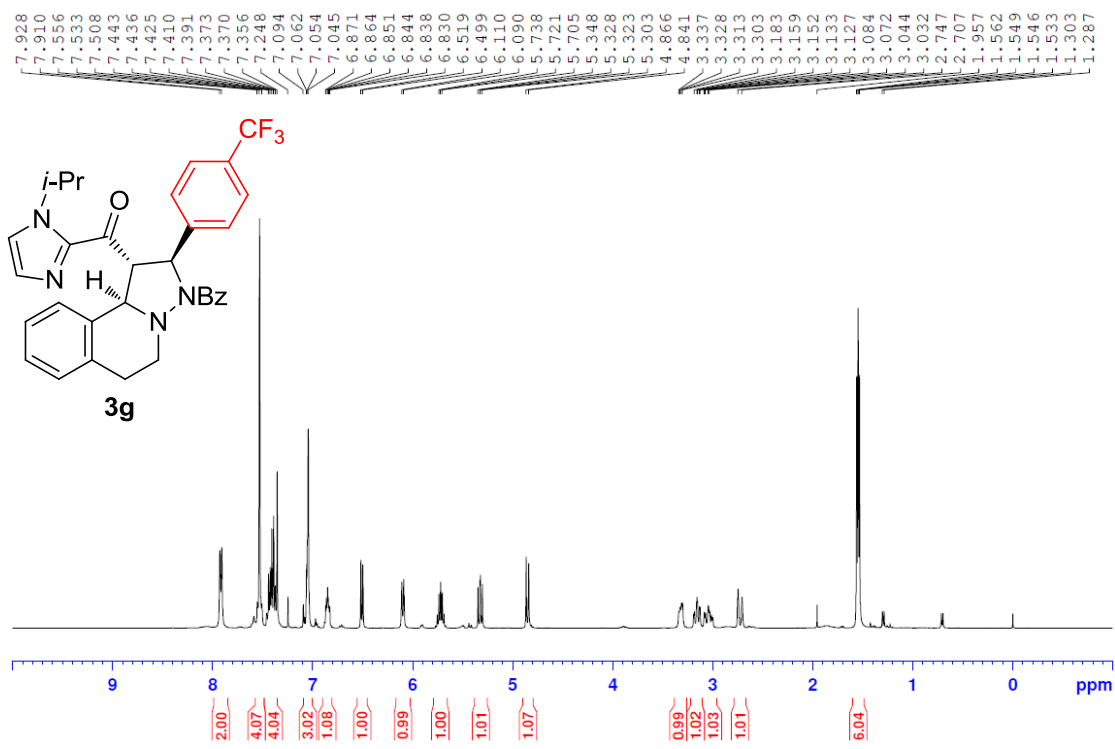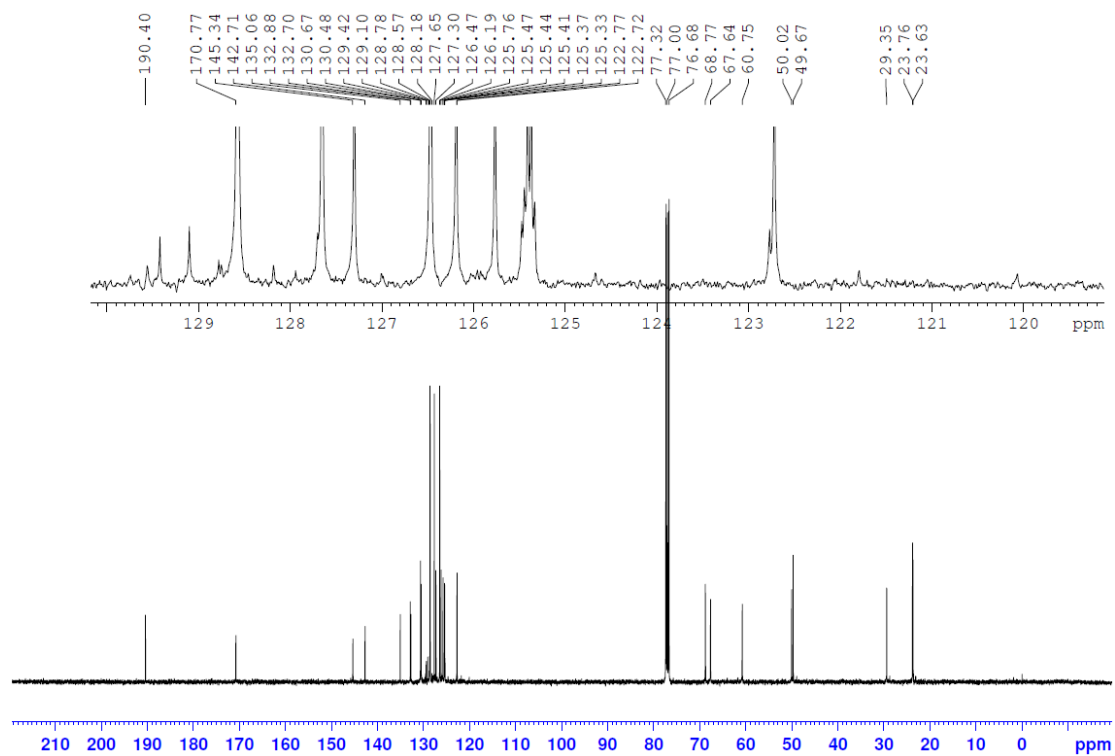

**Compound 3h:**

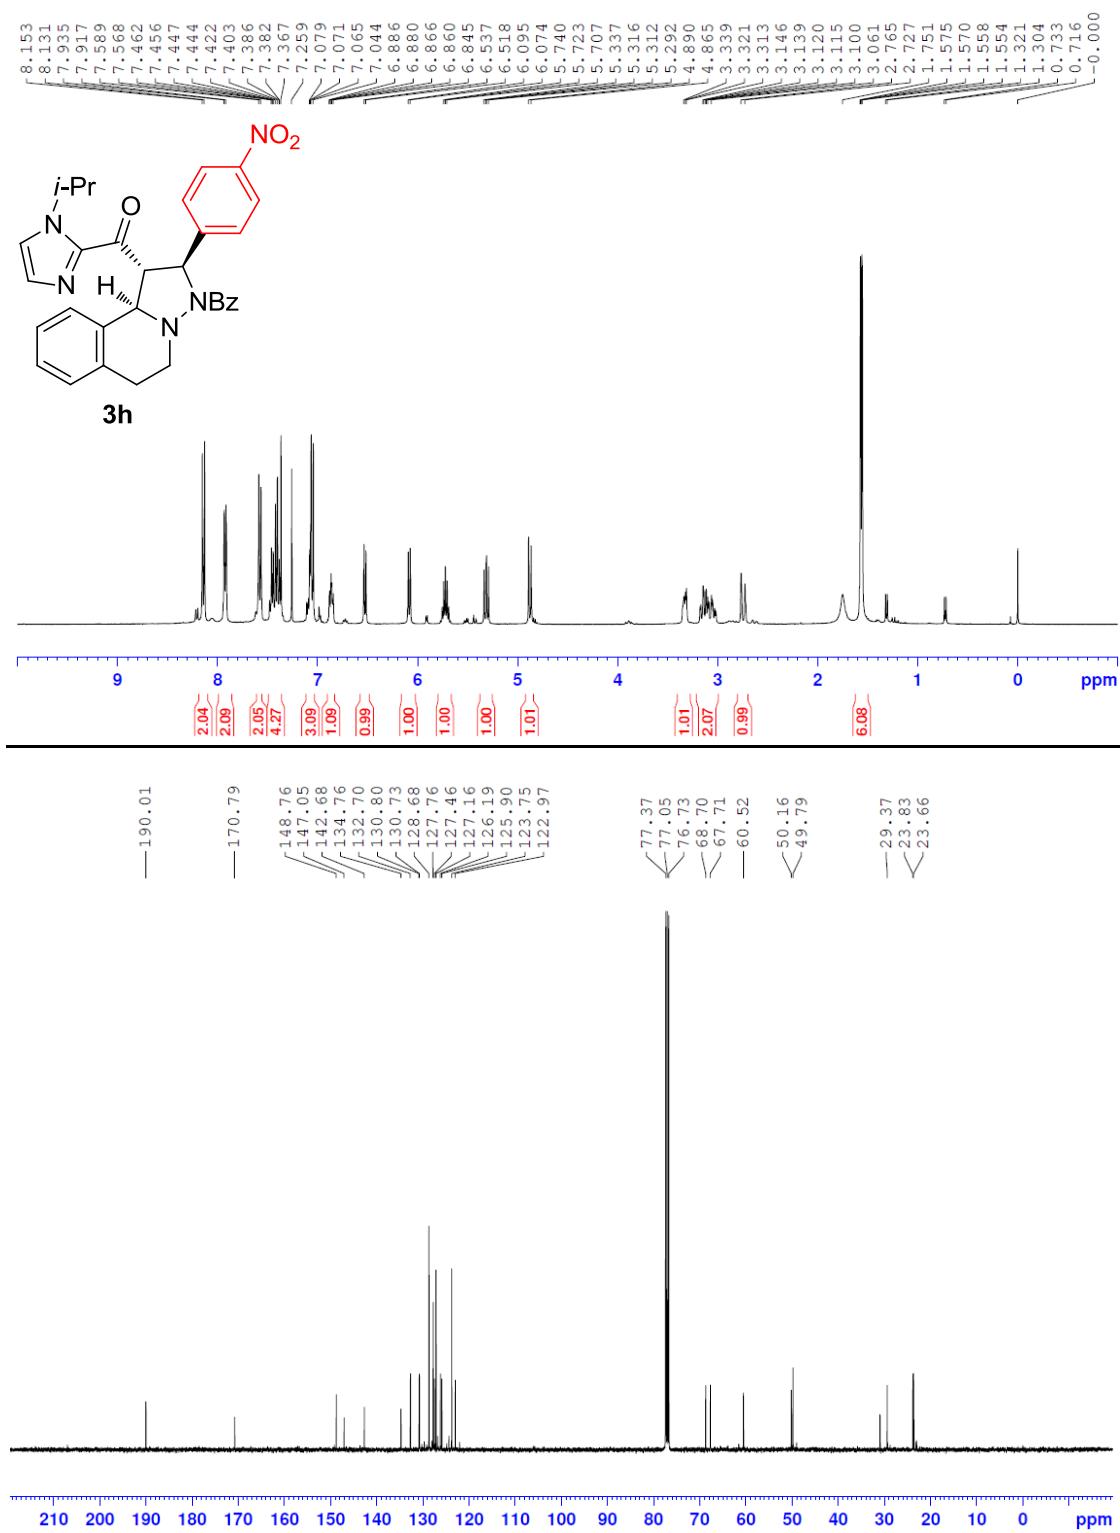



**Compound 3i:**

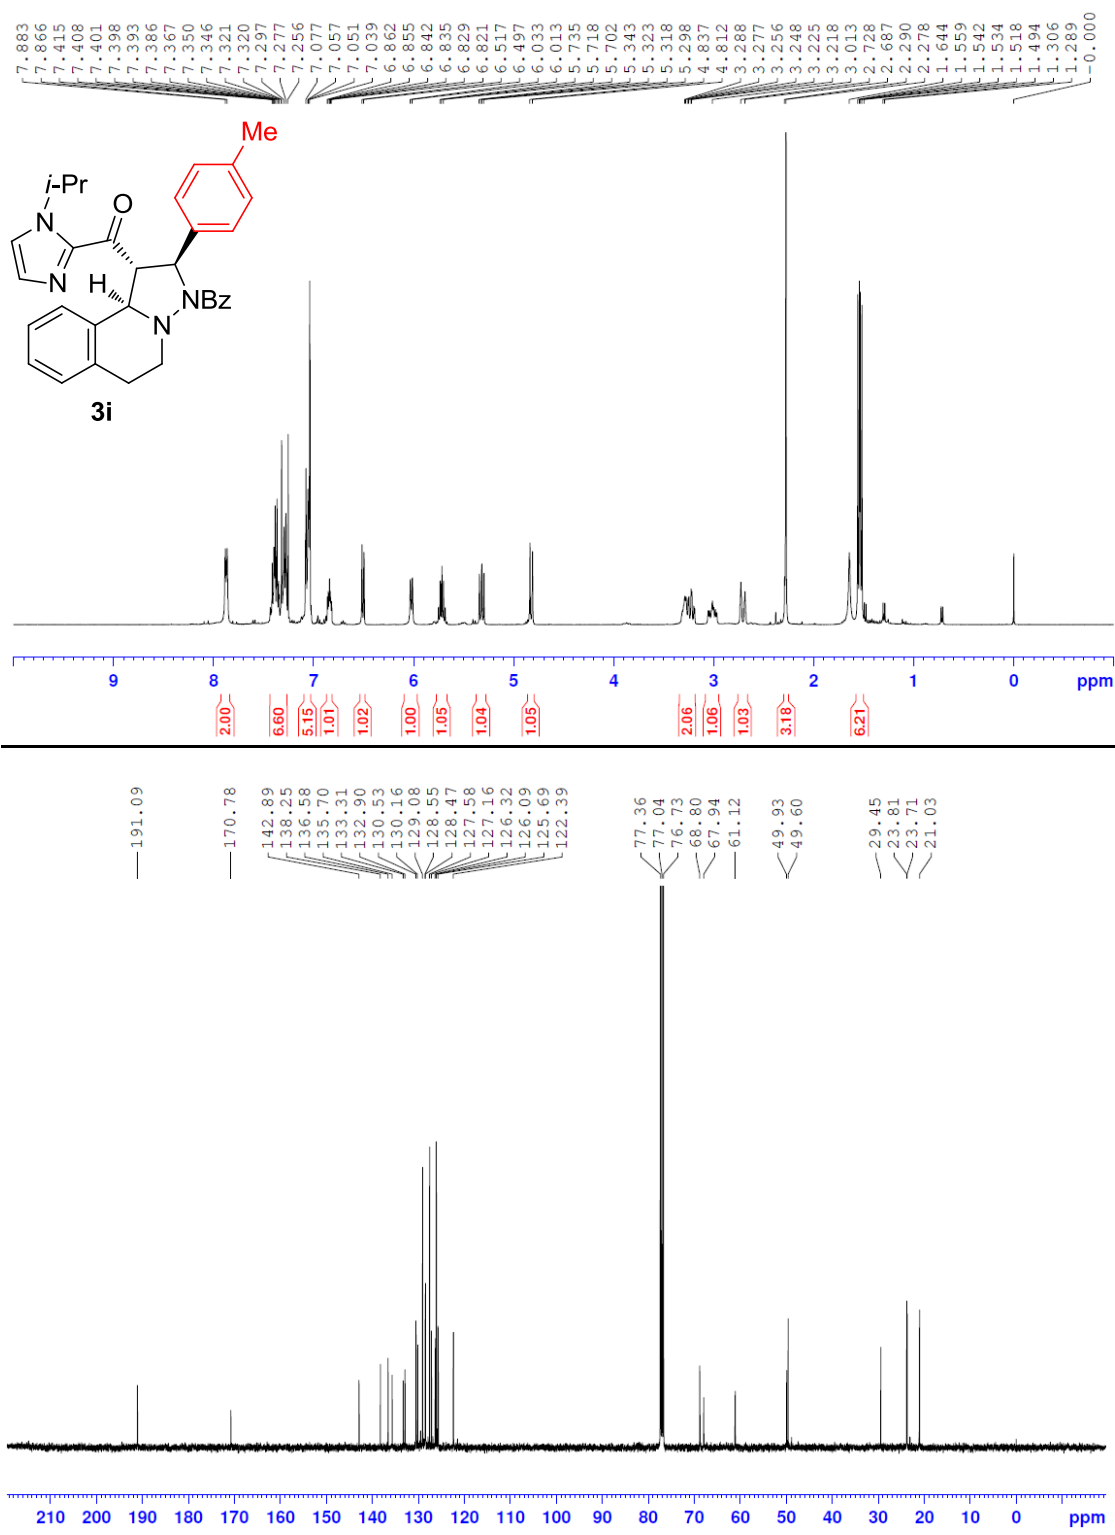

### Compound 3j:

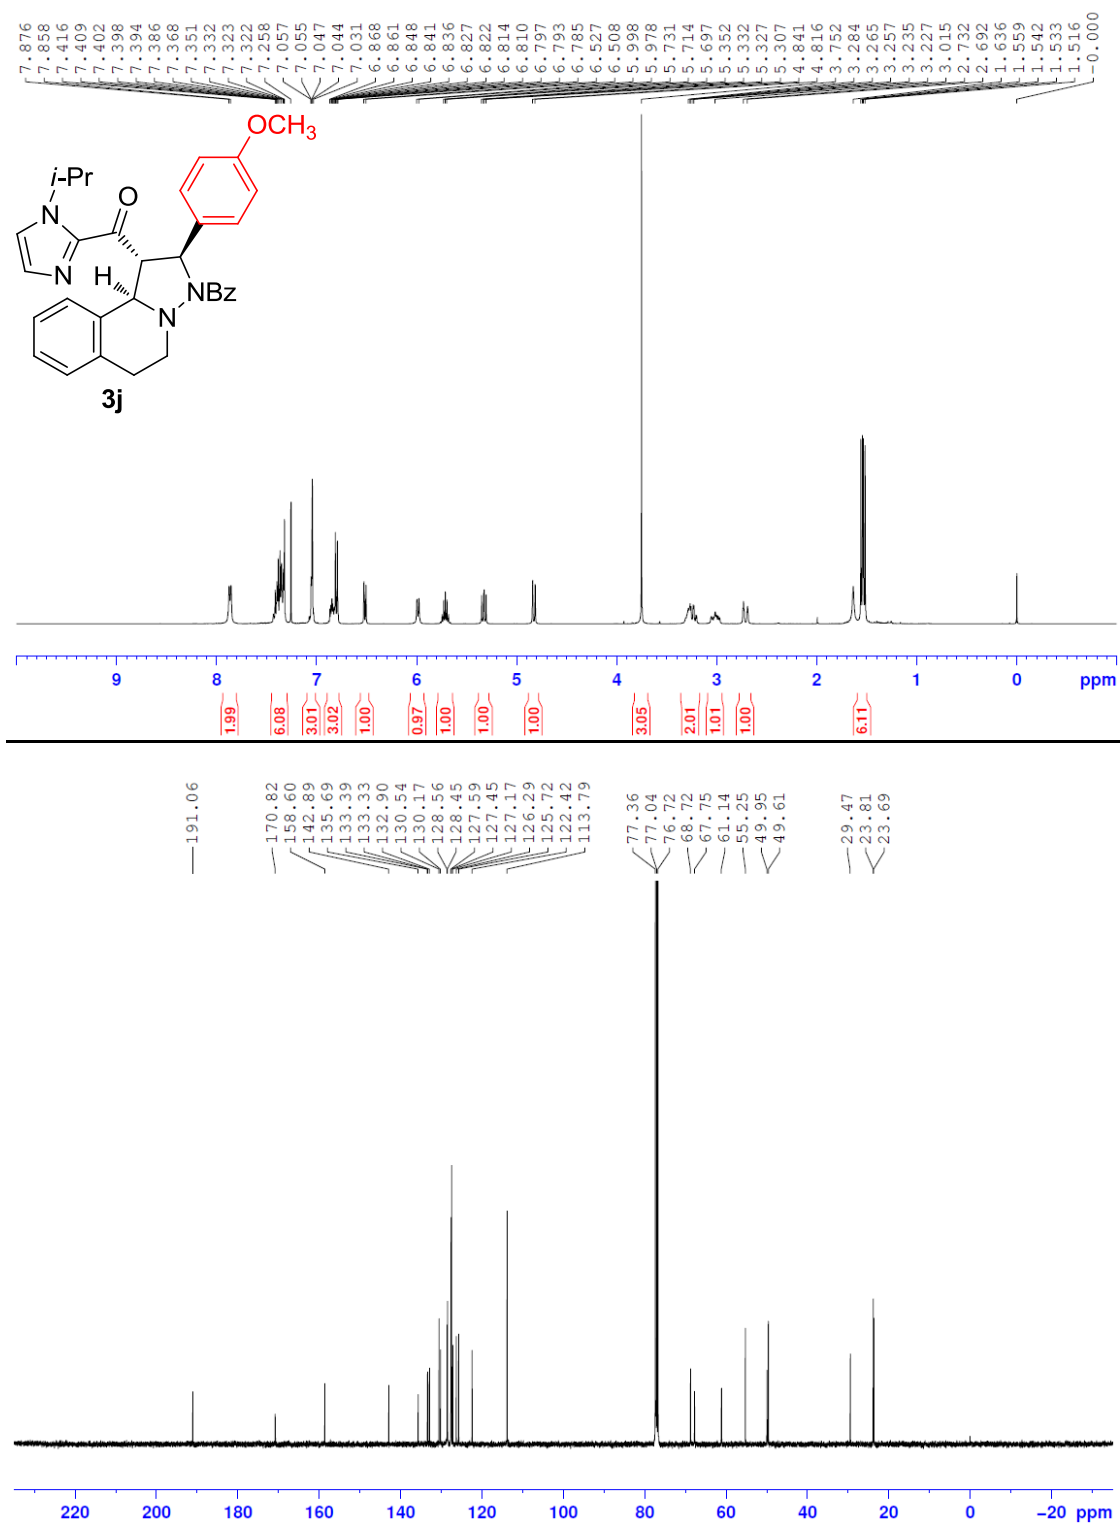

### Compound 3k:

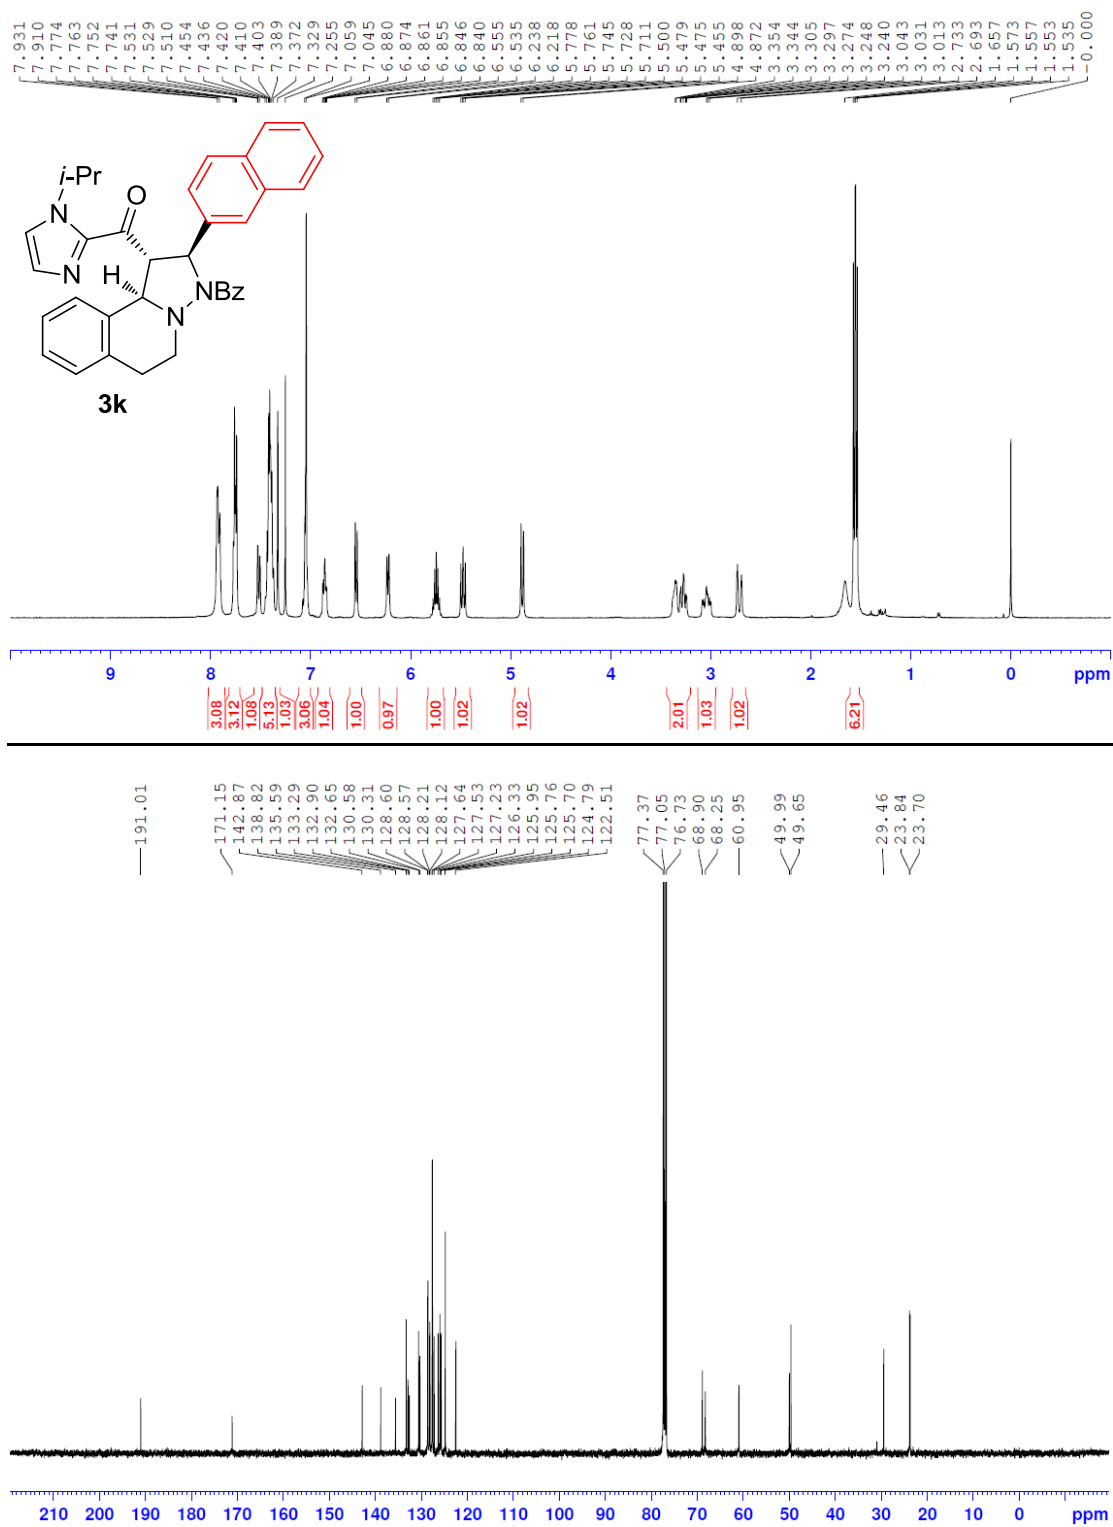

**Compound 3l:**

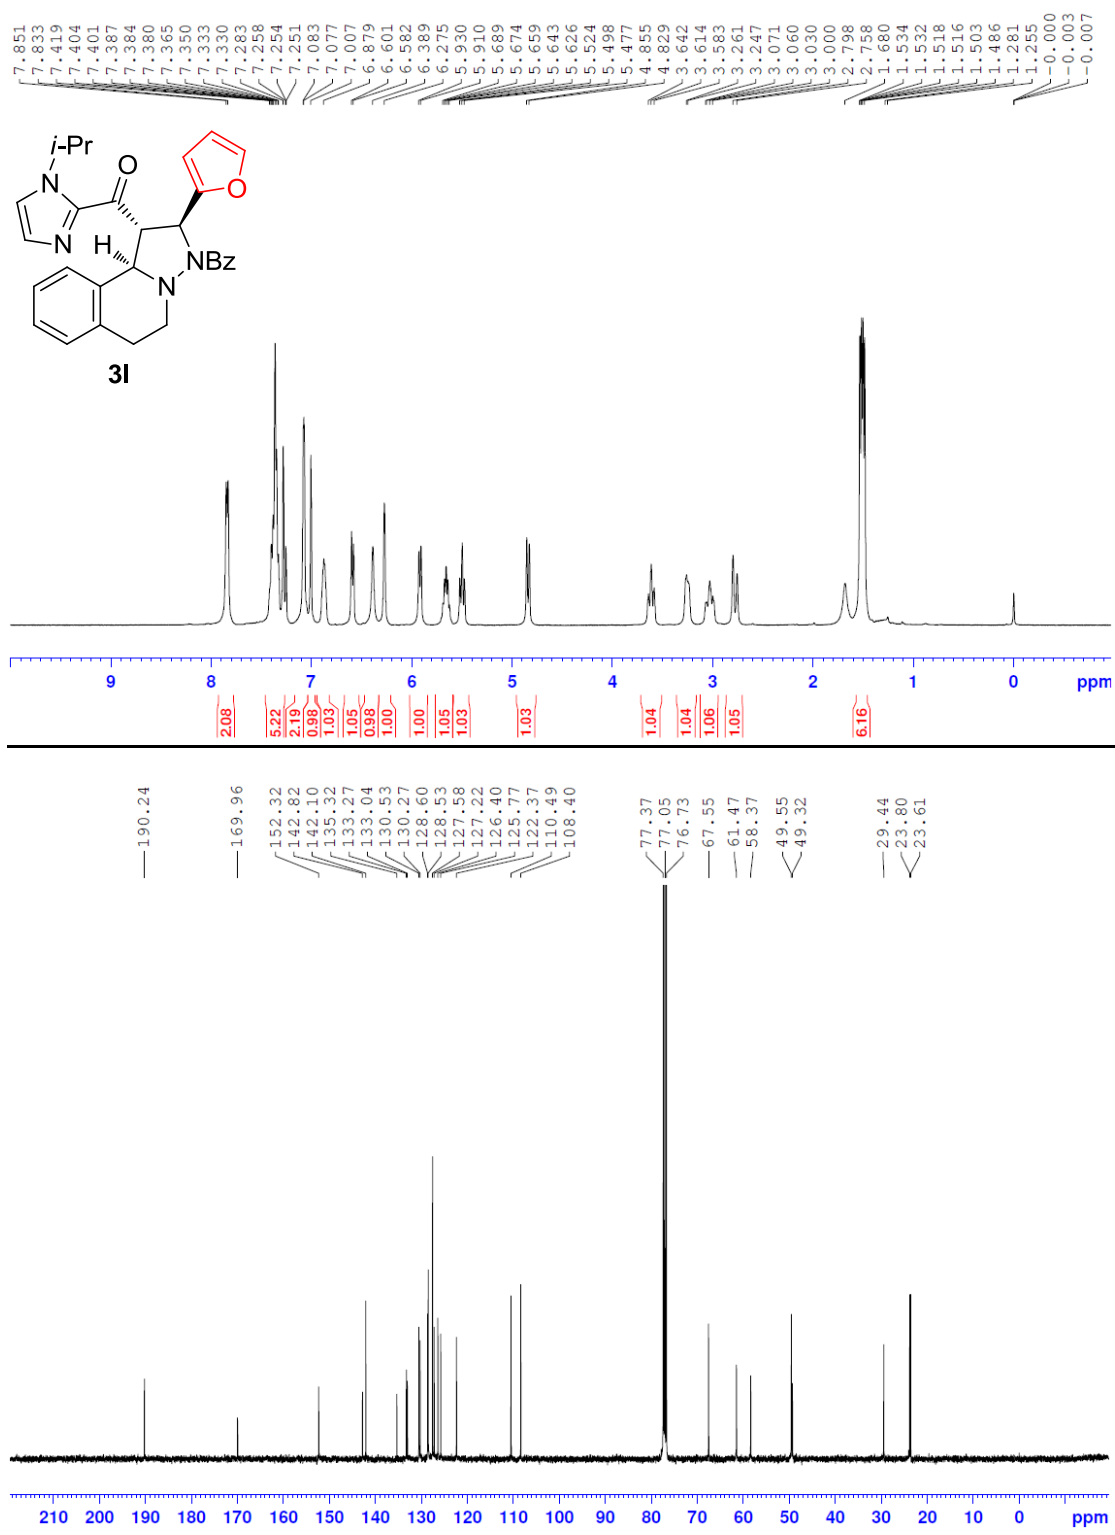

# Compound 3m:

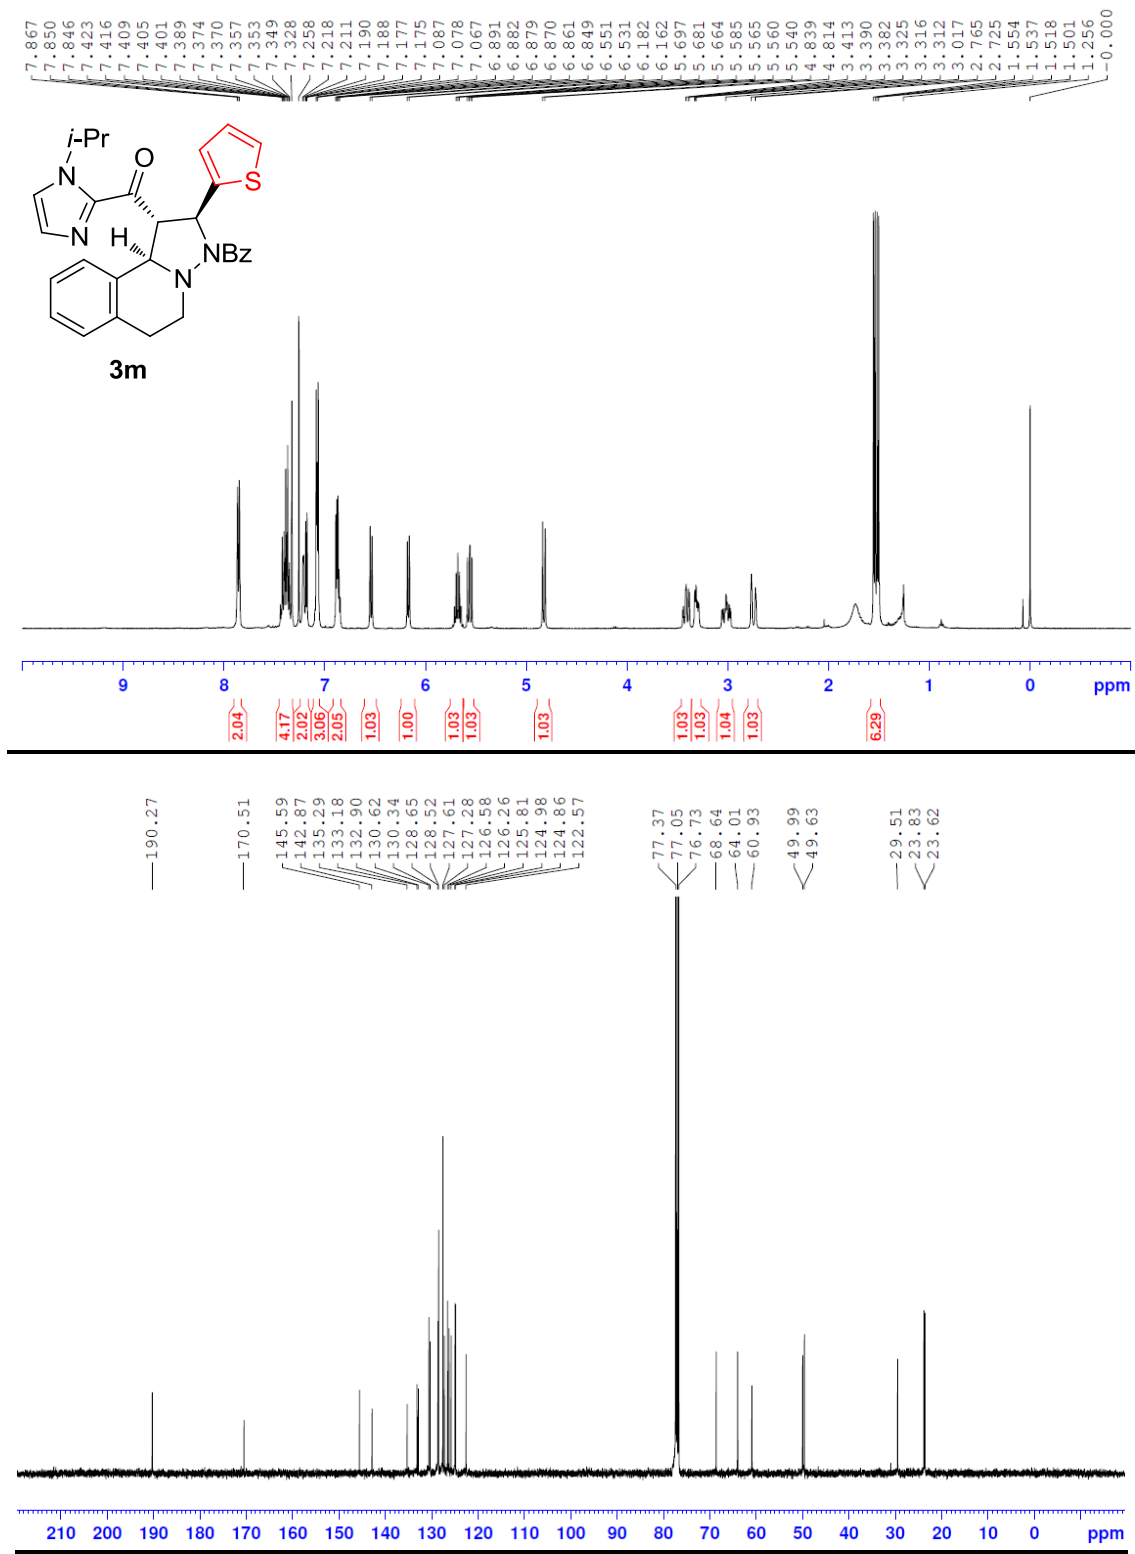

**Compound 3n:**

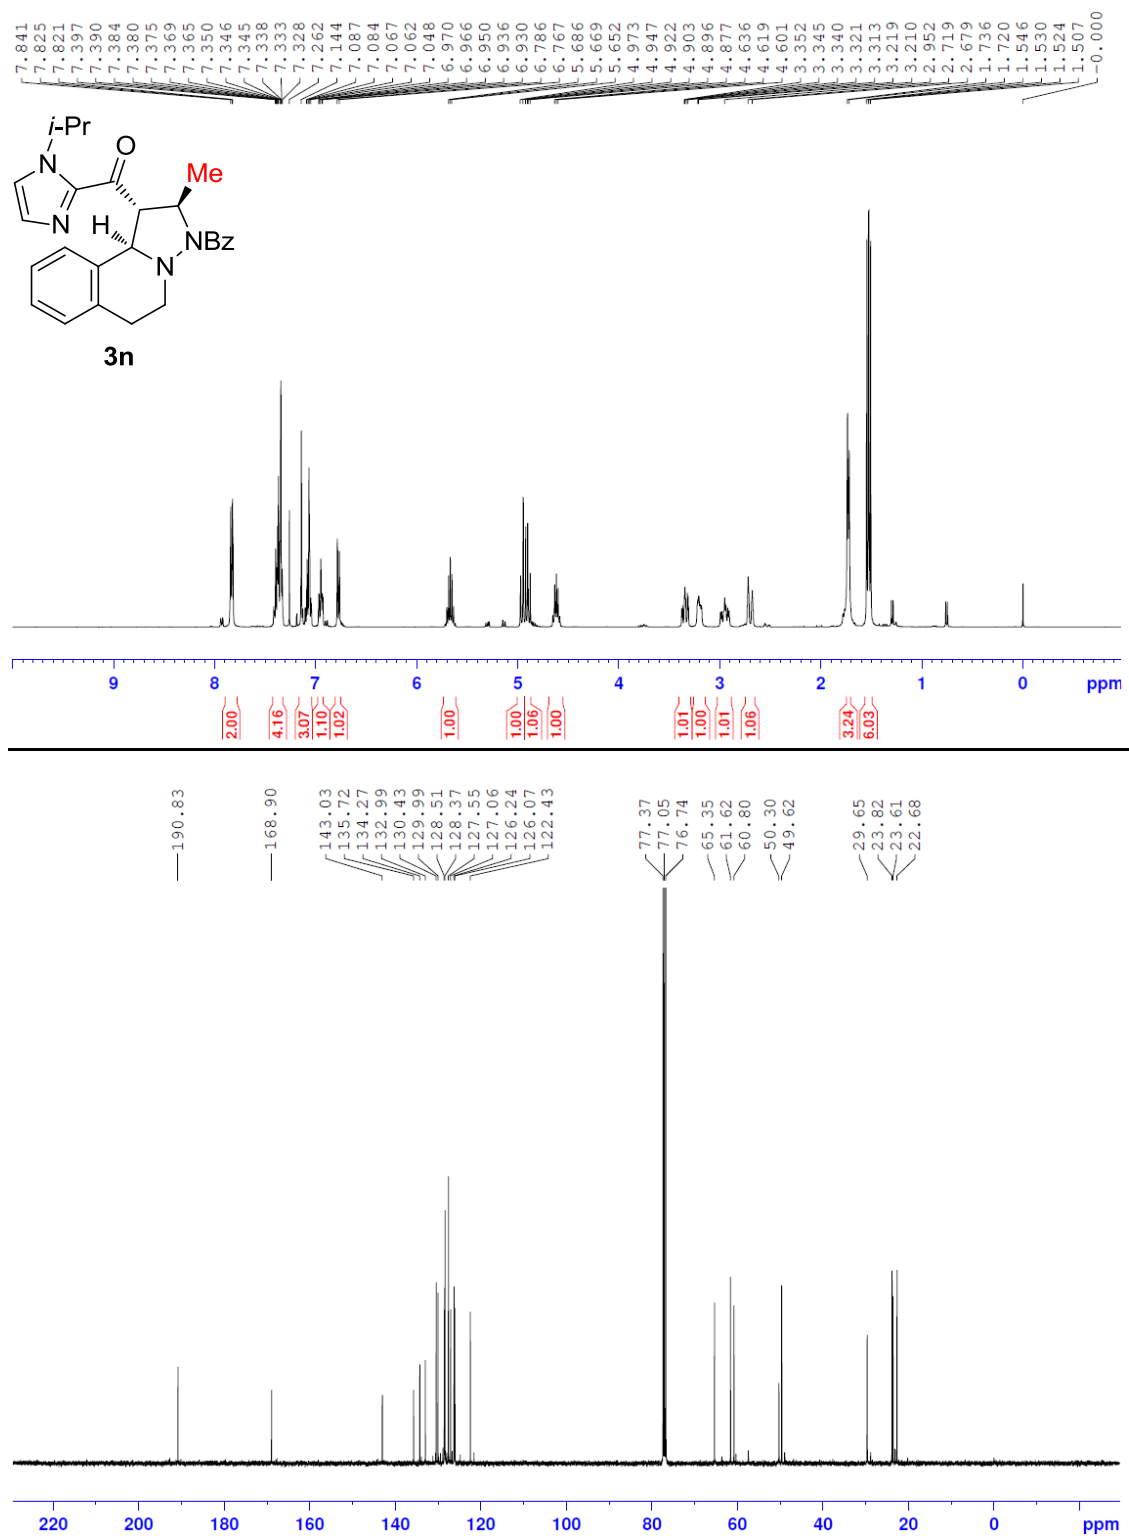

**Compound 30:**

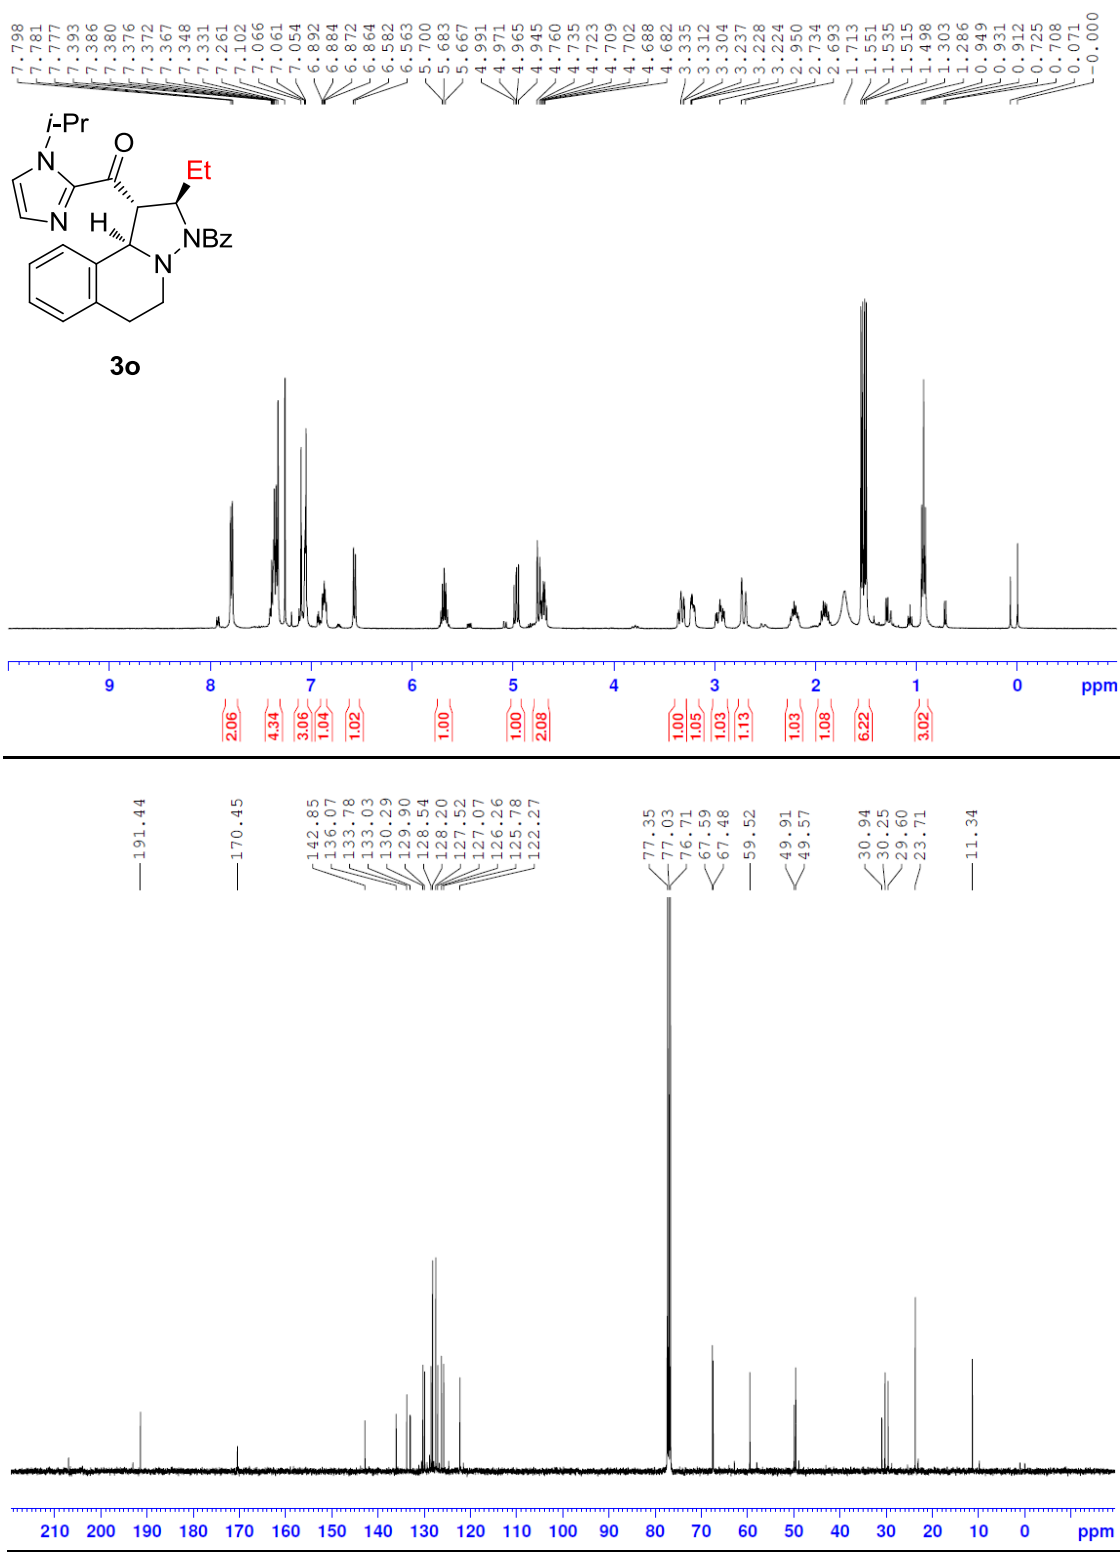

**Compound 3p:**

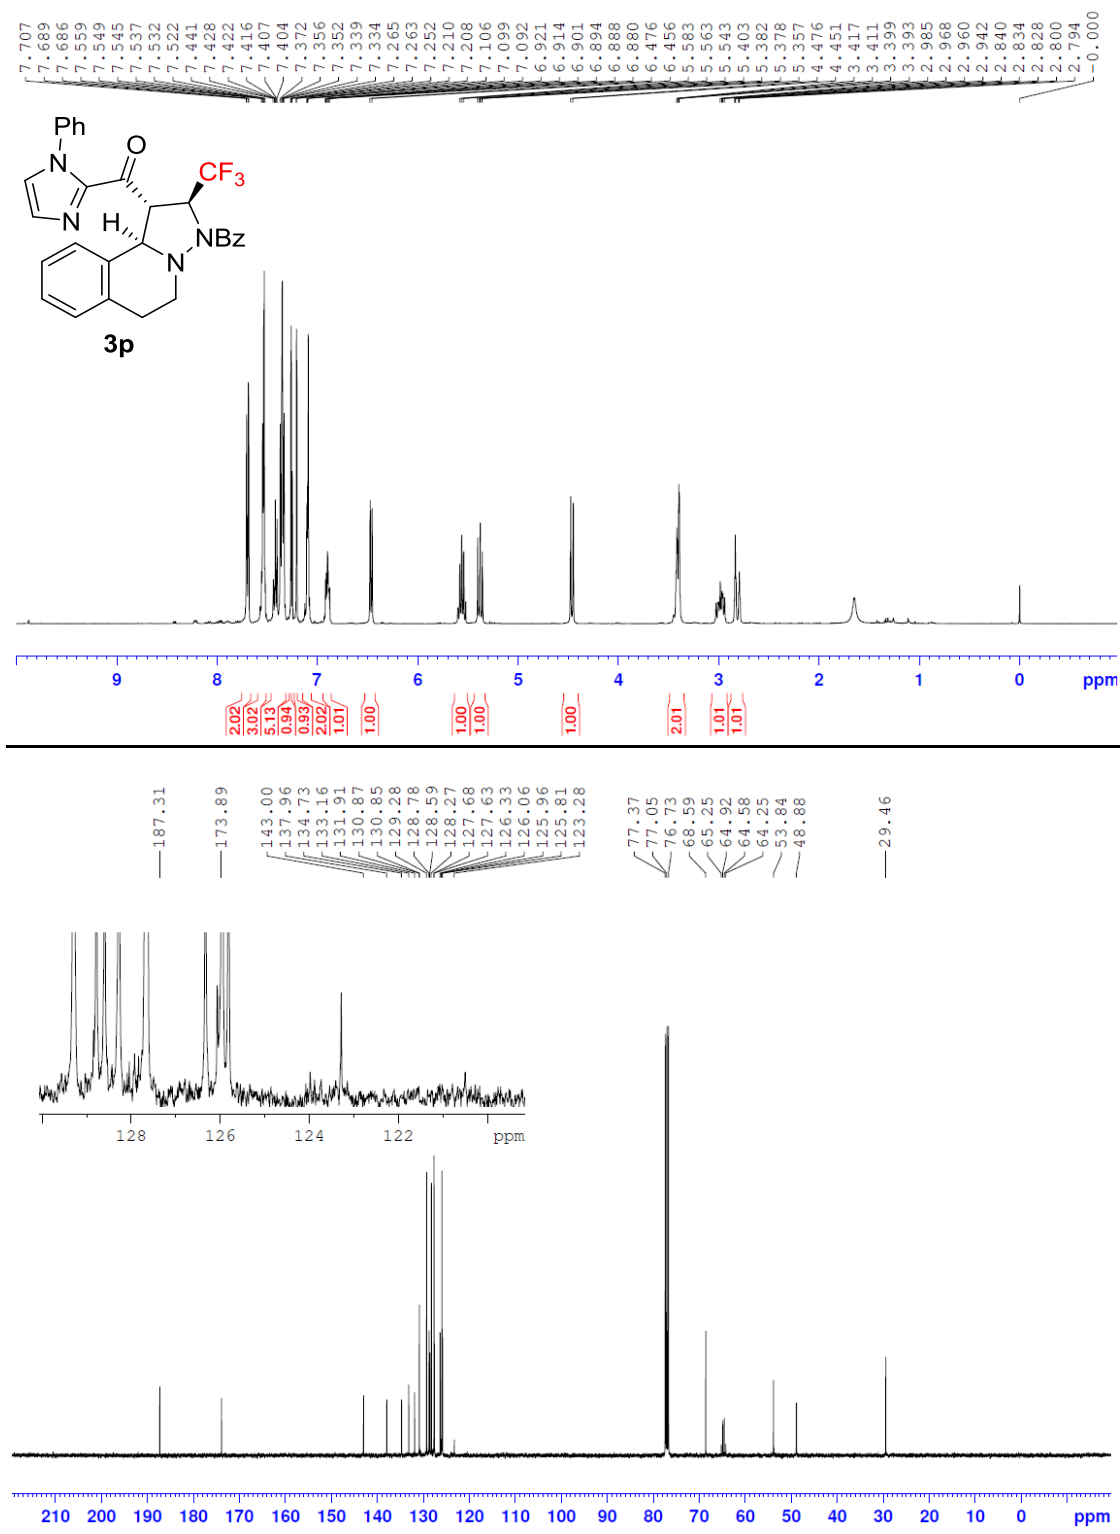



**Compound 3q:**

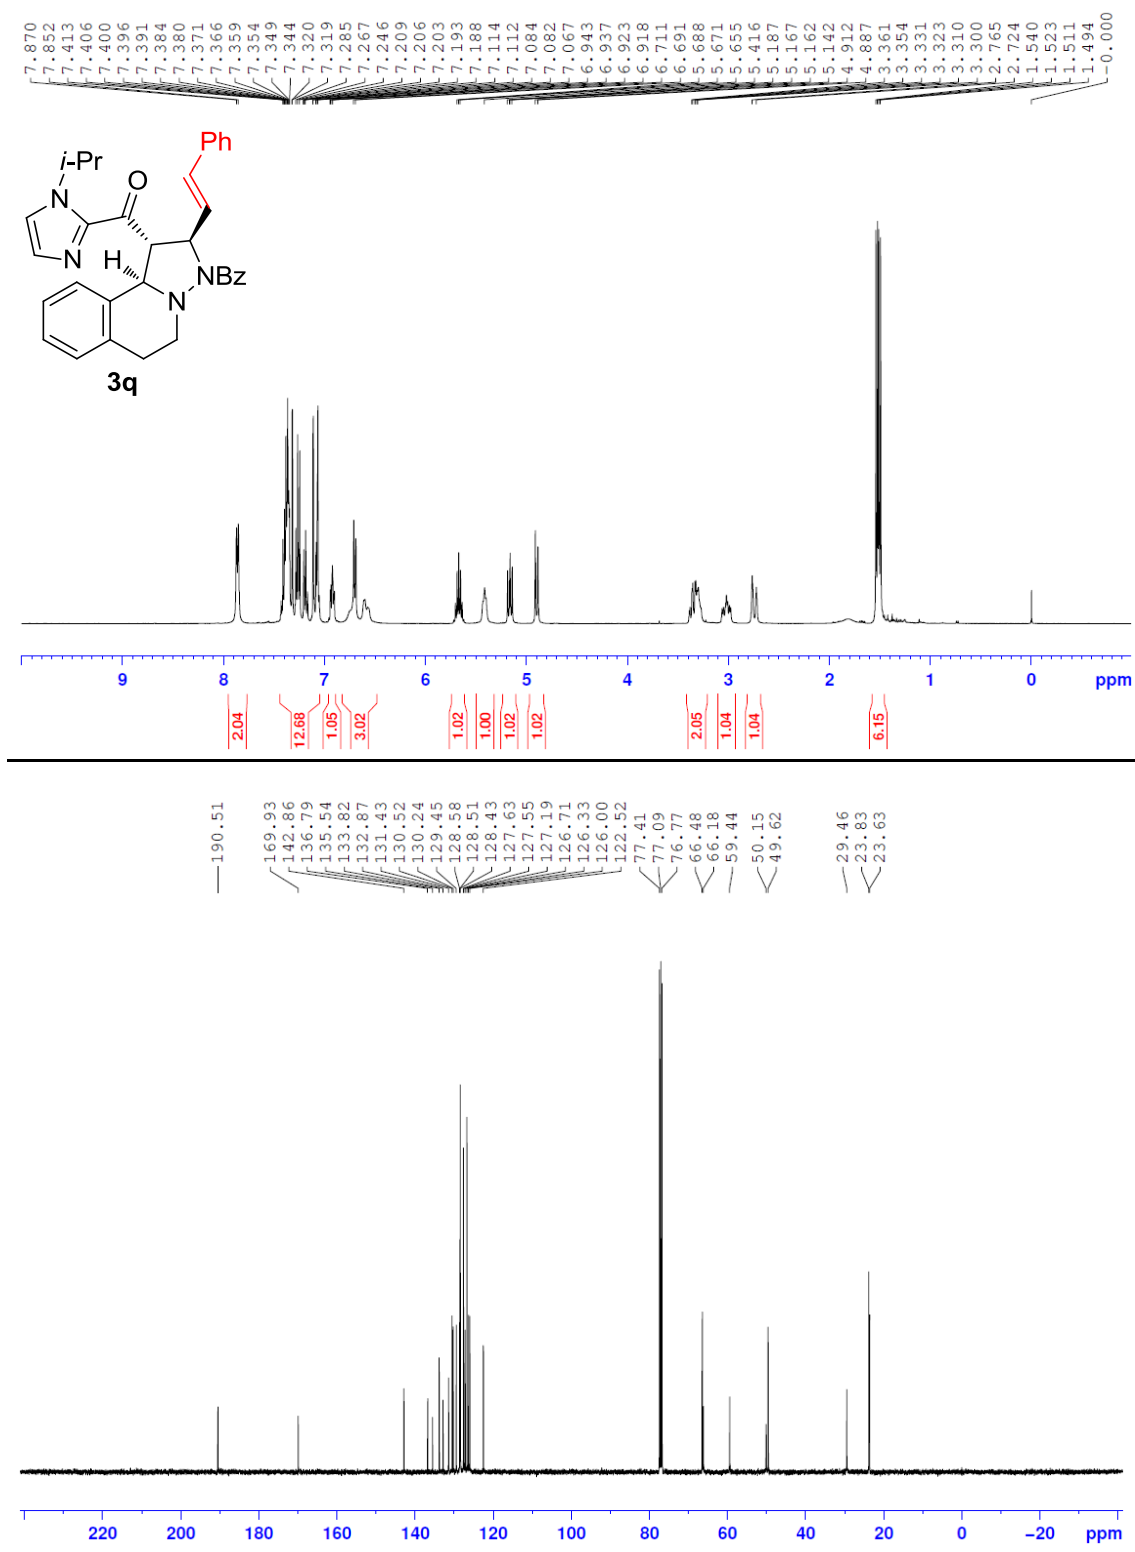

**Compound 3r:**

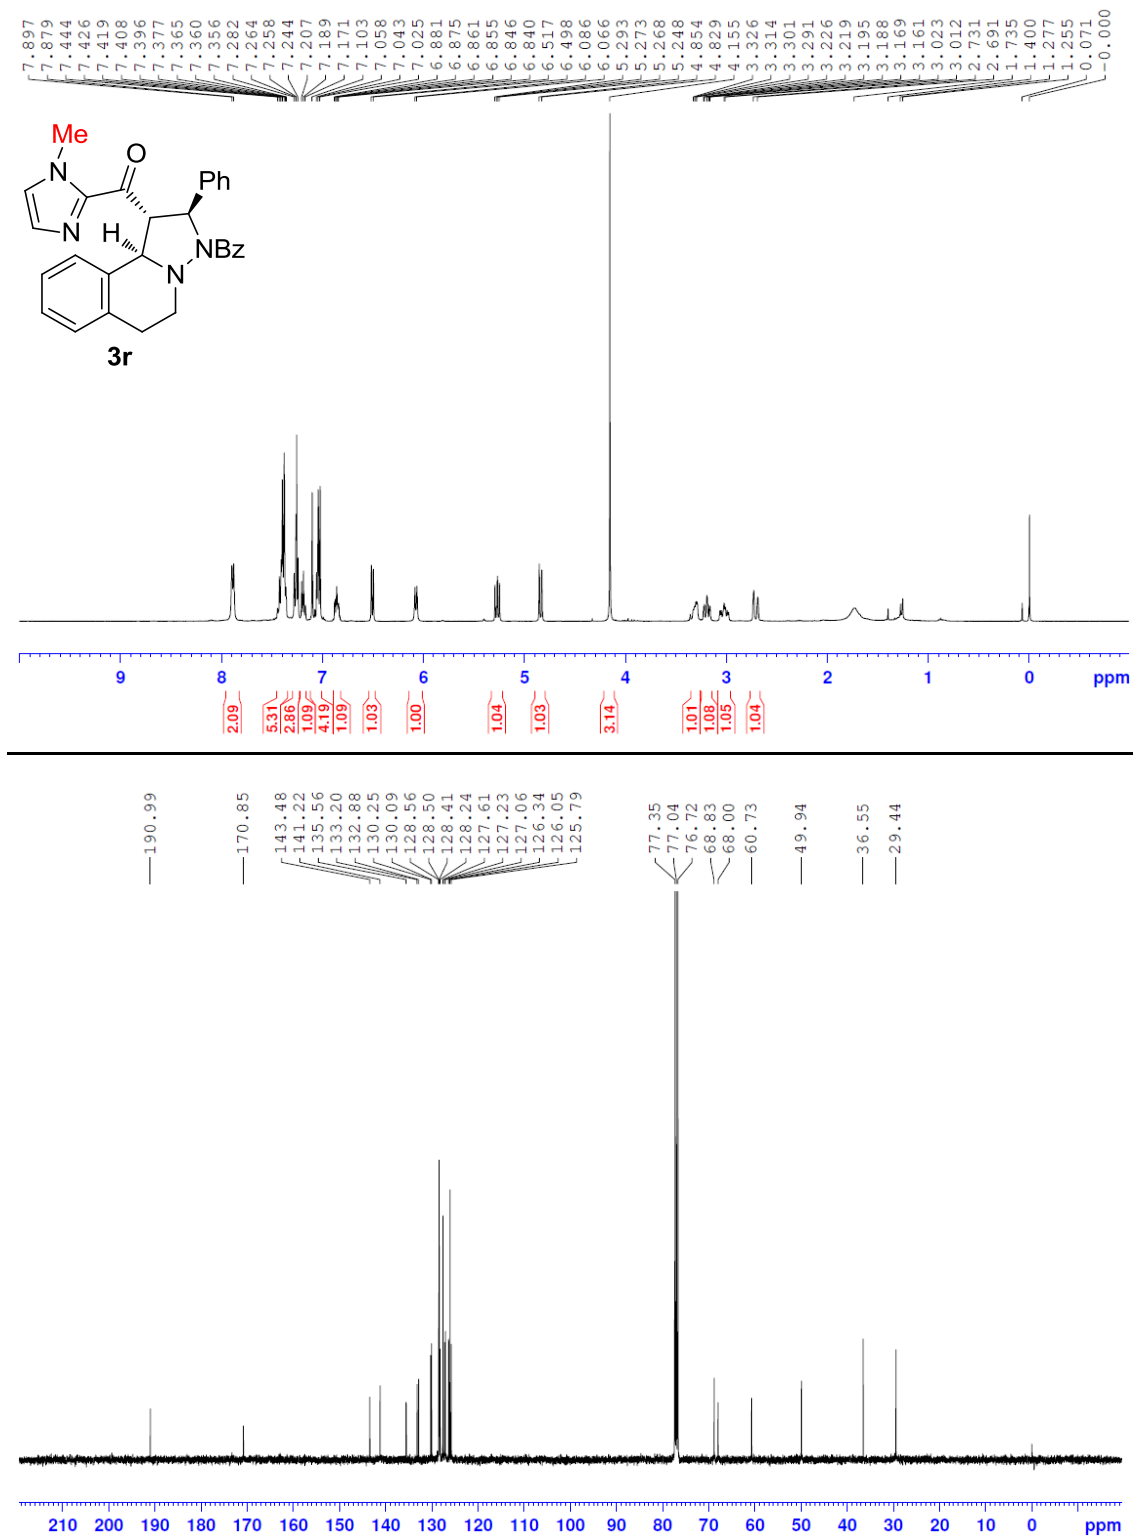

### Compound 3s:

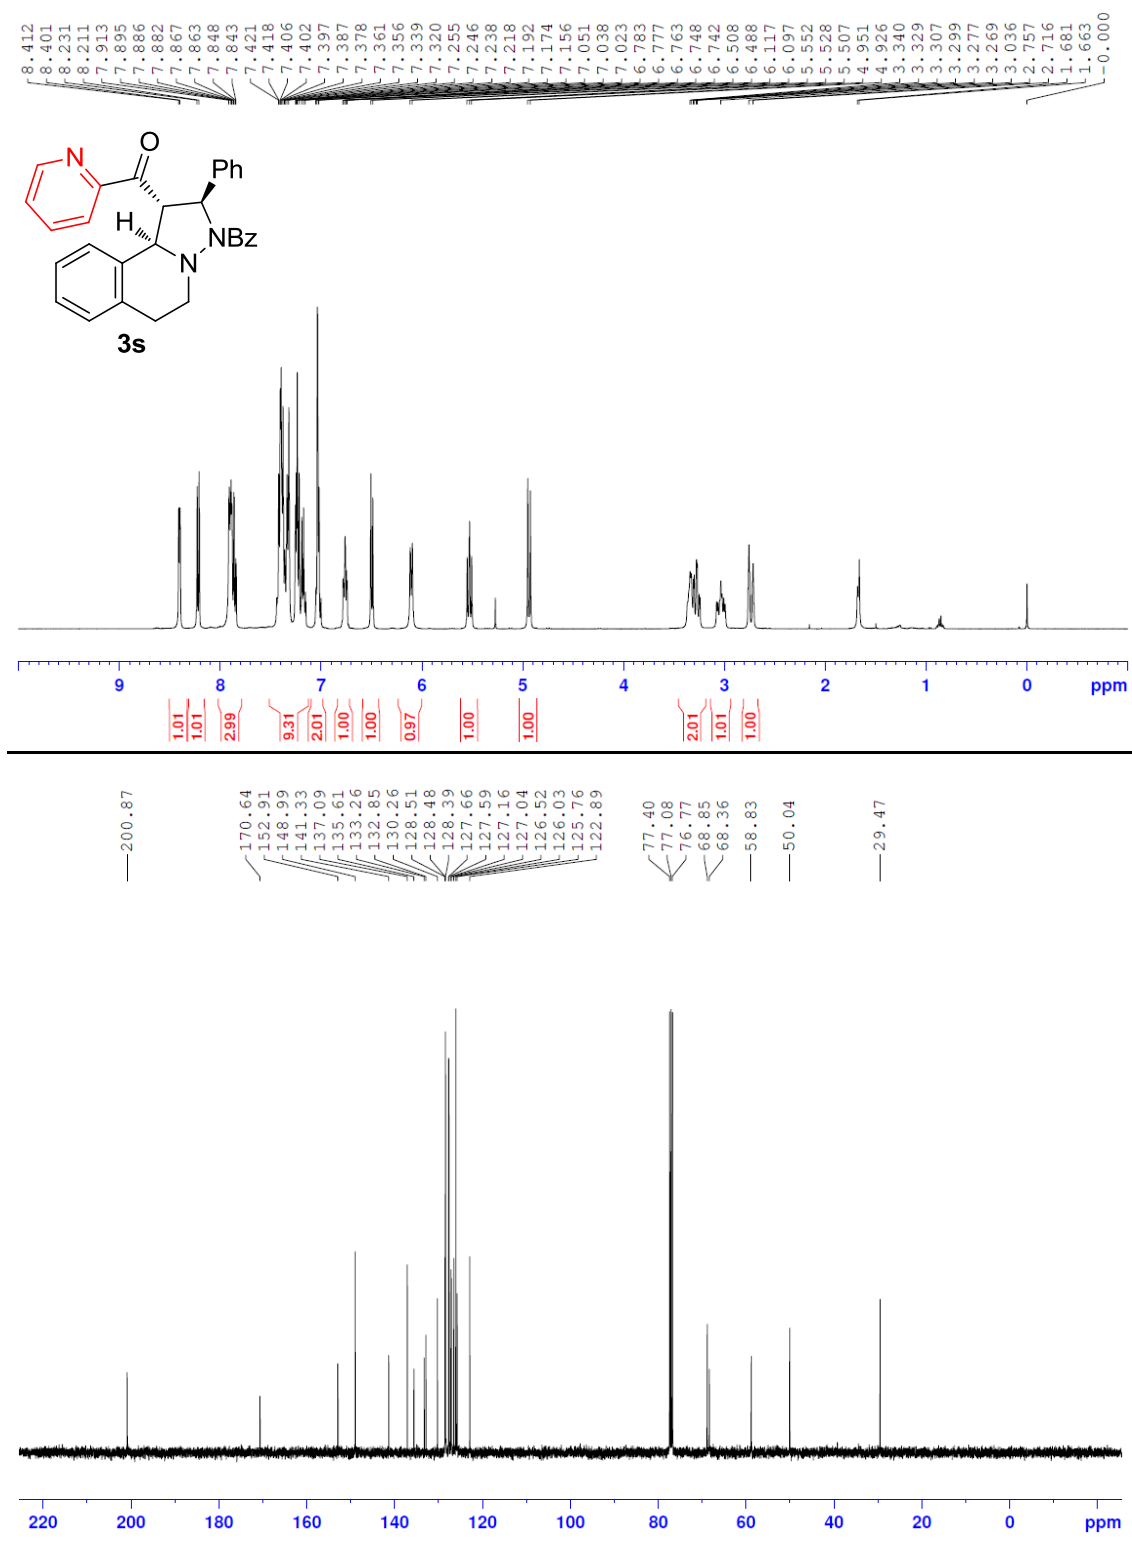

**Compound 3t:**

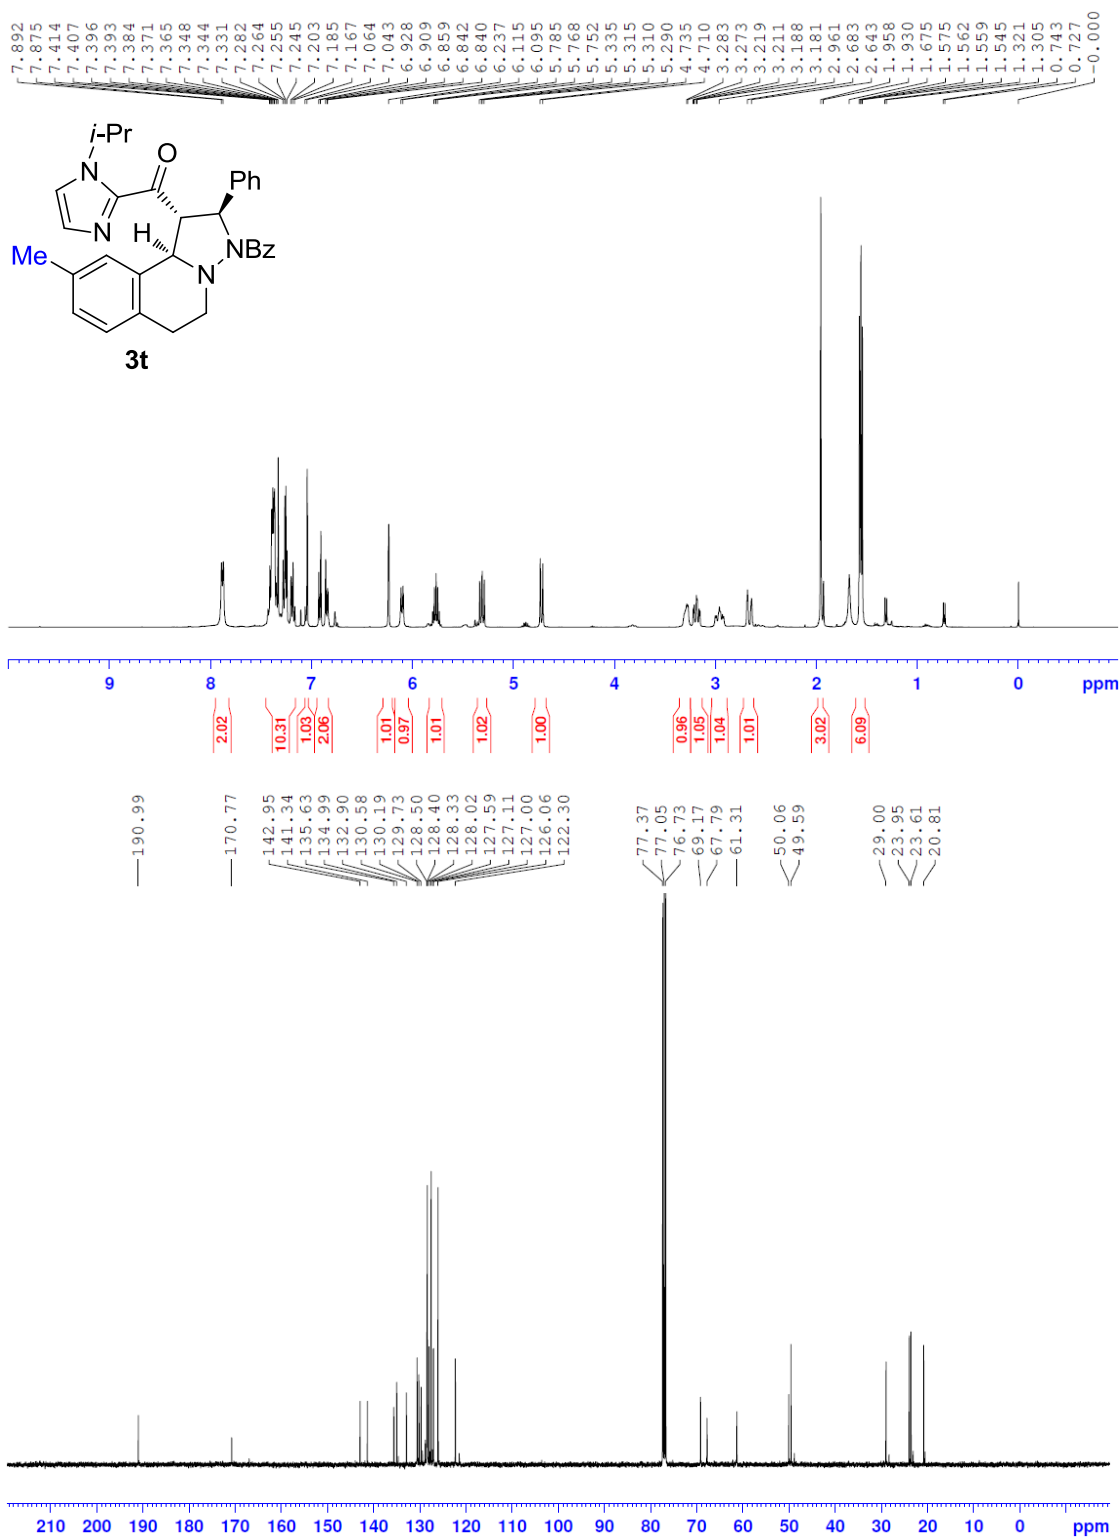

**Compound 3u:**

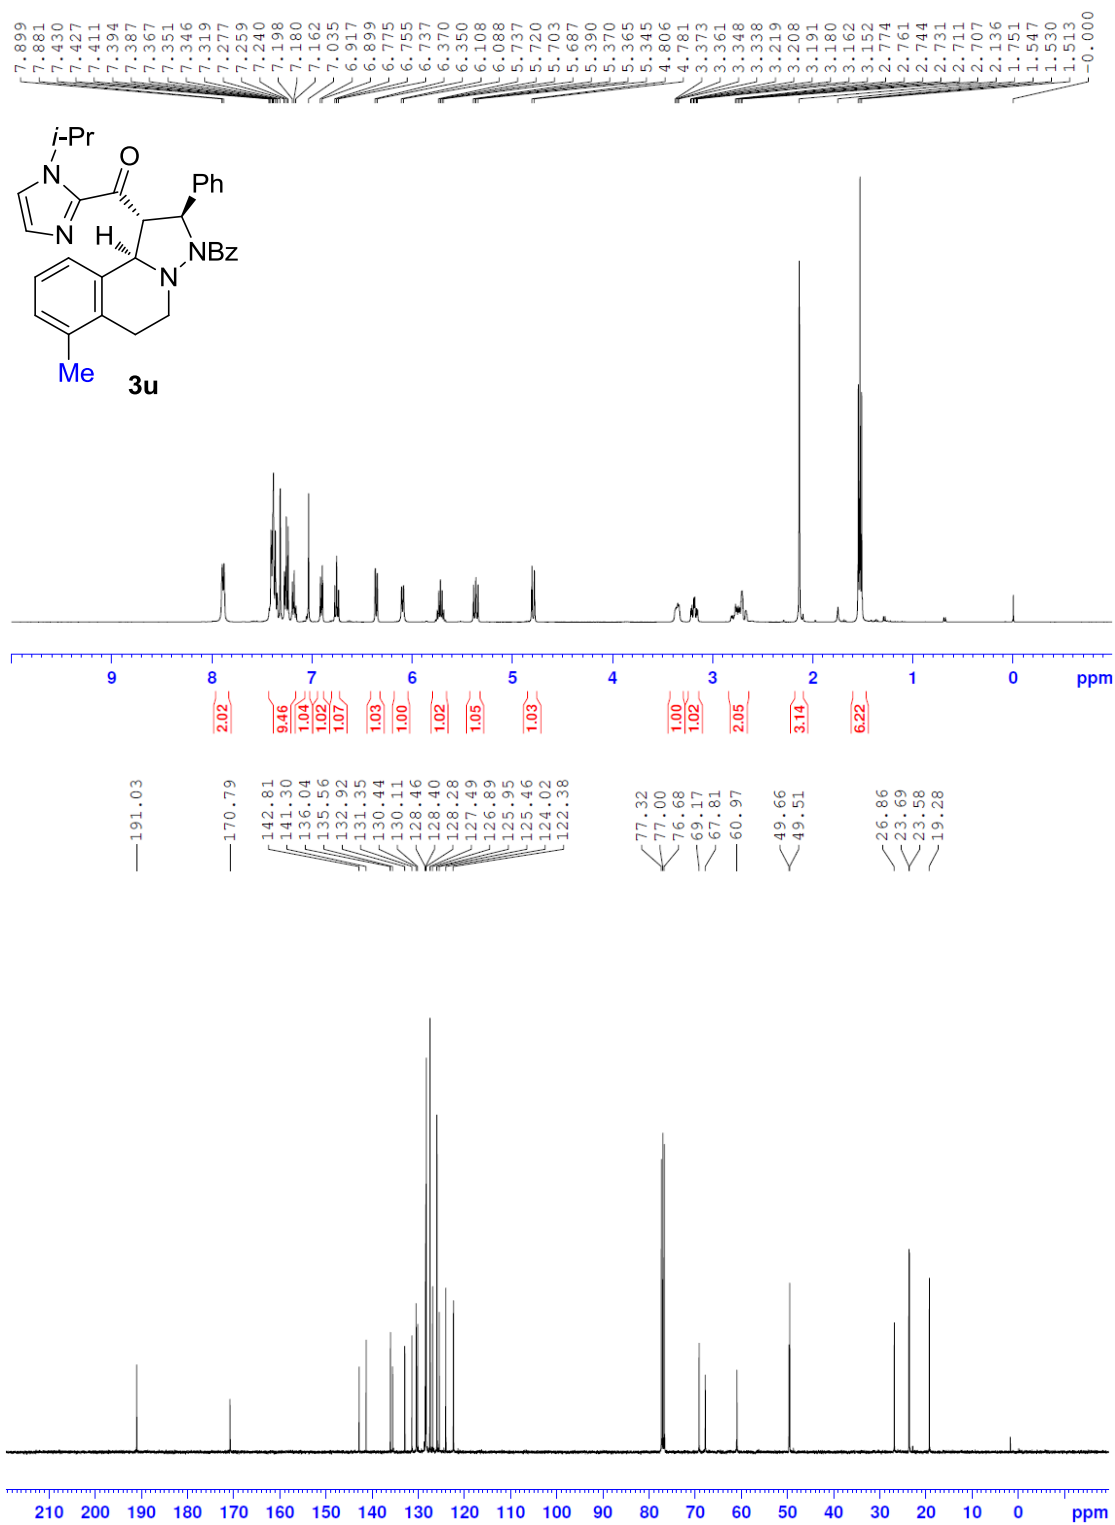

**Compound 3v:**

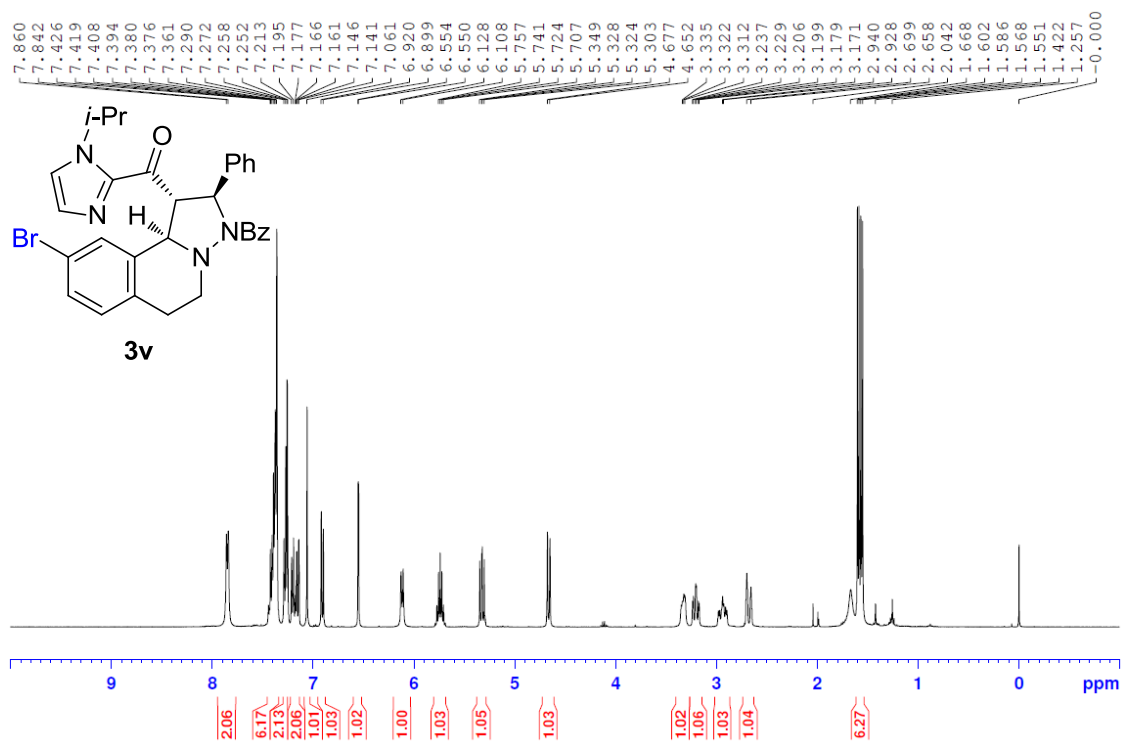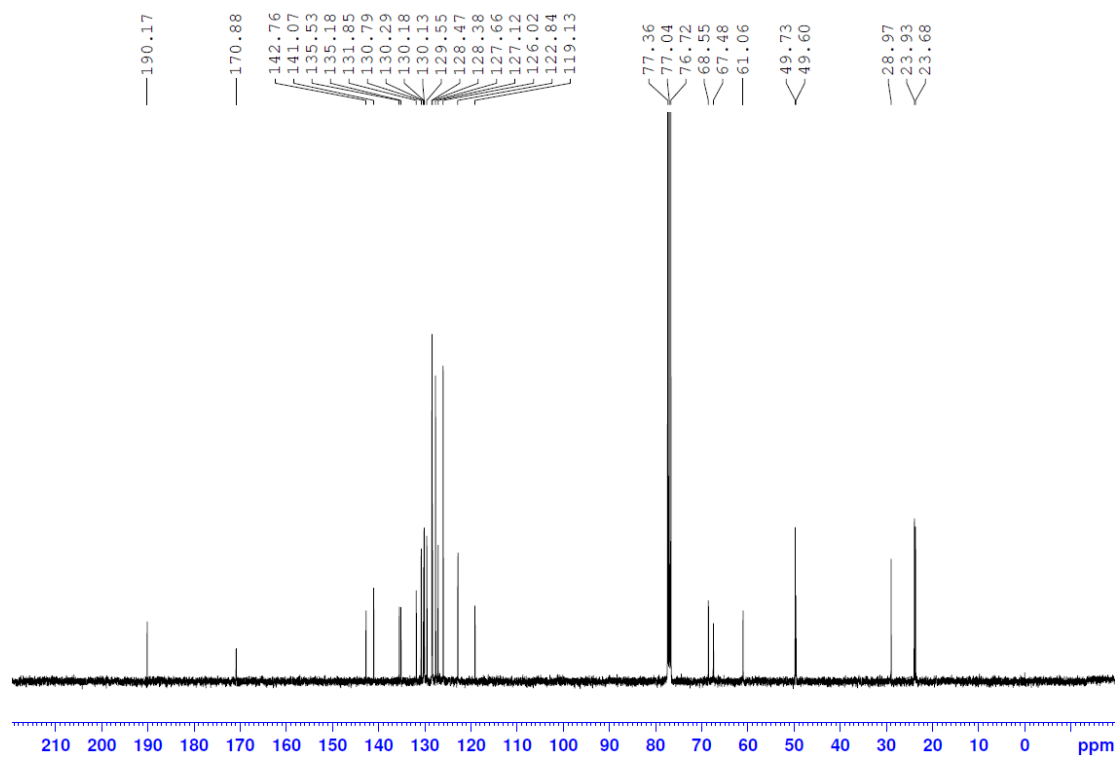

**Compound 4:**

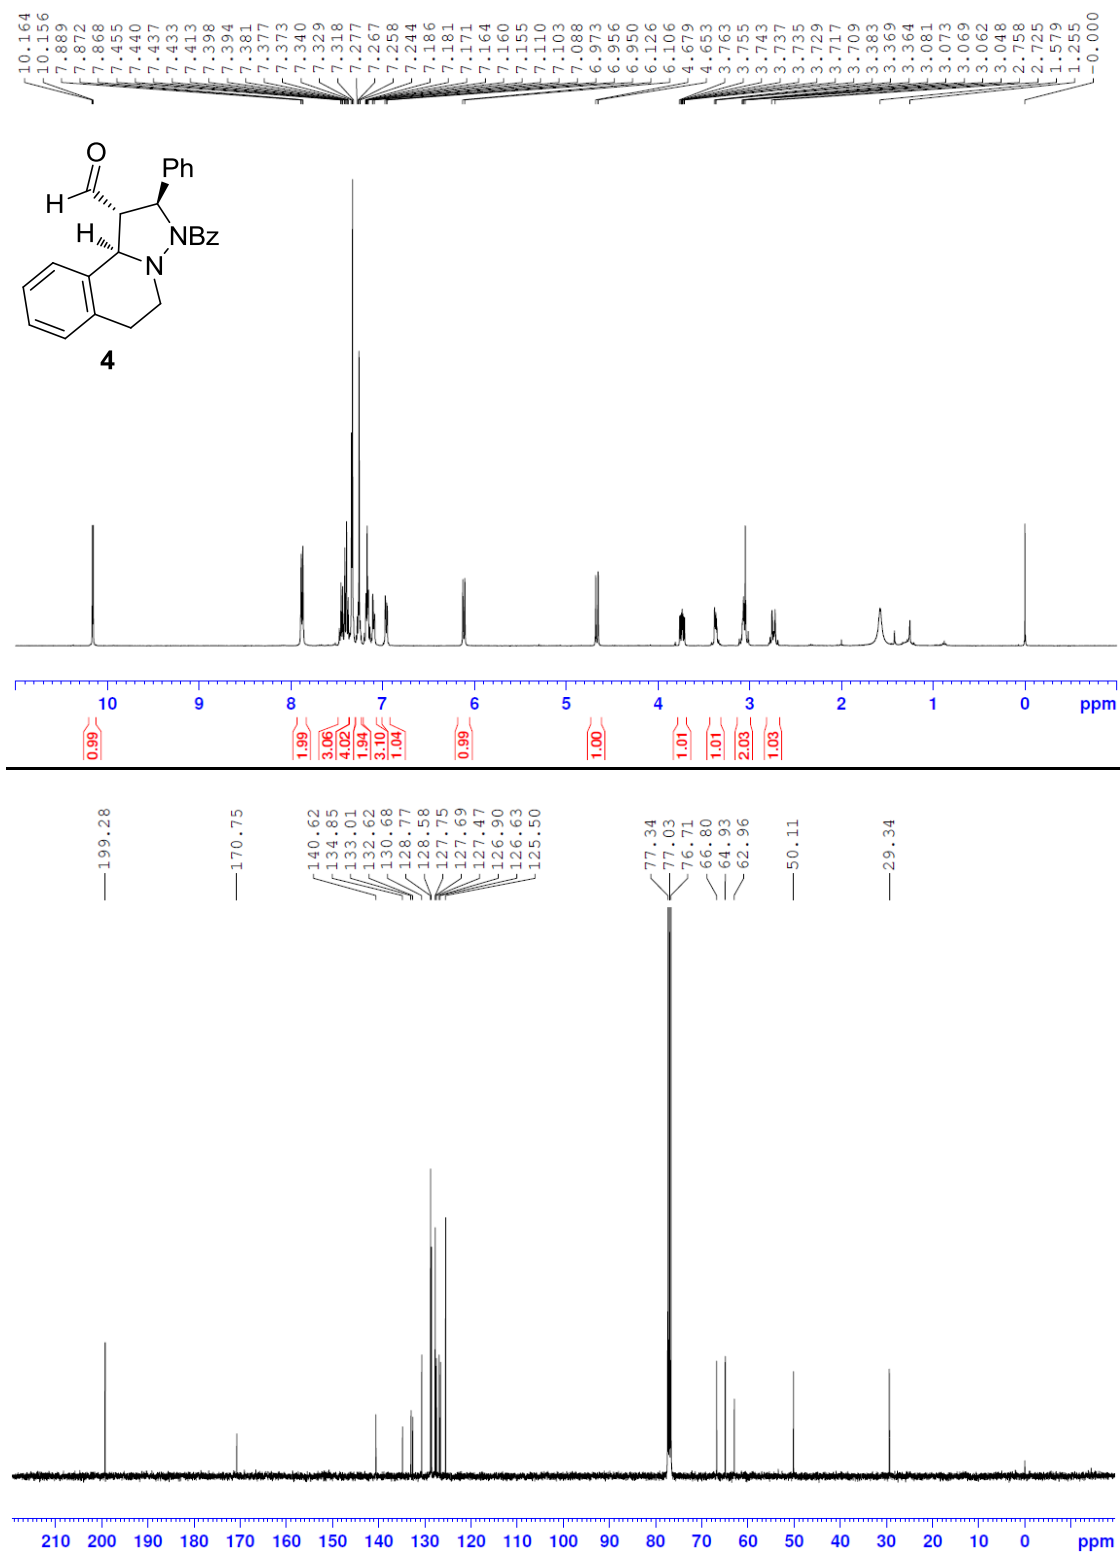

**Compound 5:**

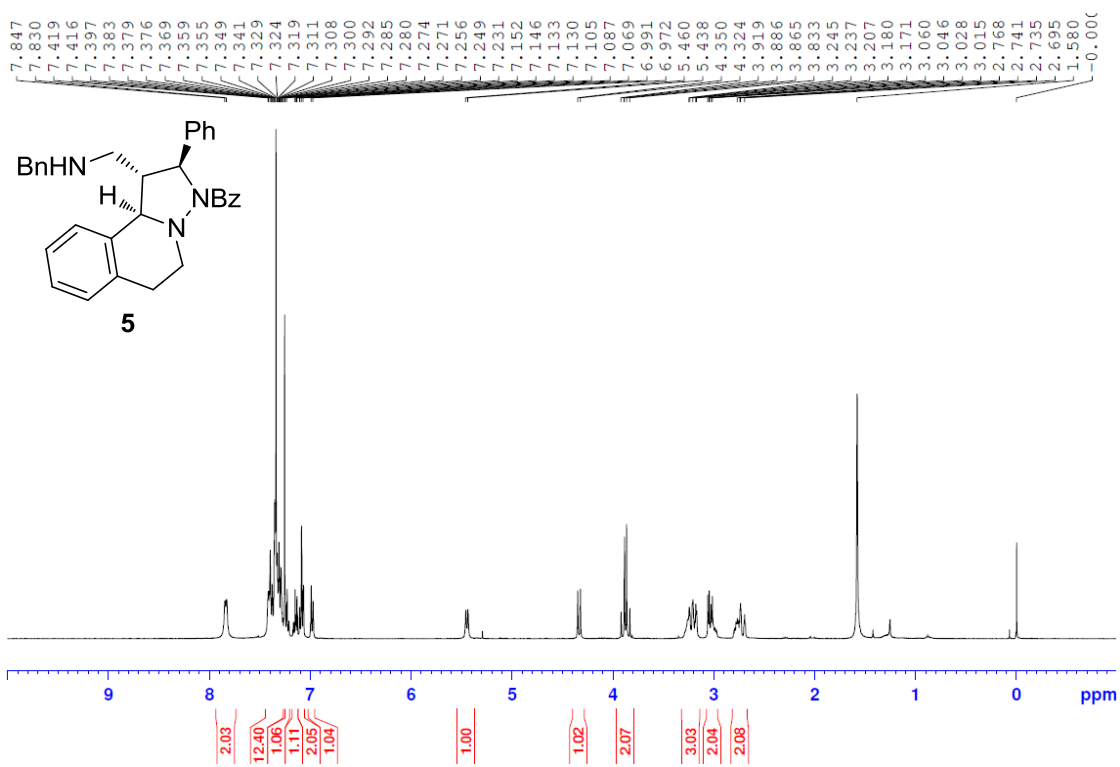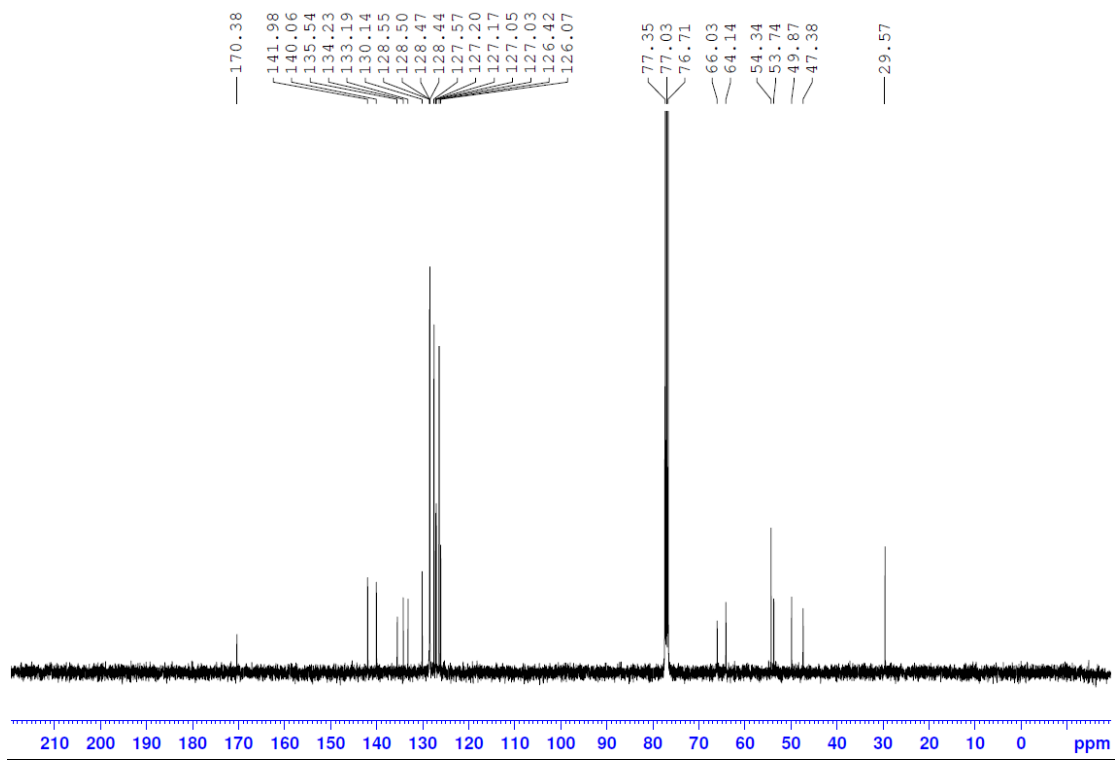



# HPLC Spectra

## Racemic 3a

<Chromatogram>

mV

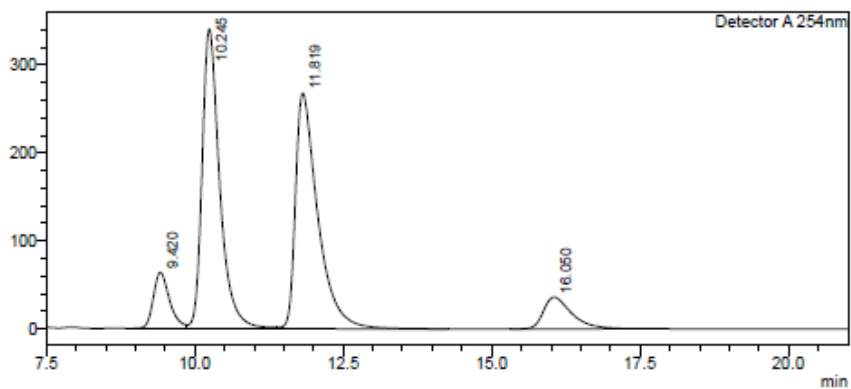

<Peak Table>

Detector A 254nm

| Peak# | Ret. Time | Area     | Height | Conc.  | Unit | Mark | Name |
|-------|-----------|----------|--------|--------|------|------|------|
| 1     | 9.420     | 1212094  | 63707  | 7.378  |      |      |      |
| 2     | 10.246    | 7007072  | 340118 | 42.650 |      | V    |      |
| 3     | 11.819    | 7008989  | 267531 | 42.662 |      | V    |      |
| 4     | 16.050    | 1201053  | 36086  | 7.310  |      |      |      |
| Total |           | 16429209 | 707442 |        |      |      |      |

## Chiral 3a

<Chromatogram>

mV

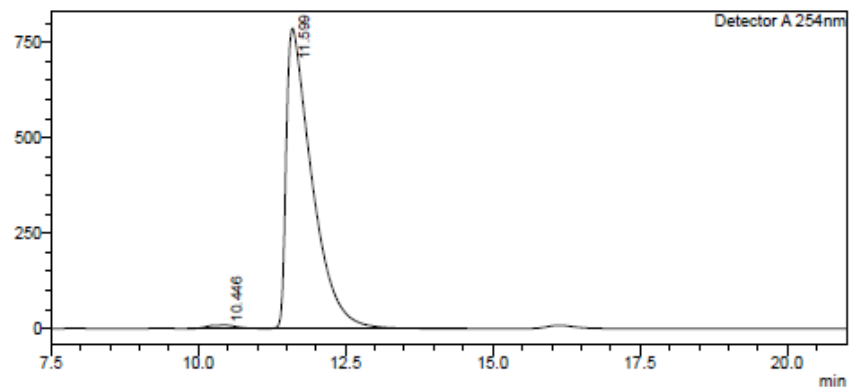

<Peak Table>

Detector A 254nm

| Peak# | Ret. Time | Area     | Height | Conc.  | Unit | Mark | Name |
|-------|-----------|----------|--------|--------|------|------|------|
| 1     | 10.446    | 295594   | 8700   | 1.224  |      |      |      |
| 2     | 11.599    | 23862169 | 785701 | 98.776 |      | V    |      |
| Total |           | 24157763 | 794401 |        |      |      |      |

## Racemic **3b**

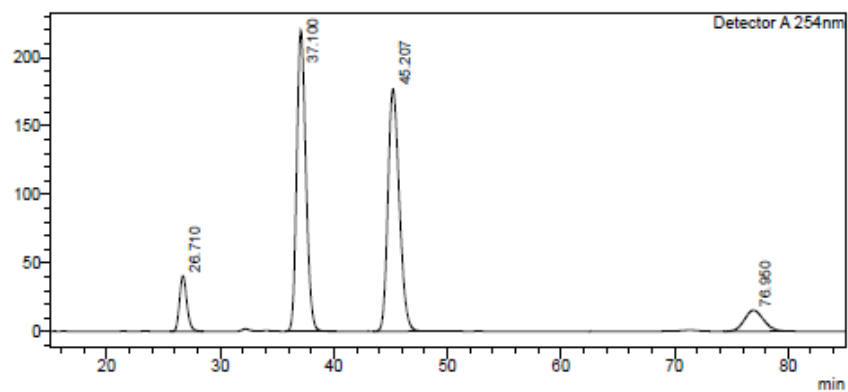

### <Peak Table>

Detector A 254nm

| Peak# | Ret. Time | Area     | Height | Conc.  | Unit | Mark | Name |
|-------|-----------|----------|--------|--------|------|------|------|
| 1     | 26.710    | 1817729  | 40580  | 6.434  |      |      |      |
| 2     | 37.100    | 12293983 | 219581 | 43.512 |      | S    |      |
| 3     | 45.207    | 12331455 | 177015 | 43.645 |      |      |      |
| 4     | 76.950    | 1810858  | 15283  | 6.409  |      |      |      |
| Total |           | 28254024 | 452439 |        |      |      |      |

## Chiral **3b**

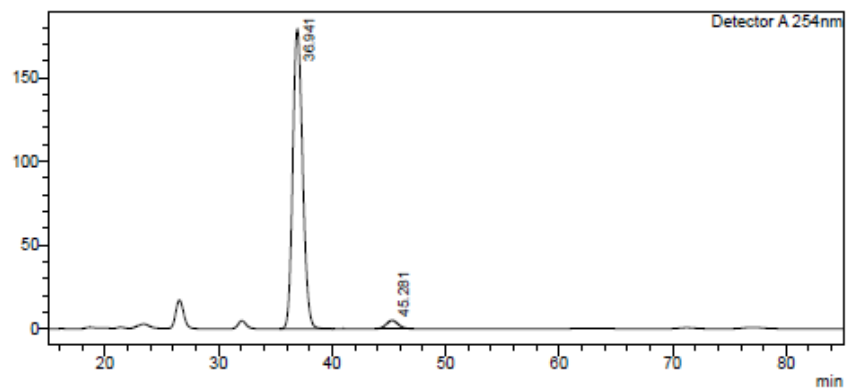

### <Peak Table>

Detector A 254nm

| Peak# | Ret. Time | Area     | Height | Conc.  | Unit | Mark | Name |
|-------|-----------|----------|--------|--------|------|------|------|
| 1     | 36.941    | 10822566 | 178831 | 96.757 |      |      |      |
| 2     | 45.281    | 362776   | 5029   | 3.243  |      |      |      |
| Total |           | 11185342 | 183859 |        |      |      |      |

### Racemic **3c**

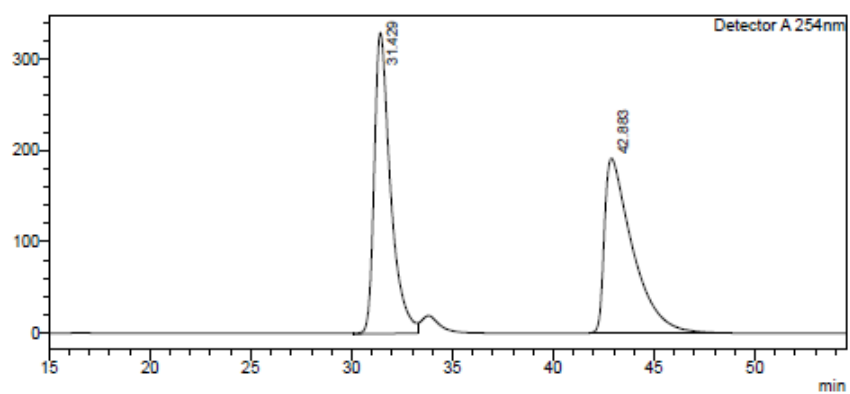

#### <Peak Table>

| Detector A 254nm |           |          |        |        |      |      |      |
|------------------|-----------|----------|--------|--------|------|------|------|
| Peak#            | Ret. Time | Area     | Height | Conc.  | Unit | Mark | Name |
| 1                | 31.429    | 18532489 | 329554 | 50.099 |      | M    |      |
| 2                | 42.883    | 18459181 | 191352 | 49.901 |      | M    |      |
| Total            |           | 36991669 | 520907 |        |      |      |      |

### Chiral **3c**

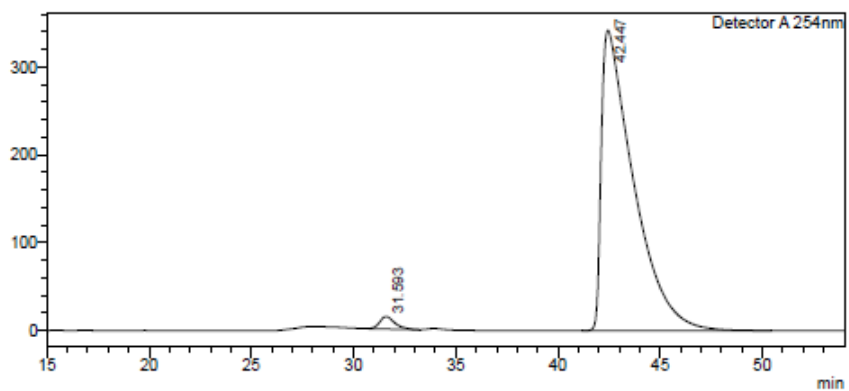

#### <Peak Table>

| Detector A 254nm |           |          |        |        |      |      |      |
|------------------|-----------|----------|--------|--------|------|------|------|
| Peak#            | Ret. Time | Area     | Height | Conc.  | Unit | Mark | Name |
| 1                | 31.593    | 725694   | 14104  | 1.898  |      |      |      |
| 2                | 42.447    | 37508883 | 341750 | 98.102 |      |      |      |
| Total            |           | 38234577 | 355854 |        |      |      |      |

## Racemic 3d

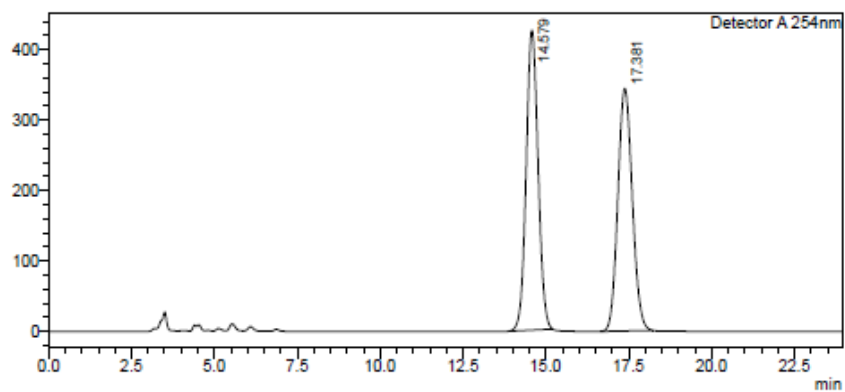

### <Peak Table>

| Peak# | Ret. Time | Area     | Height | Conc.  | Unit | Mark | Name |
|-------|-----------|----------|--------|--------|------|------|------|
| 1     | 14.579    | 10641537 | 425624 | 50.527 |      | M    |      |
| 2     | 17.381    | 10419844 | 344335 | 49.473 |      | M    |      |
| Total |           | 21061181 | 769959 |        |      |      |      |

## Chiral 3d

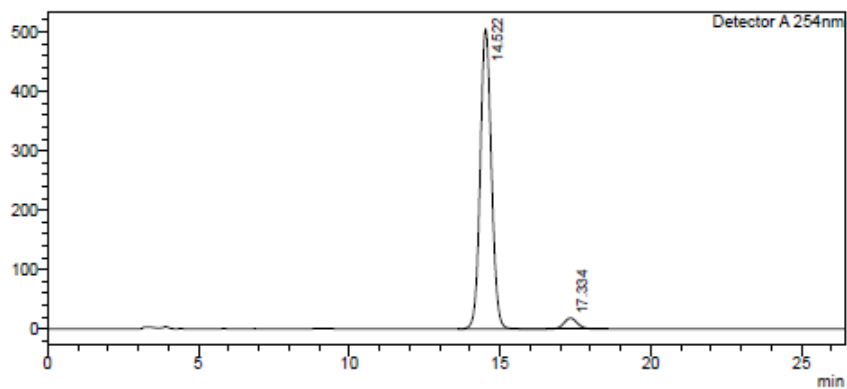

### <Peak Table>

| Peak# | Ret. Time | Area     | Height | Conc.  | Unit | Mark | Name |
|-------|-----------|----------|--------|--------|------|------|------|
| 1     | 14.522    | 13013488 | 504614 | 95.826 |      |      |      |
| 2     | 17.334    | 566849   | 18389  | 4.174  |      | V    |      |
| Total |           | 13580337 | 523003 |        |      |      |      |

### Racemic **3e**

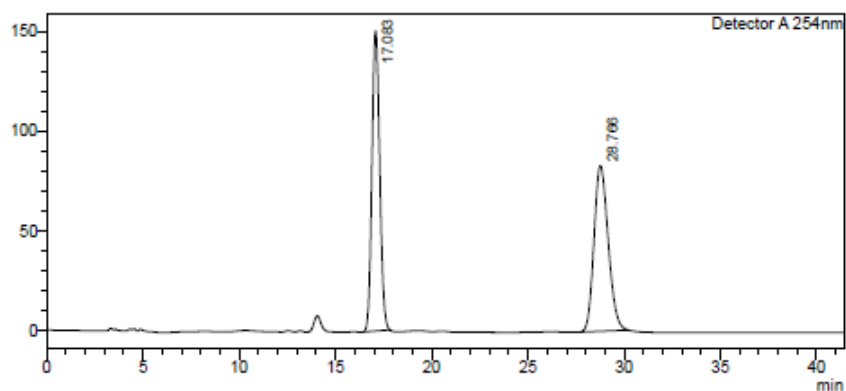

#### <Peak Table>

Detector A 254nm

| Peak# | Ret. Time | Area    | Height | Conc.  | Unit | Mark | Name |
|-------|-----------|---------|--------|--------|------|------|------|
| 1     | 17.083    | 4220496 | 150536 | 49.731 |      | M    |      |
| 2     | 28.766    | 4266087 | 83178  | 50.269 |      | M    |      |
| Total |           | 8486583 | 233714 |        |      |      |      |

### Chiral **3e**

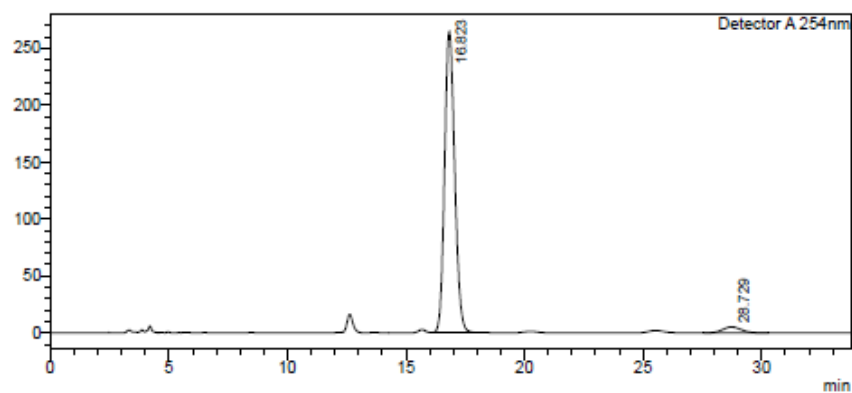

#### <Peak Table>

Detector A 254nm

| Peak# | Ret. Time | Area    | Height | Conc.  | Unit | Mark | Name |
|-------|-----------|---------|--------|--------|------|------|------|
| 1     | 16.823    | 7833131 | 264536 | 96.495 |      |      |      |
| 2     | 28.729    | 284491  | 5331   | 3.505  |      |      |      |
| Total |           | 8117621 | 269867 |        |      |      |      |

## Racemic **3f**

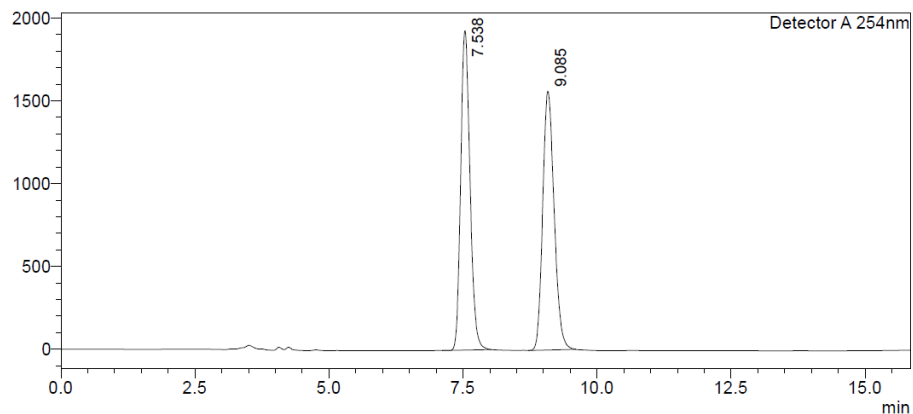

### <Peak Table>

Detector A 254nm

| Peak# | Ret. Time | Area     | Height  | Conc.  | Unit | Mark | Name |
|-------|-----------|----------|---------|--------|------|------|------|
| 1     | 7.538     | 23266400 | 1926773 | 50.116 |      | M    |      |
| 2     | 9.085     | 23159016 | 1561249 | 49.884 |      | M    |      |
| Total |           | 46425415 | 3488022 |        |      |      |      |

## Chiral **3f**

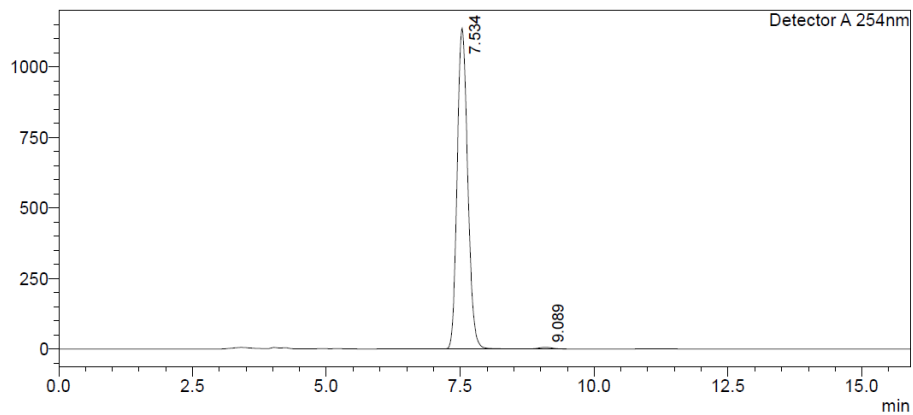

### <Peak Table>

Detector A 254nm

| Peak# | Ret. Time | Area     | Height  | Conc.  | Unit | Mark | Name |
|-------|-----------|----------|---------|--------|------|------|------|
| 1     | 7.534     | 15572972 | 1136332 | 99.332 |      | M    |      |
| 2     | 9.089     | 104732   | 6294    | 0.668  |      | M    |      |
| Total |           | 15677704 | 1142625 |        |      |      |      |

### Racemic 3g

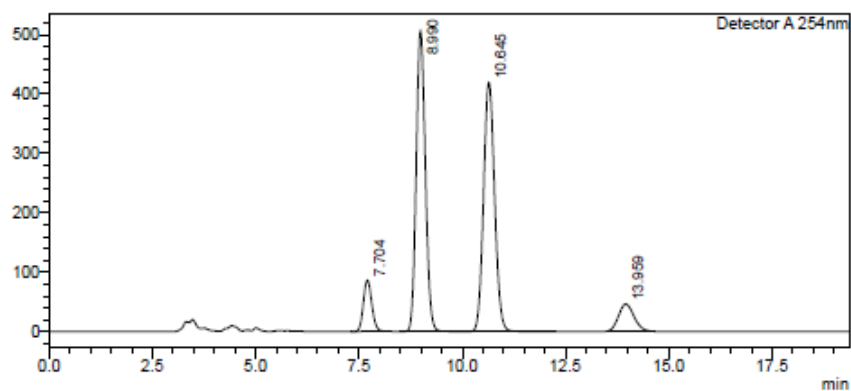

#### <Peak Table>

| Detector A 254nm |           |          |         |        |      |      |      |
|------------------|-----------|----------|---------|--------|------|------|------|
| Peak#            | Ret. Time | Area     | Height  | Conc.  | Unit | Mark | Name |
| 1                | 7.704     | 1214667  | 86242   | 6.751  |      | M    |      |
| 2                | 8.990     | 7797562  | 505882  | 43.336 |      |      |      |
| 3                | 10.645    | 7804914  | 419514  | 43.377 |      | V    |      |
| 4                | 13.959    | 1178043  | 45587   | 6.536  |      | M    |      |
| Total            |           | 17993186 | 1057224 |        |      |      |      |

### Chiral 3g

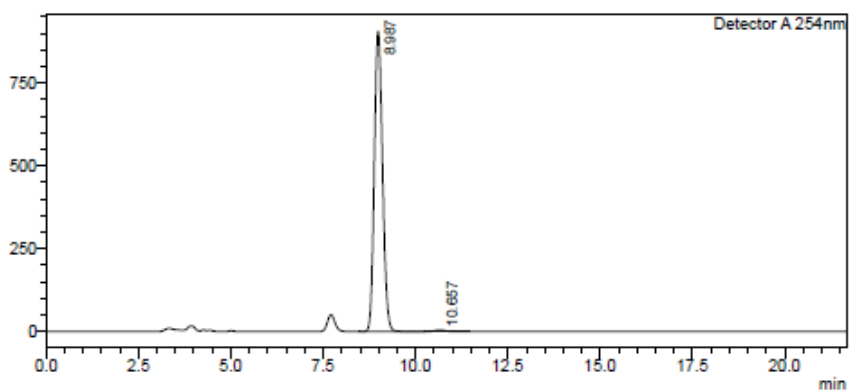

#### <Peak Table>

| Detector A 254nm |           |          |        |        |      |      |      |
|------------------|-----------|----------|--------|--------|------|------|------|
| Peak#            | Ret. Time | Area     | Height | Conc.  | Unit | Mark | Name |
| 1                | 8.987     | 14050240 | 905794 | 99.406 |      |      |      |
| 2                | 10.657    | 83900    | 4421   | 0.594  |      | V    |      |
| Total            |           | 14134140 | 910215 |        |      |      |      |

## Racemic 3h

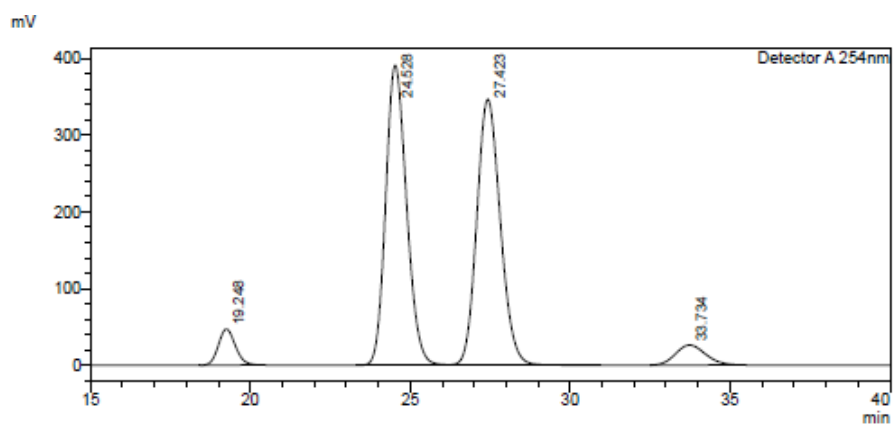

### <Peak Table>

Detector A 254nm

| Peak# | Ret. Time | Area     | Height | Conc.  | Unit | Mark | Name |
|-------|-----------|----------|--------|--------|------|------|------|
| 1     | 19.248    | 1736756  | 47039  | 4.461  |      | M    |      |
| 2     | 24.528    | 17743828 | 390806 | 45.579 |      |      |      |
| 3     | 27.423    | 17758671 | 346644 | 45.617 |      | V    |      |
| 4     | 33.734    | 1690702  | 26019  | 4.343  |      | M    |      |
| Total |           | 38929967 | 810508 |        |      |      |      |

## Chiral 3h

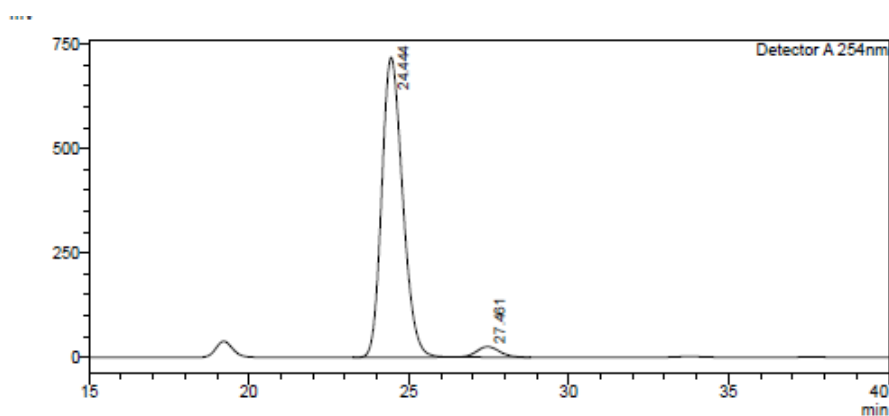

### <Peak Table>

Detector A 254nm

| Peak# | Ret. Time | Area     | Height | Conc.  | Unit | Mark | Name |
|-------|-----------|----------|--------|--------|------|------|------|
| 1     | 24.444    | 32700791 | 717984 | 96.310 |      |      |      |
| 2     | 27.461    | 1252873  | 25139  | 3.690  |      | M    |      |
| Total |           | 33953664 | 743123 |        |      |      |      |



## Racemic **3i**

### <Chromatogram>

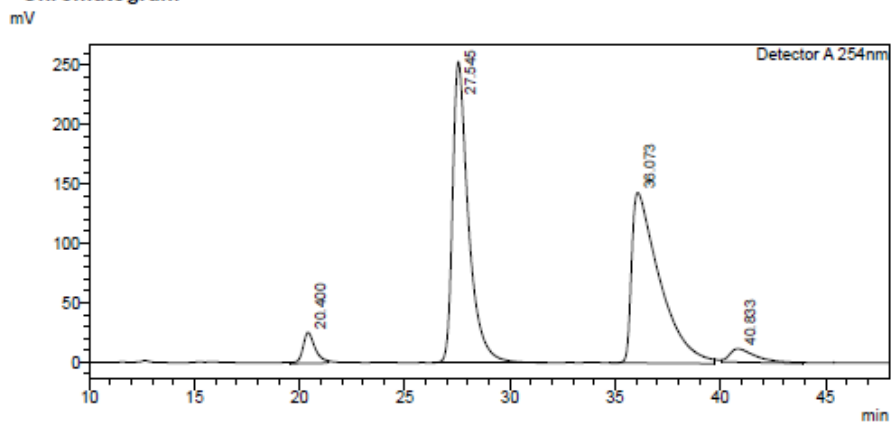

### <Peak Table>

Detector A 254nm

| Peak# | Ret. Time | Area     | Height | Conc.  | Unit | Mark | Name |
|-------|-----------|----------|--------|--------|------|------|------|
| 1     | 20.400    | 1039973  | 25886  | 3.641  |      | M    |      |
| 2     | 27.545    | 13276421 | 253265 | 46.486 |      |      |      |
| 3     | 36.073    | 13266844 | 143439 | 46.452 |      | M    |      |
| 4     | 40.833    | 976849   | 11133  | 3.420  |      | M    |      |
| Total |           | 28560087 | 433723 |        |      |      |      |

## Chiral **3i**

### <Chromatogram>

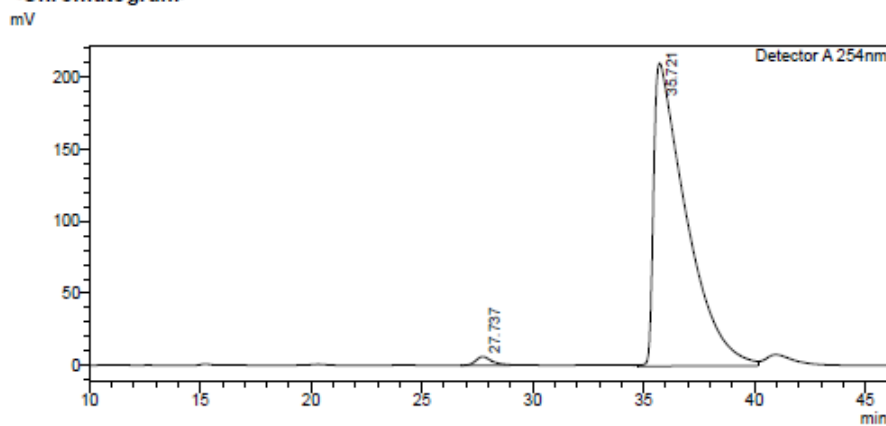

### <Peak Table>

Detector A 254nm

| Peak# | Ret. Time | Area     | Height | Conc.  | Unit | Mark | Name |
|-------|-----------|----------|--------|--------|------|------|------|
| 1     | 27.737    | 308737   | 5969   | 1.417  |      |      |      |
| 2     | 35.721    | 21474013 | 210373 | 98.583 |      | M    |      |
| Total |           | 21782750 | 216342 |        |      |      |      |

### Racemic 3j

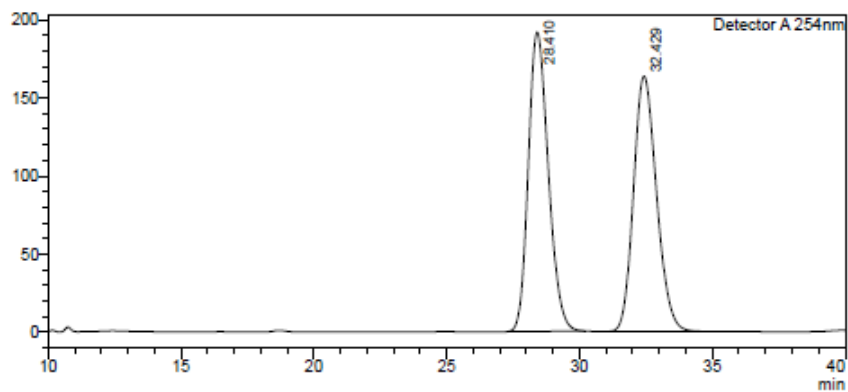

#### <Peak Table>

Detector A 254nm

| Peak# | Ret. Time | Area     | Height | Conc.  | Unit | Mark | Name |
|-------|-----------|----------|--------|--------|------|------|------|
| 1     | 28.410    | 10072987 | 191404 | 50.422 |      | M    |      |
| 2     | 32.429    | 9904498  | 163440 | 49.578 |      | M    |      |
| Total |           | 19977484 | 354844 |        |      |      |      |

### Chiral 3j

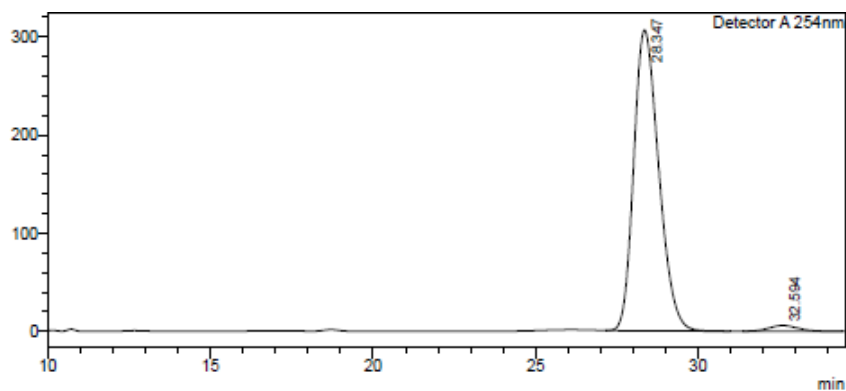

#### <Peak Table>

Detector A 254nm

| Peak# | Ret. Time | Area     | Height | Conc.  | Unit | Mark | Name |
|-------|-----------|----------|--------|--------|------|------|------|
| 1     | 28.347    | 16370866 | 306101 | 97.836 |      |      |      |
| 2     | 32.594    | 362081   | 5959   | 2.164  |      |      |      |
| Total |           | 16732947 | 312061 |        |      |      |      |

## Racemic 3k

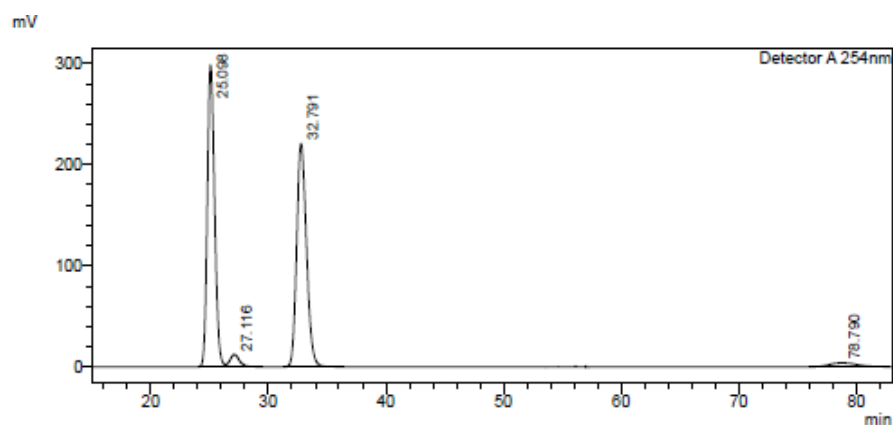

### <Peak Table>

Detector A 254nm

| Peak# | Ret. Time | Area     | Height | Conc.  | Unit | Mark | Name |
|-------|-----------|----------|--------|--------|------|------|------|
| 1     | 25.098    | 12775713 | 297254 | 47.559 |      |      |      |
| 2     | 27.116    | 674313   | 12093  | 2.510  |      | V    |      |
| 3     | 32.791    | 12790626 | 220536 | 47.614 |      |      |      |
| 4     | 78.790    | 622299   | 4004   | 2.317  |      |      |      |
| Total |           | 26862950 | 533886 |        |      |      |      |

## Chiral 3k

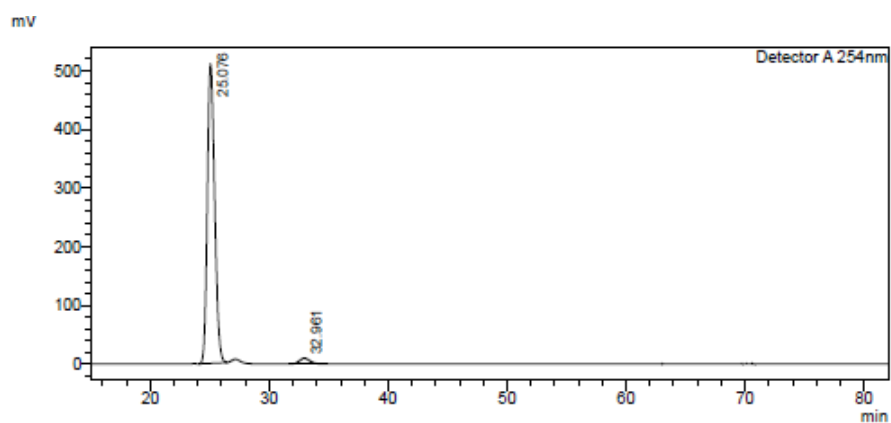

### <Peak Table>

Detector A 254nm

| Peak# | Ret. Time | Area     | Height | Conc.  | Unit | Mark | Name |
|-------|-----------|----------|--------|--------|------|------|------|
| 1     | 25.076    | 21858503 | 509190 | 97.399 |      |      |      |
| 2     | 32.961    | 583685   | 9955   | 2.601  |      |      |      |
| Total |           | 22442189 | 519145 |        |      |      |      |

## Racemic 31

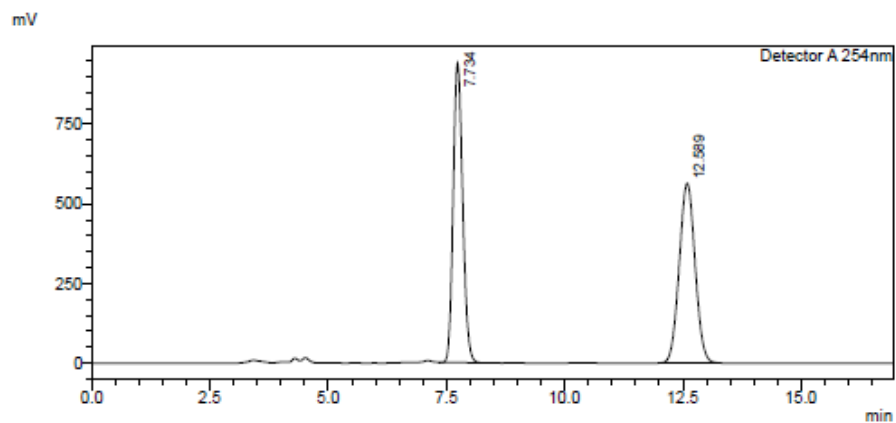

### <Peak Table>

Detector A 254nm

| Peak# | Ret. Time | Area     | Height  | Conc.  | Unit | Mark | Name |
|-------|-----------|----------|---------|--------|------|------|------|
| 1     | 7.734     | 13147305 | 940182  | 50.005 |      | M    |      |
| 2     | 12.589    | 13144485 | 583701  | 49.995 |      | M    |      |
| Total |           | 26291770 | 1503883 |        |      |      |      |

## Chiral 31

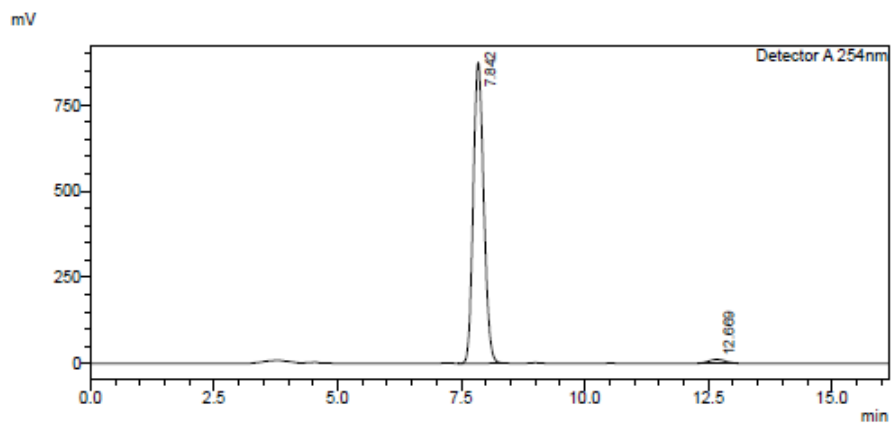

### <Peak Table>

Detector A 254nm

| Peak# | Ret. Time | Area     | Height | Conc.  | Unit | Mark | Name |
|-------|-----------|----------|--------|--------|------|------|------|
| 1     | 7.842     | 12910525 | 871218 | 98.057 |      | M    |      |
| 2     | 12.669    | 255853   | 11538  | 1.943  |      | M    |      |
| Total |           | 13166379 | 882754 |        |      |      |      |

## Racemic 3m

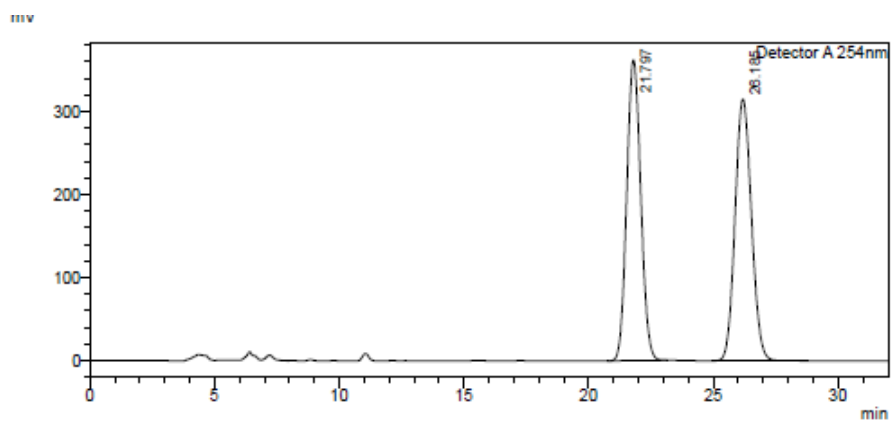

### <Peak Table>

| Detector A 254nm |           |          |        |        |      |      |      |
|------------------|-----------|----------|--------|--------|------|------|------|
| Peak#            | Ret. Time | Area     | Height | Conc.  | Unit | Mark | Name |
| 1                | 21.797    | 14154951 | 361742 | 49.528 |      |      |      |
| 2                | 26.185    | 14424975 | 315075 | 50.472 |      |      |      |
| Total            |           | 28579926 | 676817 |        |      |      |      |

## Chiral 3m

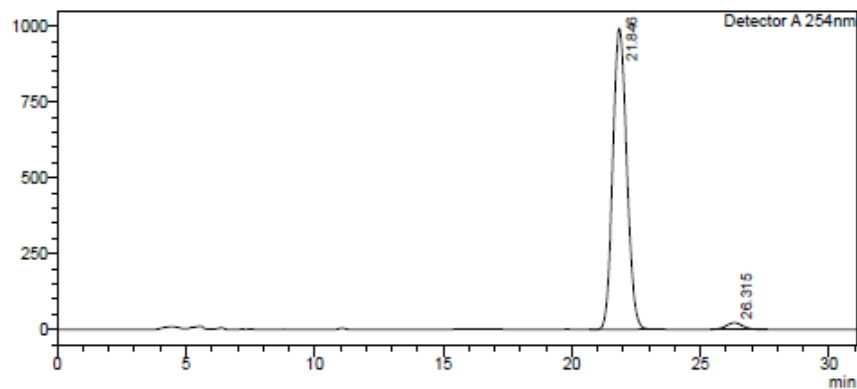

### <Peak Table>

| Detector A 254nm |           |          |         |        |      |      |      |
|------------------|-----------|----------|---------|--------|------|------|------|
| Peak#            | Ret. Time | Area     | Height  | Conc.  | Unit | Mark | Name |
| 1                | 21.846    | 37499577 | 991174  | 97.473 |      | M    |      |
| 2                | 26.315    | 972266   | 21944   | 2.527  |      | M    |      |
| Total            |           | 38470843 | 1013119 |        |      |      |      |

## Racemic **3n**

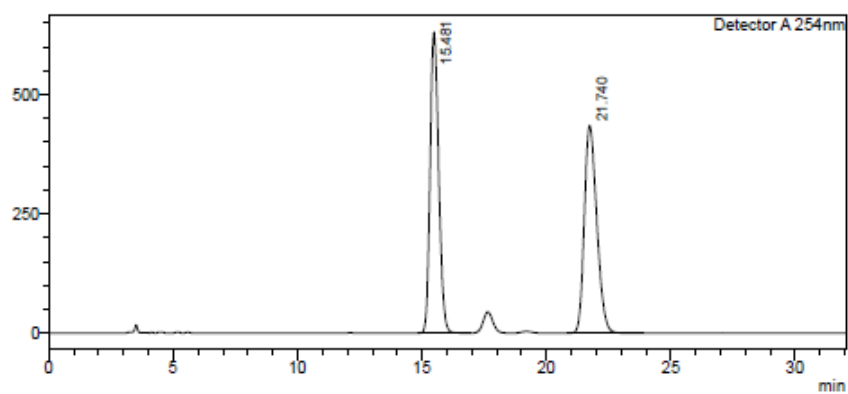

### <Peak Table>

| Peak# | Ret. Time | Area     | Height  | Conc.  | Unit | Mark | Name |
|-------|-----------|----------|---------|--------|------|------|------|
| 1     | 15.481    | 15161829 | 630208  | 49.989 |      |      |      |
| 2     | 21.740    | 15168703 | 434988  | 50.011 |      |      |      |
| Total |           | 30330532 | 1065196 |        |      |      |      |

## Chiral **3n**

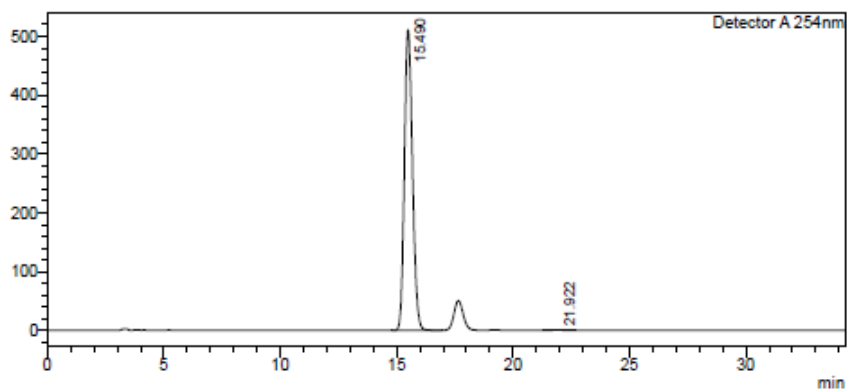

### <Peak Table>

| Peak# | Ret. Time | Area     | Height | Conc.  | Unit | Mark | Name |
|-------|-----------|----------|--------|--------|------|------|------|
| 1     | 15.490    | 12354161 | 510442 | 99.827 |      |      |      |
| 2     | 21.922    | 21360    | 621    | 0.173  |      |      |      |
| Total |           | 12375520 | 511063 |        |      |      |      |

## Racemic **3o**

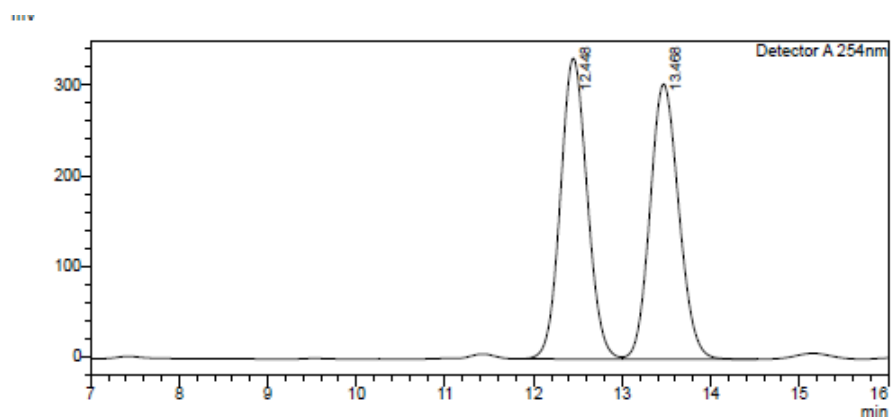

### <Peak Table>

| Detector A 254nm |           |          |        |        |      |      |      |
|------------------|-----------|----------|--------|--------|------|------|------|
| Peak#            | Ret. Time | Area     | Height | Conc.  | Unit | Mark | Name |
| 1                | 12.448    | 6991643  | 332241 | 50.441 |      |      |      |
| 2                | 13.468    | 6869433  | 304050 | 49.559 |      | V    |      |
| Total            |           | 13861075 | 636291 |        |      |      |      |

## Chiral **3o**

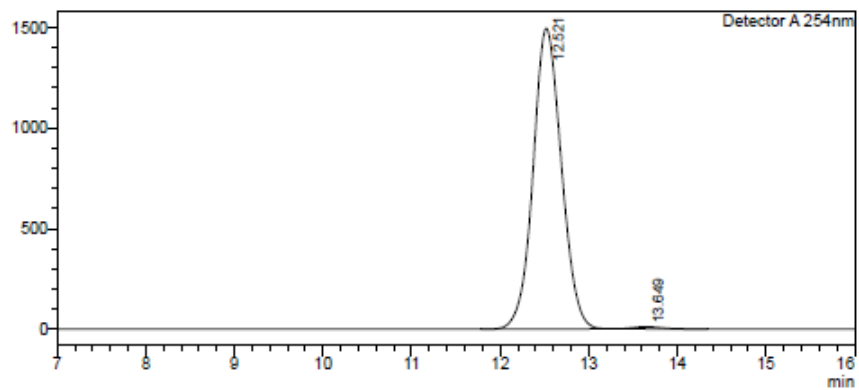

### <Peak Table>

| Detector A 254nm |           |          |         |        |      |      |      |
|------------------|-----------|----------|---------|--------|------|------|------|
| Peak#            | Ret. Time | Area     | Height  | Conc.  | Unit | Mark | Name |
| 1                | 12.521    | 33290078 | 1494128 | 99.345 |      |      |      |
| 2                | 13.649    | 219581   | 10303   | 0.655  |      | M    |      |
| Total            |           | 33509639 | 1504432 |        |      |      |      |

## Racemic 3p

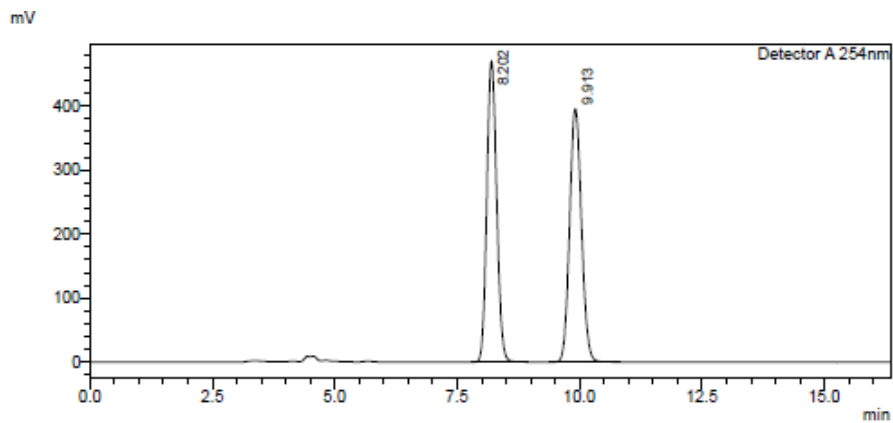

### <Peak Table>

| Detector A 254nm |           |          |        |        |      |      |      |
|------------------|-----------|----------|--------|--------|------|------|------|
| Peak#            | Ret. Time | Area     | Height | Conc.  | Unit | Mark | Name |
| 1                | 8.202     | 6555170  | 468992 | 49.622 |      | M    |      |
| 2                | 9.913     | 6655070  | 395601 | 50.378 |      | M    |      |
| Total            |           | 13210240 | 864593 |        |      |      |      |

## Chiral 3p

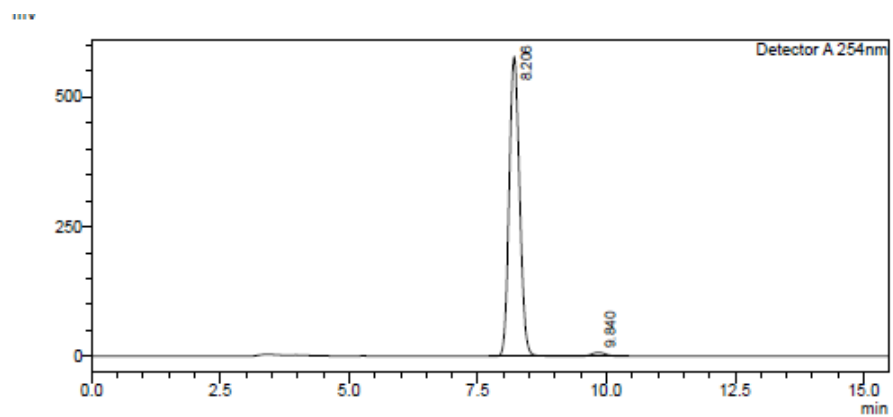

### <Peak Table>

| Detector A 254nm |           |         |        |        |      |      |      |
|------------------|-----------|---------|--------|--------|------|------|------|
| Peak#            | Ret. Time | Area    | Height | Conc.  | Unit | Mark | Name |
| 1                | 8.206     | 8143373 | 576870 | 98.387 |      |      |      |
| 2                | 9.840     | 133487  | 7375   | 1.613  |      | V    |      |
| Total            |           | 8276860 | 584245 |        |      |      |      |



### Racemic 3q

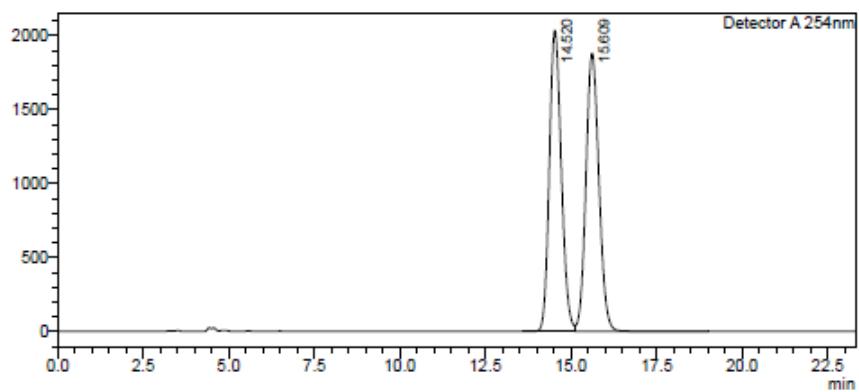

#### <Peak Table>

| Peak# | Ret. Time | Area     | Height  | Conc.  | Unit | Mark | Name |
|-------|-----------|----------|---------|--------|------|------|------|
| 1     | 14.520    | 49369171 | 2035134 | 49.818 |      |      |      |
| 2     | 15.609    | 49729700 | 1882139 | 50.182 |      | SV   |      |
| Total |           | 99098872 | 3917273 |        |      |      |      |

### Chiral 3q

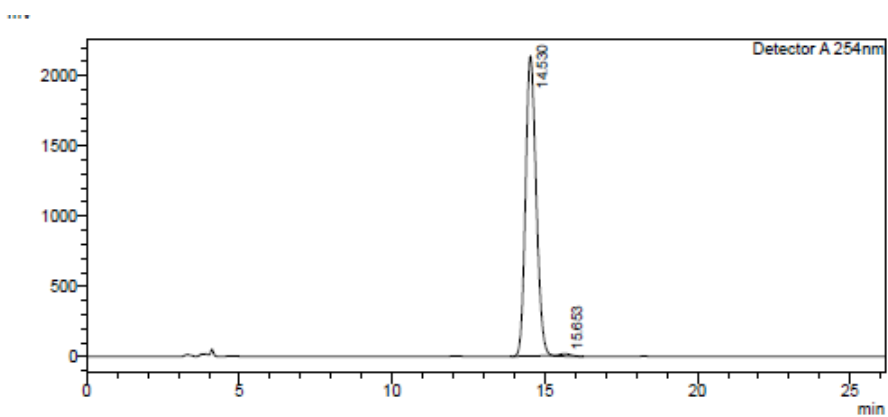

#### <Peak Table>

| Peak# | Ret. Time | Area     | Height  | Conc.  | Unit | Mark | Name |
|-------|-----------|----------|---------|--------|------|------|------|
| 1     | 14.530    | 51735126 | 2132998 | 99.119 |      |      |      |
| 2     | 15.653    | 480022   | 17968   | 0.881  |      | M    |      |
| Total |           | 52195147 | 2150964 |        |      |      |      |

## Racemic **3r**

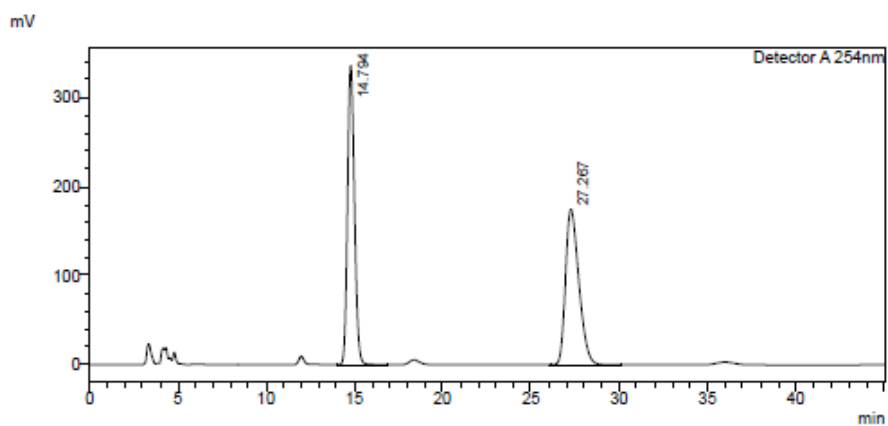

<Peak Table>

| Detector A 254nm |           |          |        |        |
|------------------|-----------|----------|--------|--------|
| Peak#            | Ret. Time | Area     | Height | Conc.  |
| 1                | 14.794    | 9143670  | 338072 | 49.928 |
| 2                | 27.267    | 9169908  | 174446 | 50.072 |
| Total            |           | 18313578 | 510517 |        |

## Chiral **3r**

<Chromatogram>

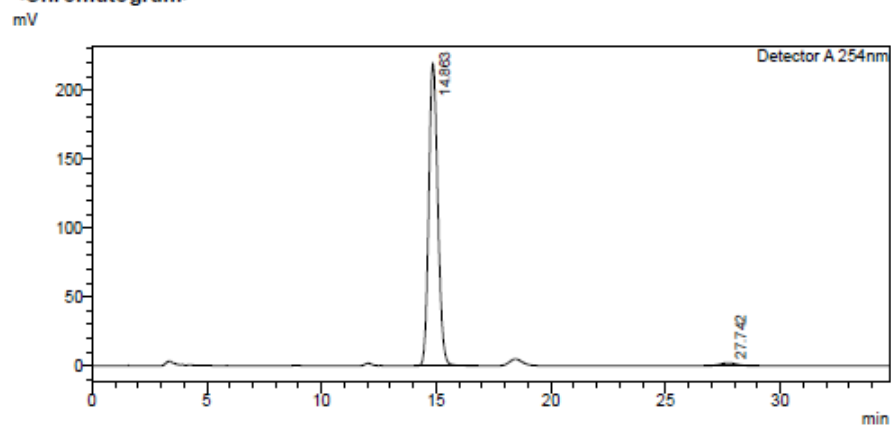

<Peak Table>

| Detector A 254nm |           |         |        |        |      |      |      |
|------------------|-----------|---------|--------|--------|------|------|------|
| Peak#            | Ret. Time | Area    | Height | Conc.  | Unit | Mark | Name |
| 1                | 14.863    | 6021519 | 219315 | 98.281 |      |      |      |
| 2                | 27.742    | 105317  | 2055   | 1.719  |      |      |      |
| Total            |           | 6126836 | 221370 |        |      |      |      |

### Racemic 3s

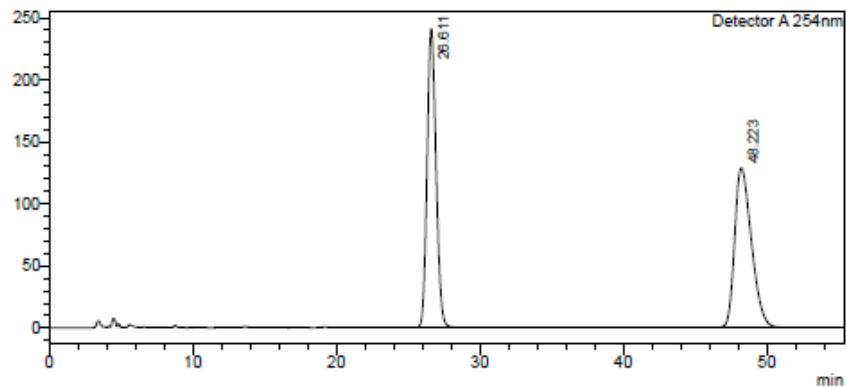

#### <Peak Table>

| Peak# | Ret. Time | Area     | Height | Conc.  | Unit | Mark | Name |
|-------|-----------|----------|--------|--------|------|------|------|
| 1     | 26.611    | 10435161 | 240940 | 50.018 |      |      |      |
| 2     | 48.223    | 10427519 | 128551 | 49.982 |      |      |      |
| Total |           | 20862680 | 369491 |        |      |      |      |

### Chiral 3s

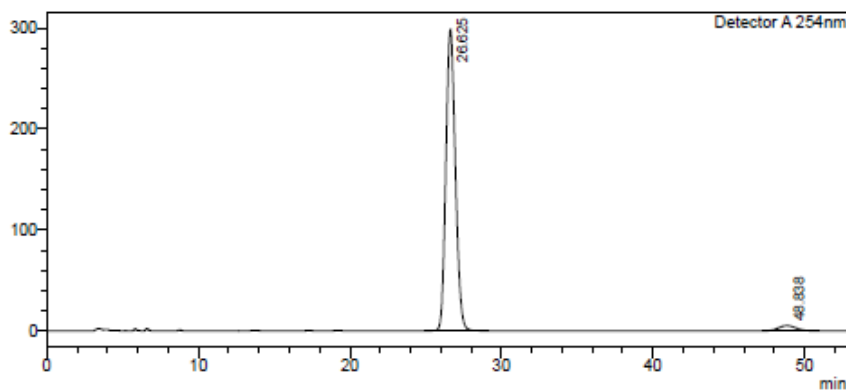

#### <Peak Table>

| Peak# | Ret. Time | Area     | Height | Conc.  | Unit | Mark | Name |
|-------|-----------|----------|--------|--------|------|------|------|
| 1     | 26.625    | 13022774 | 288359 | 96.906 |      |      |      |
| 2     | 48.838    | 415795   | 5334   | 3.094  |      |      |      |
| Total |           | 13438569 | 303693 |        |      |      |      |

## Racemic 3t

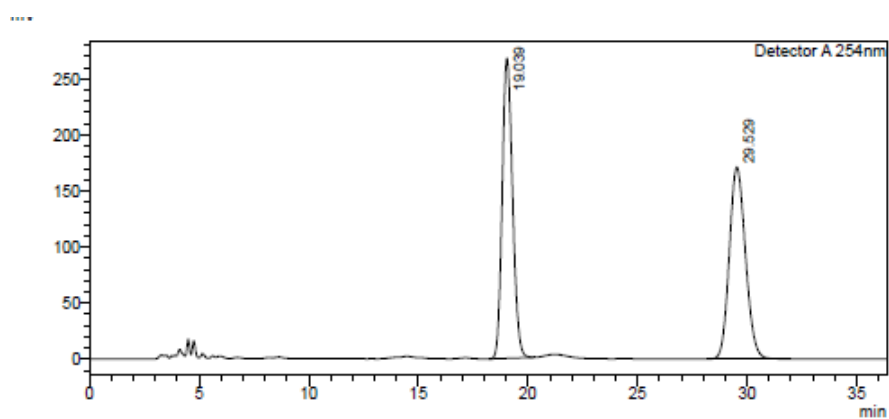

### <Peak Table>

| Detector A 254nm |           |          |        |        |      |      |      |
|------------------|-----------|----------|--------|--------|------|------|------|
| Peak#            | Ret. Time | Area     | Height | Conc.  | Unit | Mark | Name |
| 1                | 19.039    | 8792306  | 267478 | 50.020 |      |      |      |
| 2                | 29.529    | 8785259  | 170958 | 49.980 |      |      |      |
| Total            |           | 17577564 | 438436 |        |      |      |      |

## Chiral 3t

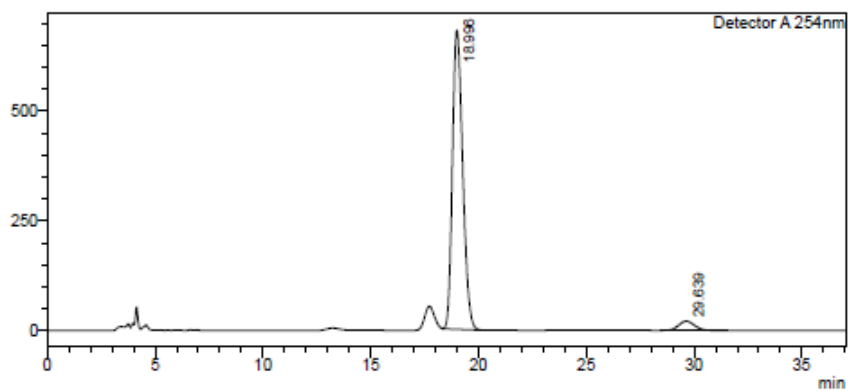

### <Peak Table>

| Detector A 254nm |           |          |        |        |      |      |      |
|------------------|-----------|----------|--------|--------|------|------|------|
| Peak#            | Ret. Time | Area     | Height | Conc.  | Unit | Mark | Name |
| 1                | 18.996    | 22574653 | 681453 | 95.452 |      |      |      |
| 2                | 29.639    | 1075624  | 21046  | 4.548  |      |      |      |
| Total            |           | 23650277 | 702499 |        |      |      |      |

## Racemic **3u**

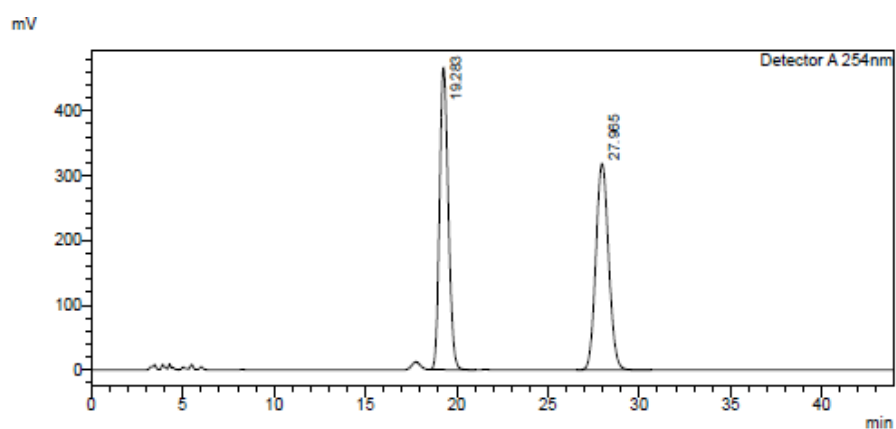

### <Peak Table>

| Peak# | Ret. Time | Area     | Height | Conc.  | Unit | Mark | Name |
|-------|-----------|----------|--------|--------|------|------|------|
| 1     | 19.283    | 15515173 | 466134 | 49.914 |      |      |      |
| 2     | 27.965    | 15568560 | 318680 | 50.086 |      |      |      |
| Total |           | 31083733 | 784814 |        |      |      |      |

## Chiral **3u**

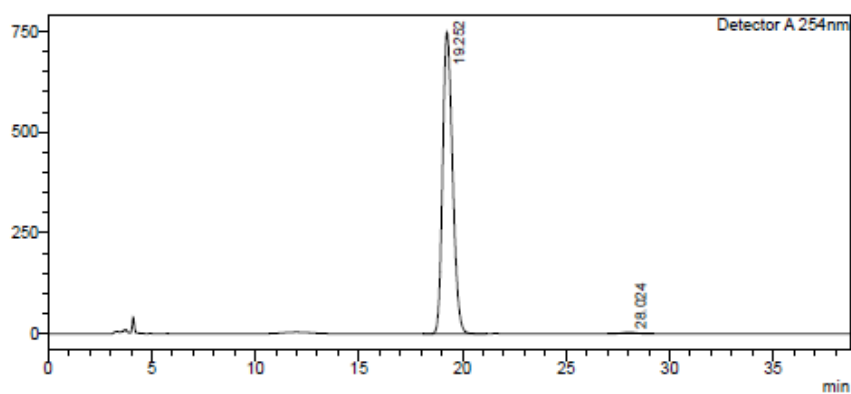

### <Peak Table>

| Peak# | Ret. Time | Area     | Height | Conc.  | Unit | Mark | Name |
|-------|-----------|----------|--------|--------|------|------|------|
| 1     | 19.252    | 25036740 | 747159 | 99.350 |      | M    |      |
| 2     | 28.024    | 163689   | 3380   | 0.650  |      | M    |      |
| Total |           | 25200430 | 750538 |        |      |      |      |

## Racemic **3v**

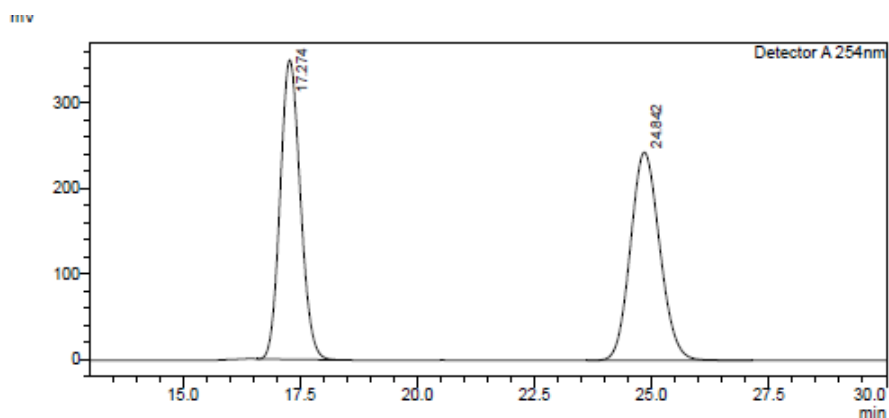

### <Peak Table>

| Detector A 254nm |           |          |        |        |      |      |      |
|------------------|-----------|----------|--------|--------|------|------|------|
| Peak#            | Ret. Time | Area     | Height | Conc.  | Unit | Mark | Name |
| 1                | 17.274    | 10494930 | 350350 | 49.742 |      |      |      |
| 2                | 24.842    | 10603628 | 243529 | 50.258 |      |      |      |
| Total            |           | 21098558 | 593879 |        |      |      |      |

## Chiral **3v**

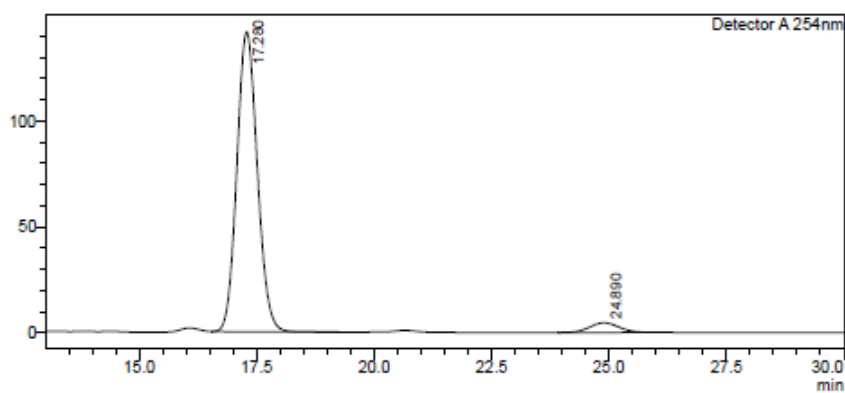

### <Peak Table>

| Detector A 254nm |           |         |        |        |      |      |      |
|------------------|-----------|---------|--------|--------|------|------|------|
| Peak#            | Ret. Time | Area    | Height | Conc.  | Unit | Mark | Name |
| 1                | 17.280    | 4288233 | 141304 | 95.589 |      | S    |      |
| 2                | 24.890    | 197905  | 4579   | 4.411  |      |      |      |
| Total            |           | 4486138 | 145882 |        |      |      |      |

## Racemic 4

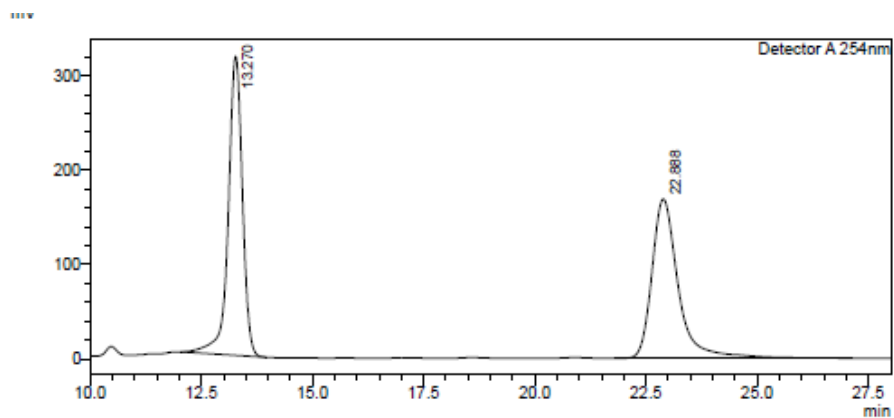

### <Peak Table>

Detector A 254nm

| Peak# | Ret. Time | Area     | Height | Conc.  | Unit | Mark | Name |
|-------|-----------|----------|--------|--------|------|------|------|
| 1     | 13.270    | 7022584  | 318642 | 50.272 |      |      |      |
| 2     | 22.888    | 8946485  | 168729 | 49.728 |      |      |      |
| Total |           | 13969049 | 485371 |        |      |      |      |

## Chiral 4

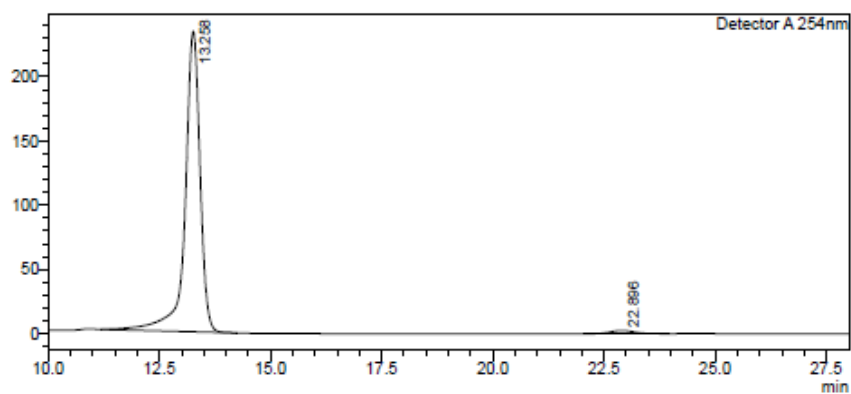

### <Peak Table>

Detector A 254nm

| Peak# | Ret. Time | Area    | Height | Conc.  | Unit | Mark | Name |
|-------|-----------|---------|--------|--------|------|------|------|
| 1     | 13.258    | 5497244 | 233489 | 98.298 |      |      |      |
| 2     | 22.898    | 95160   | 2477   | 1.702  |      |      |      |
| Total |           | 5592404 | 235966 |        |      |      |      |

## Racemic 5

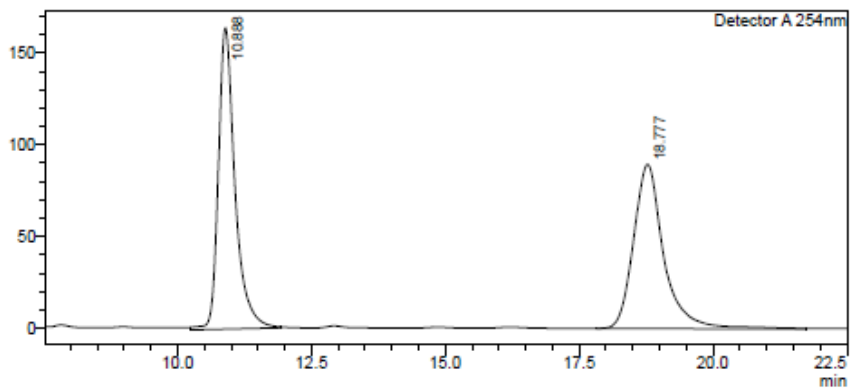

### <Peak Table>

| Peak# | Ret. Time | Area    | Height | Conc.  | Unit | Mark | Name |
|-------|-----------|---------|--------|--------|------|------|------|
| 1     | 10.888    | 3553127 | 164056 | 50.162 |      | M    |      |
| 2     | 18.777    | 3530147 | 89441  | 49.838 |      | M    |      |
| Total |           | 7083274 | 253497 |        |      |      |      |

## Chiral 5

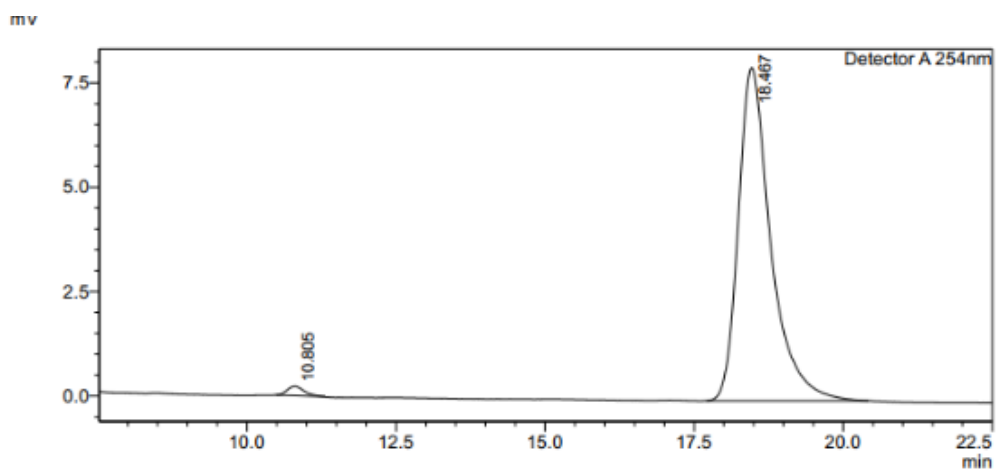

### <Peak Table>

| Peak# | Ret. Time | Area   | Height | Conc.  | Unit | Mark | Name |
|-------|-----------|--------|--------|--------|------|------|------|
| 1     | 10.805    | 4341   | 223    | 1.416  |      |      |      |
| 2     | 18.467    | 302268 | 7981   | 98.584 |      |      |      |
| Total |           | 306609 | 8204   |        |      |      |      |



## Stereochemistry Determination via Single Crystal X-Ray Diffraction

The data have been assigned to the Cambridge Crystallographic Data Centre with a deposition number CCDC 1837253.

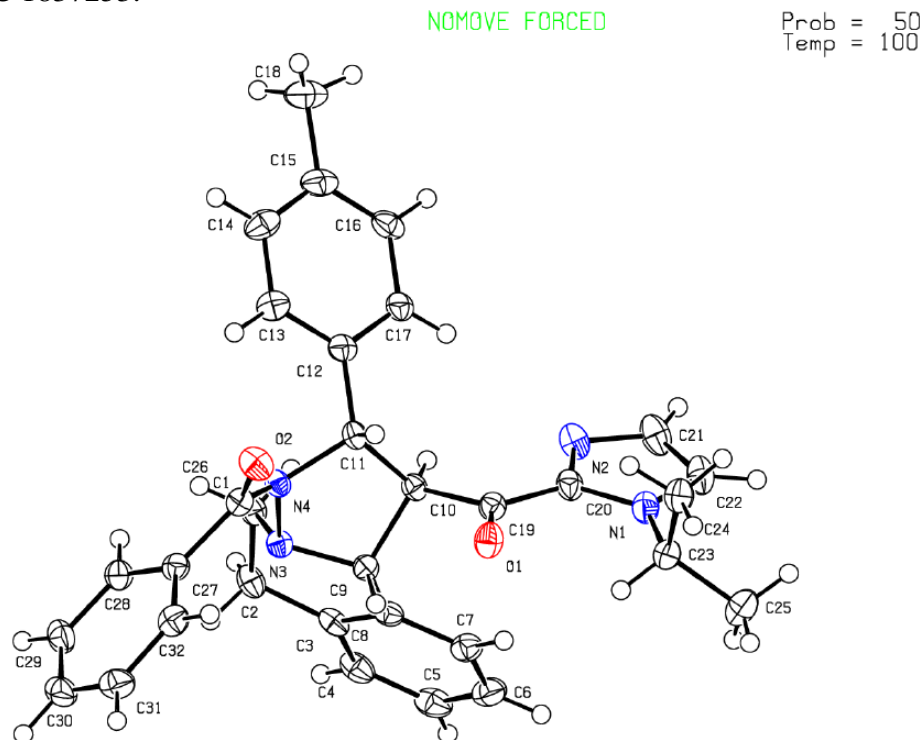

**Table 1.** Crystal data and structure refinement for **3i**.

|                                                  |                      |               |
|--------------------------------------------------|----------------------|---------------|
| Identification code                              | <b>3i</b>            |               |
| Empirical formula                                | $C_{32}H_{32}N_4O_2$ |               |
| Formula weight                                   | 504.61               |               |
| Temperature (K)                                  | 100.0(3)             |               |
| Wavelength ( $\text{\AA}$ )                      | 1.54184              |               |
| Crystal system                                   | orthorhombic         |               |
| Space group                                      | $P2_12_12_1$         |               |
| Unit cell dimensions ( $\text{\AA}$ , $^\circ$ ) | $a = 9.57270(10)$    | $\alpha = 90$ |
|                                                  | $b = 15.8631(2)$     | $\beta = 90$  |
|                                                  | $c = 17.8255(2)$     | $\gamma = 90$ |
| Volume ( $\text{\AA}^3$ )                        | 2706.85(5)           |               |

|                                                  |                                                |
|--------------------------------------------------|------------------------------------------------|
| Z                                                | 4                                              |
| Calculated density (g cm <sup>-3</sup> )         | 1.238                                          |
| Absorption coefficient (mm <sup>-1</sup> )       | 0.620                                          |
| $F_{000}$                                        | 1072                                           |
| Crystal size (mm <sup>3</sup> )                  | 0.13 × 0.12 × 0.10                             |
| $\theta$ range for data collection (°)           | 3.730 to 73.289                                |
| Miller index ranges                              | -11 ≤ $h$ ≤ 11, -19 ≤ $k$ ≤ 19, -19 ≤ $l$ ≤ 21 |
| Reflections collected                            | 20157                                          |
| Independent reflections                          | 5366 [ $R_{\text{int}} = 0.0276$ ]             |
| Completeness to $\theta_{\text{max}}$ (%)        | 0.994                                          |
| Max. and min. transmission                       | 0.77458 and 1.00000                            |
| Refinement method                                | Full-matrix least-squares on $F^2$             |
| Data / restraints / parameters                   | 5366 / 0 / 346                                 |
| Goodness-of-fit on $F^2$                         | 1.043                                          |
| Final $R$ indices [ $I > 2\sigma(I)$ ]           | $R1 = 0.0284$ , $wR2 = 0.0712$                 |
| $R$ indices (all data)                           | $R1 = 0.0301$ , $wR2 = 0.0726$                 |
| Largest diff. peak and hole (e Å <sup>-3</sup> ) | 0.133 and -0.150                               |
| Absolute structure parameter                     | .01(8)                                         |

## **References:**

1. C. Wang, L.-A. Chen, H. Huo, X. Shen, K. Harms, L. Gong, and E. Meggers, *Chem. Sci.*, 2015, **6**, 1094.
2. S.-W. Li, J. Gong and Q. Kang, *Org. Lett.*, 2017, **19**, 1350.
3. K. Li, Q. Wan and Q. Kang, *Org. Lett.*, 2017, **19**, 3299.
4. M. C. Myers, A. R. Bharadwaj, B. C. Milgram and K. A. Scheidt, *J. Am. Chem. Soc.*, 2005, **127**, 14675.
5. D. A. Evans, K. R. Fandrick and H.-J. Song, *J. Am. Chem. Soc.*, 2005, **127**, 8942.
6. S.-X. Lin, G.-J. Sun and Q. Kang, *Chem. Commun.*, 2017, **53**, 7665.
7. S.-W. Li, Q. Wan and Q. Kang, *Org. Lett.*, 2018, **20**, 1312.
8. T. Hashimoto, Y. Maeda, M. Omote, H. Nakatsu and K. Maruoka, *J. Am. Chem. Soc.*, 2010, **132**, 4076.
9. P. Maity, H. D. Srinivas and M. P. Watson, *J. Am. Chem. Soc.*, 2011, **133**, 17142.
